# Supplementary material for: Ag(i)/(S,S)-ip-FOXAP catalyzed diastereo- and enantioselective 1,3-dipolar cycloaddition of azomethine ylides with benzosultam-3-ylidenes
Source: Royal Society of Chemistry journal article supplement (doi:10.1039/d1nj01284c), 2021-01-01
Supplement: d1nj01284c1.pdf [file d1nj01284c1.pdf]

## *Supporting Information*

# **Ag(I)/ (S,S)-ip-FOXAP catalyzed diastereo- and enantioselective 1,3-dipolar cycloaddition of azomethine ylides with benzosultam-3-ylidenes**

*Luzhen Jiao, Guorui Cao, Dawei Teng \**

*State Key Laboratory Base of Eco-Chemical Engineering, College of Chemical Engineering, Qingdao University of Science and Technology, Qingdao 266042, China.*

## **Table of Contents**

|                                                                                               |         |
|-----------------------------------------------------------------------------------------------|---------|
| 1. General.....                                                                               | S2      |
| 2. General procedure for the preparation of spiropyrrolidinyl-benzothiazolines <b>3</b> ..... | S2      |
| 3. X-ray structure of <b>3ea</b> .....                                                        | S2      |
| 4. Characterization data and spectra of compound <b>3aa-5bc</b> .....                         | S3-S26  |
| 5. Chiral HPLC chromatograms of compound <b>3aa-5bc</b> .....                                 | S27-S42 |

---

\*Corresponding author. Tel.: +86-532-84022508; e-mail: [dteng@qust.edu.cn](mailto:dteng@qust.edu.cn)

## General

All the reagents were purchased from TCI chemicals and local suppliers and used without purification. The starting materials (**1a-h**) were prepared following our previous paper.<sup>1</sup> All reactions were monitored by TLC. Chromatography refers to open column chromatography on silica gel (100-200 mesh).

<sup>1</sup>H NMR spectra were recorded on 500 MHz and <sup>13</sup>C NMR spectra were recorded on 125 MHz by using a Bruker Avance 500M spectrometer. Chemical shifts were reported in parts per million ( $\delta$ ) relative to tetramethylsilane (TMS). Mass spectra were performed on an Ultima Global spectrometer with an ESI source. The X-ray single-crystal diffraction was performed on Saturn 724+ instrument. Chiral HPLC analysis was performed using a Shimadzu LC-20 HPLC.

### General procedure for the preparation of spiropyrrolidinyl-benzothiazolines **3**

After a suspension of the ip-FOXAP (0.0077 mmol, 3.7mg) and AgOAc (0.007 mol, 1.1mg) in toluene (0.2 mL) was stirred for 1h at room temperature, a solution of the imine **2** (0.12 mmol) in toluene (0.1 mL) was added. After being stirred at -25 °C for 10 mins, DABCO (0.12 mmol, 12.9mg) and a solution of the dipolarophile **1** (0.1mmol) in toluene (0.1 mL) was added and the resulting solution was stirred at -25 °C for 2h. After that, saturated aqueous NH<sub>4</sub>Cl (0.2 mL) was added and the organic layer was separated and evaporated to remove solvent under reduced pressure. The residue was subjected to column chromatography on silica gel (100-200 mesh) using petroleum/ethyl acetate as eluent to afford spiropyrrolidinyl-benzothiazolines **3**.

### (2'*S*,3*S*,4'*R*,5'*S*)-1-methyl-2'-phenyl-4'-(*o*-tolyl)-5'-methoxycarbonyl-1*H*-spiro[benzo[*c*]isothiazole-3,3'-pyrrolidine]-2,2-dioxide (**3ea**) (CCDC 2041776)

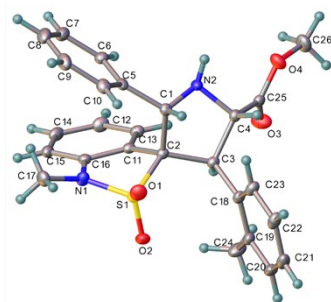

Fig 2. X-ray crystallography of compound **3ea**.

<sup>1</sup> G. Cao, F. Long, Y. Zhao, Y. Wang, L. Huang and D. Teng, *Tetrahedron*, 2014, 70, 9359.

## Characterization data and spectra of compound 3aa-5bc

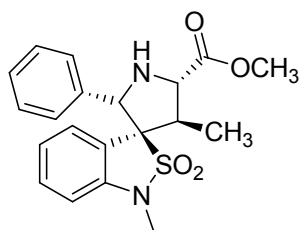

(2'*S*,3*S*,4'*R*,5'*S*)-1,4'-dimethyl-2'-phenyl-5'-methoxycarbonyl-1*H*-spiro[benzo[*c*]isothiazole-3,3'-pyrrolidine]-2,2-dioxide (**3aa**)

<sup>1</sup>H NMR (500 MHz, CDCl<sub>3</sub>): δ 7.19 (t, 1H, *J* = 7.8 Hz), 7.15-7.03 (m, 5H), 6.76 (t, 1H, *J* = 7.7 Hz), 6.53 (d, 1H, *J* = 7.8 Hz), 6.36 (d, 1H, *J* = 7.6 Hz), 5.19 (s, 1H), 4.07 (d, 1H, *J* = 9.4 Hz), 3.89 (s, 3H), 3.12-3.06 (m, 1H), 2.96 (s, 3H), 1.43 (d, 3H, *J* = 7.1 Hz). <sup>13</sup>C NMR (125 MHz, CDCl<sub>3</sub>): δ 173.4, 140.9, 138.0, 129.2, 127.9, 127.7, 127.4, 125.3, 122.9, 121.6, 108.7, 66.0, 64.5, 52.4, 43.2, 26.1, 12.6.; HRMS (ESI-TOF<sup>+</sup>): *m/z* Calcd. for C<sub>20</sub>H<sub>23</sub>N<sub>2</sub>O<sub>4</sub>S [(M+H)<sup>+</sup>]: 387.1379. Found: 387.1375. Chiral HPLC (Daicel Chiralpak AD-H, 30% IPA/hexanes, 1 mL/min, λ = 254 nm) *t*<sub>R</sub>(major) = 13.958 min, *t*<sub>R</sub>(minor) = 9.765 min; [α]<sub>D</sub><sup>25</sup> = -54.2° (c = 0.25, CH<sub>2</sub>Cl<sub>2</sub>).

### <sup>1</sup>H NMR Spectrum of 3aa

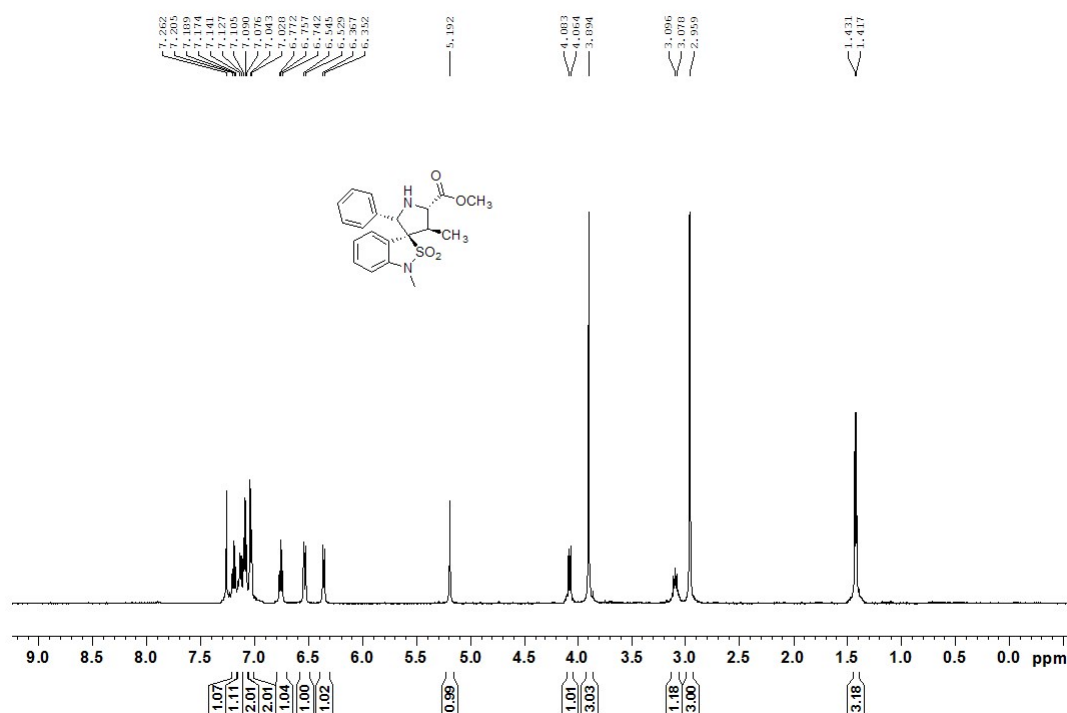

### <sup>13</sup>C NMR Spectrum of 3aa

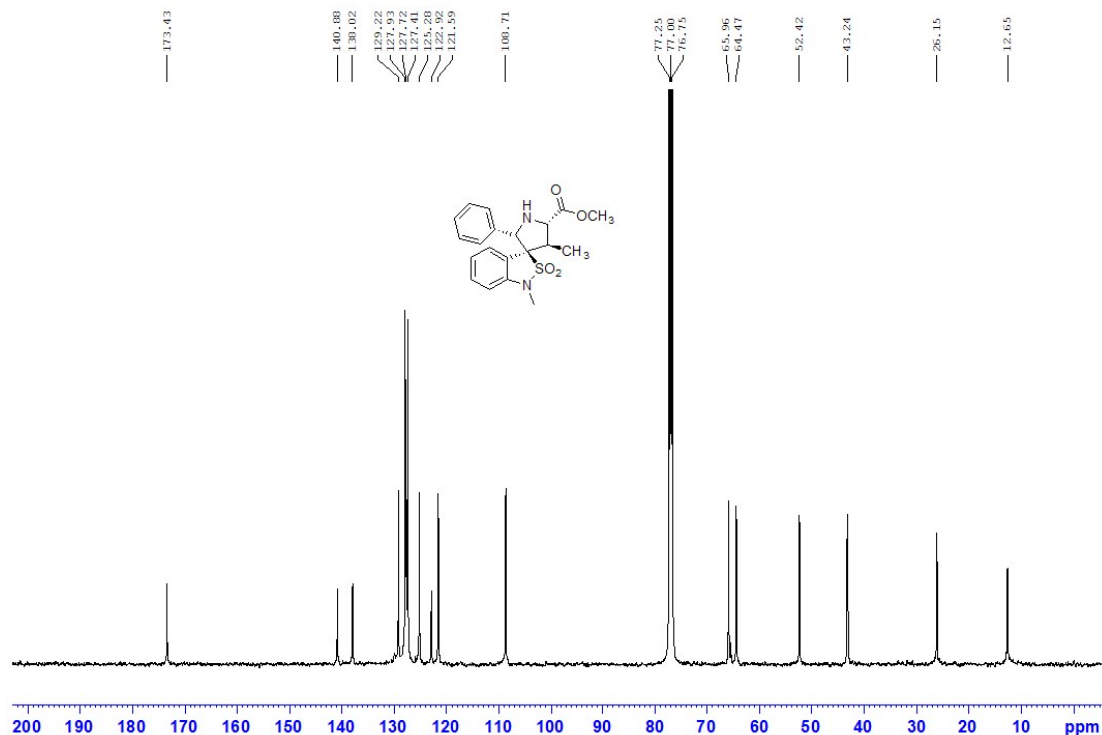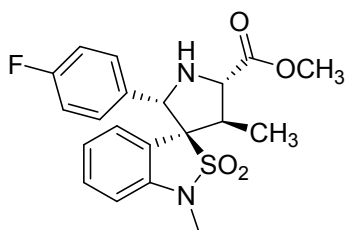

(2'*S*,3*S*,4'*R*,5'*S*)-1,4'-dimethyl-2'-(4-fluorophenyl)-5'-methoxycarbonyl-1*H*-spiro[benzo[*c*]isothiazole- 3,3'-pyrrolidine]-2,2-dioxide (**3ab**)

<sup>1</sup>H NMR (500 MHz, CDCl<sub>3</sub>): δ 7.20 (t, 1H, *J* = 7.7 Hz), 7.02-7.00 (m, 2H), 6.80 (t, 1H, *J* = 7.6 Hz), 6.76 (t, 2H, *J* = 8.7 Hz), 6.54 (d, 1H, *J* = 8.0 Hz), 6.47 (d, 1H, *J* = 7.4 Hz), 5.14 (s, 1H), 4.02 (d, 1H, *J* = 9.2 Hz), 3.88 (s, 3H), 3.09-3.05 (m, 1H), 2.94 (s, 3H), 1.44 (d, 3H, *J* = 7.1 Hz). <sup>13</sup>C NMR (125 MHz, CDCl<sub>3</sub>): δ 173.4, 140.7, 133.6, 129.5, 129.4, 129.3, 125.2, 122.8, 121.7, 114.2, 114.0, 108.7, 76.2, 65.4, 64.5, 52.4, 42.9, 26.0, 12.9.; HRMS (ESI-TOF<sup>+</sup>): *m/z* Calcd. for C<sub>20</sub>H<sub>22</sub>FN<sub>2</sub>O<sub>4</sub>S [(M+H)<sup>+</sup>]: 405.1284. Found: 405.1284. Chiral HPLC (Daicel Chiralpak AD-H, 30% IPA/hexanes, 1 mL/min, λ = 254 nm) *t*<sub>R</sub>(major) = 11.057 min, *t*<sub>R</sub>(minor) = 8.536 min; [α]<sub>D</sub><sup>25</sup> = -28.3° (c = 0.25, CH<sub>2</sub>Cl<sub>2</sub>).

#### <sup>1</sup>H NMR Spectrum of **3ab**

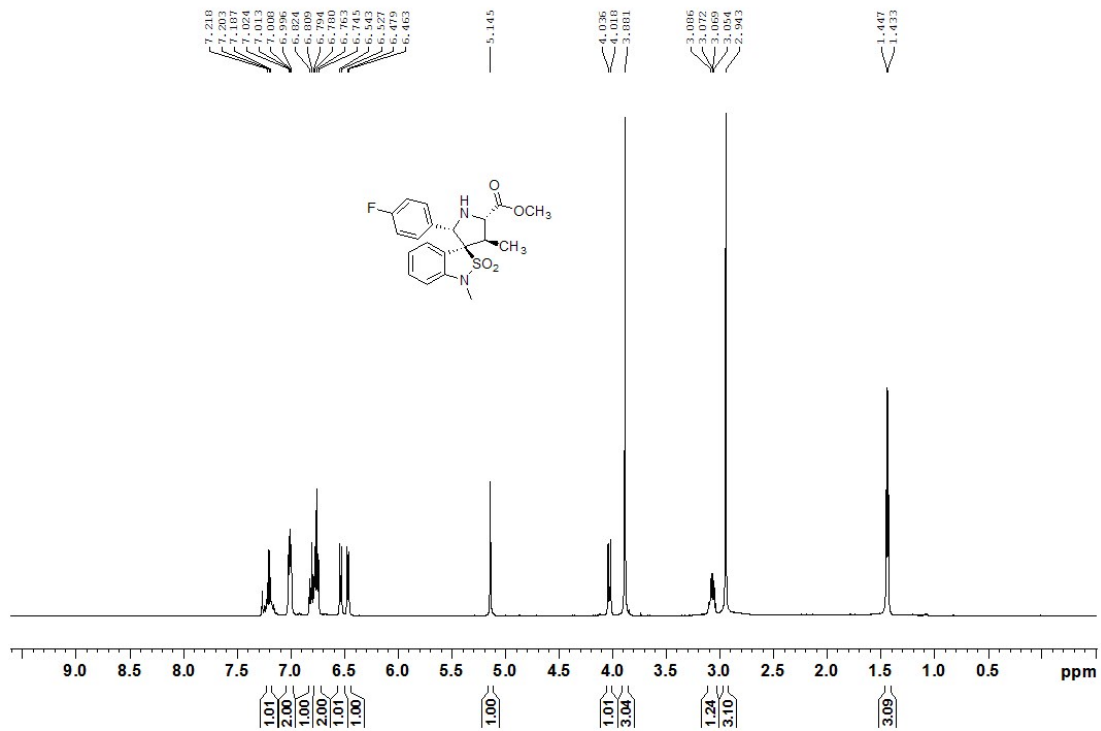

**<sup>13</sup>C NMR Spectrum of 3ab**

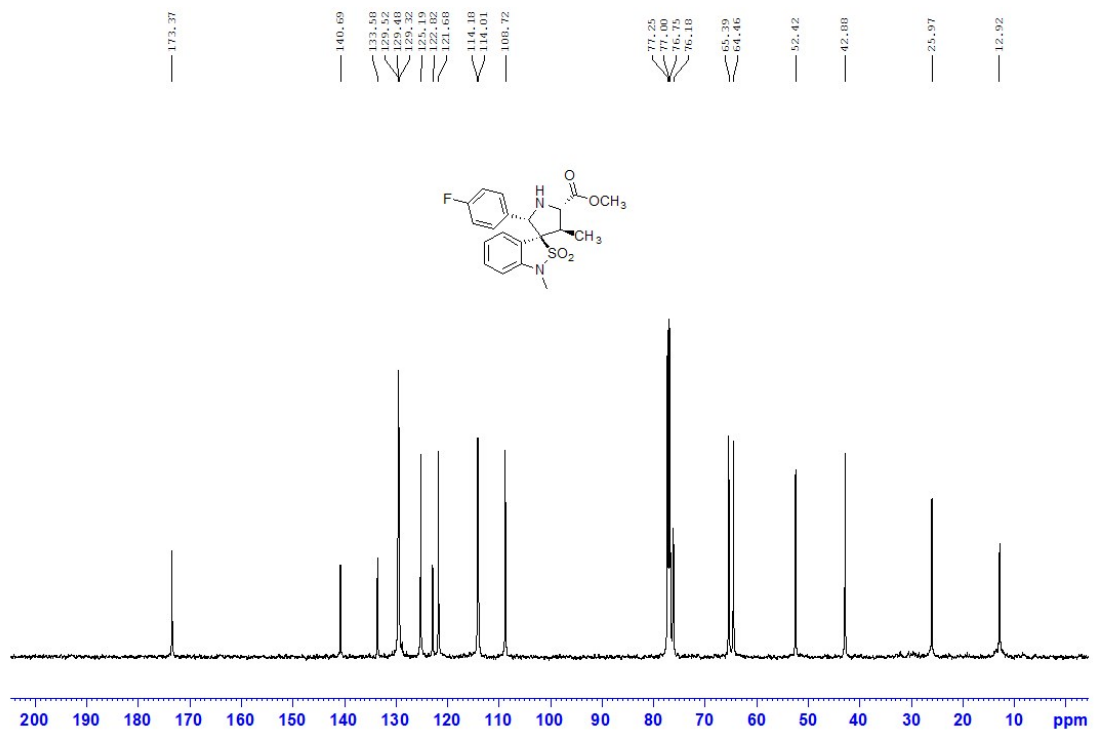

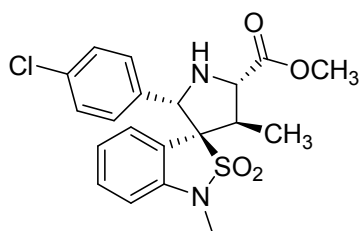

(2'*S*,3*S*,4'*R*,5'*S*)-1,4'-dimethyl-2'-(4-chlorophenyl)-5'-methoxycarbonyl-1*H*-  
 spiro[benzo[*c*]isothiazole-3,3'-pyrrolidine]-2,2-dioxide (**3ac**)

<sup>1</sup>H NMR (500 MHz, CDCl<sub>3</sub>): δ 7.19 (t, 1H, *J* = 7.7 Hz), 7.04-6.95 (m, 4H), 6.80 (t, 1H, *J* = 7.6 Hz), 6.54 (d, 1H, *J* = 7.9 Hz), 6.46 (d, 1H, *J* = 7.6 Hz), 5.12 (s, 1H), 4.01 (d, 1H, *J* = 9.3 Hz), 3.87 (s, 3H), 3.08-3.02 (m, 1H), 2.94 (s, 3H), 1.41 (d, 3H, *J* = 7.0 Hz). <sup>13</sup>C NMR (125 MHz, CDCl<sub>3</sub>): δ 173.4, 140.7, 136.5, 133.5, 129.4, 129.3, 127.4, 125.2, 122.7, 121.8, 108.8, 76.2, 65.4, 64.5, 52.5, 42.9, 26.0, 12.8.; HRMS (ESI-TOF<sup>+</sup>): *m/z* Calcd. for C<sub>20</sub>H<sub>22</sub>ClN<sub>2</sub>O<sub>4</sub>S [(M+H)<sup>+</sup>]: 421.0989. Found: 421.0988. Chiral HPLC (Daicel Chiralpak AD-H, 30% IPA/hexanes, 1 mL/min, λ = 254 nm) *t*<sub>R</sub>(major) = 11.143 min, *t*<sub>R</sub>(minor) = 8.749 min; [α]<sub>D</sub><sup>25</sup> = -40.7° (c = 0.28, CH<sub>2</sub>Cl<sub>2</sub>).

### <sup>1</sup>H NMR Spectrum of **3ac**

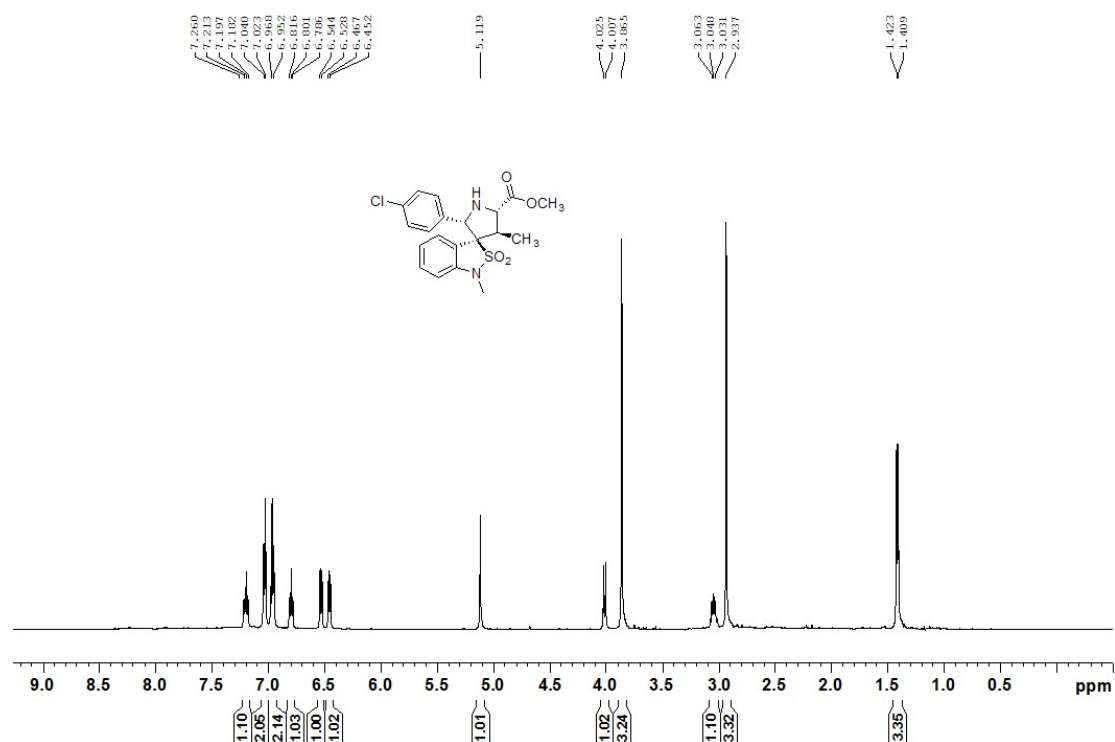

### <sup>13</sup>C NMR Spectrum of **3ac**

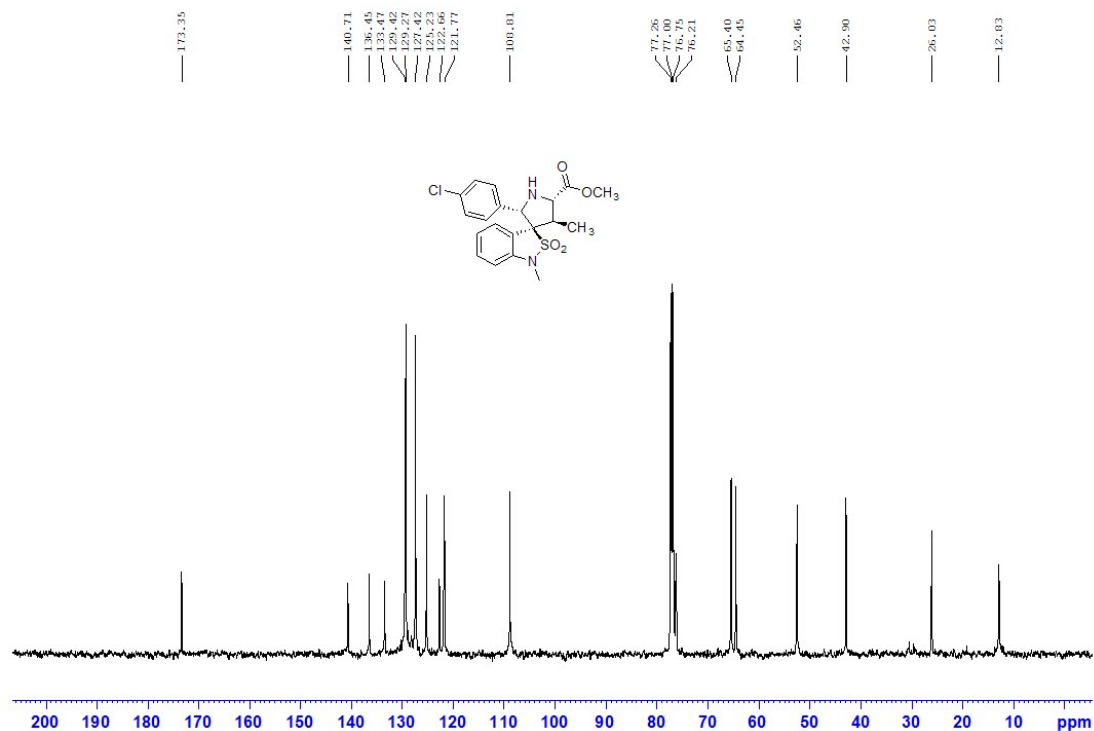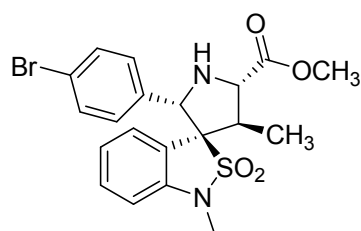

(2'*S*,3*S*,4'*R*,5'*S*)-1,4'-dimethyl-2'-(4-bromophenyl)-5'-methoxycarbonyl-1*H*-spiro[benzo[*c*]isothiazole-3,3'-pyrrolidine]-2,2-dioxide (**3ad**)

<sup>1</sup>H NMR (500 MHz, CDCl<sub>3</sub>): δ 7.26-7.19 (m, 3H), 6.91 (d, 2H, *J* = 7.7 Hz), 6.82 (t, 1H, *J* = 7.5 Hz), 6.55 (d, 1H, *J* = 7.9 Hz), 6.46 (d, 1H, *J* = 7.5 Hz), 5.11 (s, 1H), 4.03 (d, 1H, *J* = 8.9 Hz), 3.88 (s, 3H), 3.08-3.02 (m, 1H), 2.96 (s, 3H), 1.42 (d, 3H, *J* = 6.8 Hz). <sup>13</sup>C NMR (125 MHz, CDCl<sub>3</sub>): δ 173.4, 140.8, 137.1, 130.4, 129.7, 129.5, 125.3, 122.7, 121.8, 108.8, 76.2, 65.5, 64.5, 52.5, 42.9, 26.1, 12.8.; HRMS (ESI-TOF<sup>+</sup>): *m/z* Calcd. for C<sub>20</sub>H<sub>22</sub>BrN<sub>2</sub>O<sub>4</sub>S [(*M*+*H*)<sup>+</sup>]: 465.0484. Found: 465.0481. Chiral HPLC (Daicel Chiralpak AD-H, 30% IPA/hexanes, 1 mL/min, λ = 254 nm) *t*<sub>R</sub>(major) = 12.087 min, *t*<sub>R</sub>(minor) = 9.789 min; [α]<sub>D</sub><sup>25</sup> = -43.4° (c = 0.42, CH<sub>2</sub>Cl<sub>2</sub>).

**<sup>1</sup>H NMR Spectrum of 3ad**





(2'S,3S,4'R,5'S)-1,4'-dimethyl-2'-(*p*-tolyl)-5'-methoxycarbonyl-1*H*-spiro[benzo[*c*]isothiazole-3,3'-pyrrolidine]-2,2-dioxide (**3ae**)

<sup>1</sup>H NMR (500 MHz, CDCl<sub>3</sub>): δ 7.19 (t, 1H, *J* = 7.8 Hz), 6.90 (s, 4H), 6.77 (t, 1H, *J* = 7.6 Hz), 6.53 (d, 1H, *J* = 7.9 Hz), 6.39 (d, 1H, *J* = 7.7 Hz), 5.14 (s, 1H), 4.04 (d, 1H, *J* = 9.3 Hz), 3.88 (s, 3H), 3.09-3.05 (m, 1H), 2.95 (s, 3H), 2.24 (s, 3H), 1.42 (d, 3H, *J* = 7.0 Hz). <sup>13</sup>C NMR (125 MHz, CDCl<sub>3</sub>): δ 173.5, 140.9, 137.3, 134.9, 129.1, 128.1, 127.8, 125.3, 123.1, 121.5, 108.7, 65.8, 64.4, 52.4, 43.4, 26.2, 21.0, 12.7.; HRMS (ESI-TOF<sup>+</sup>): *m/z* Calcd. for C<sub>21</sub>H<sub>25</sub>N<sub>2</sub>O<sub>4</sub>S [(M+H)<sup>+</sup>]: 401.1535. Found: 401.1544. Chiral HPLC (Daicel Chiralpak AD-H, 30% IPA/hexanes, 1 mL/min, λ = 254 nm) *t*<sub>R</sub>(major) = 12.582 min, *t*<sub>R</sub>(minor) = 9.020 min; [α]<sup>25</sup><sub>D</sub> = -45.3° (c = 0.36, CH<sub>2</sub>Cl<sub>2</sub>).

### <sup>1</sup>H NMR Spectrum of **3ae**

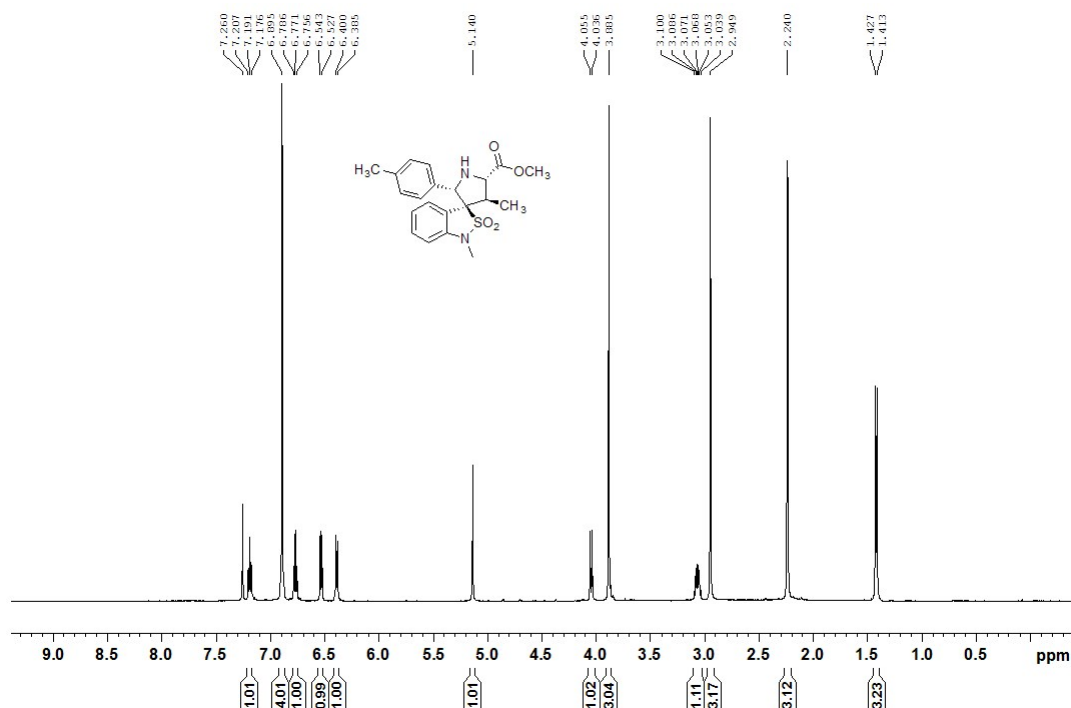

### <sup>13</sup>C NMR Spectrum of **3ae**

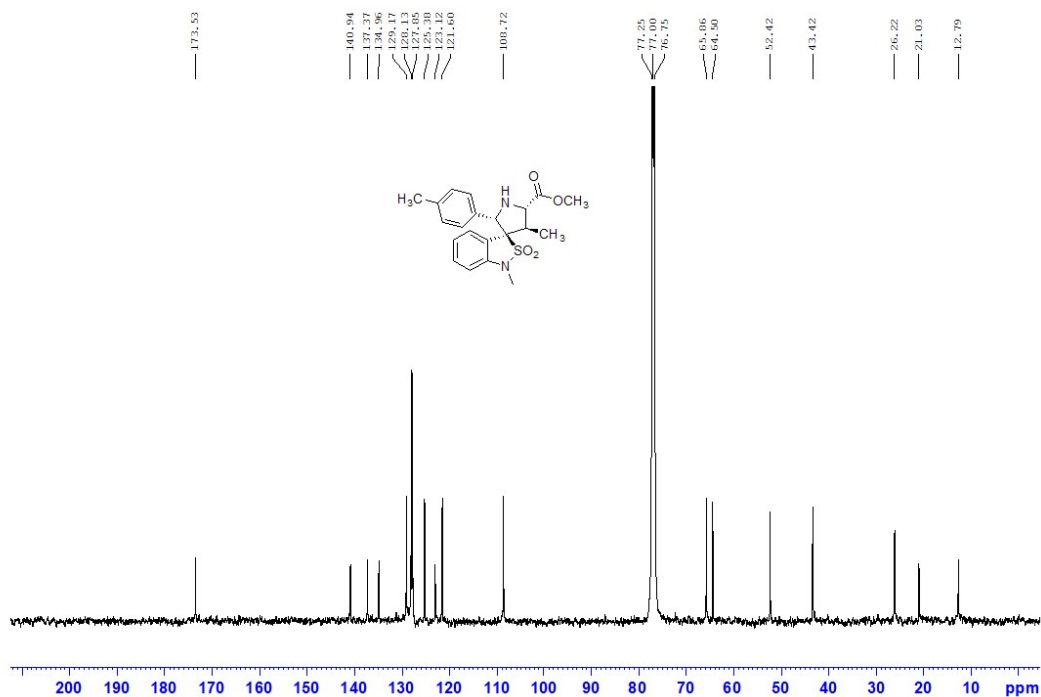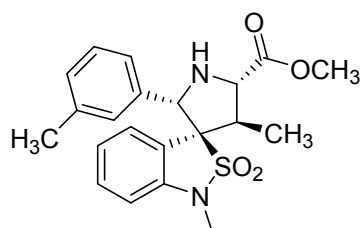

(2'*S*,3*S*,4'*R*,5'*S*)-1,4'-dimethyl-2'-(*m*-tolyl)-5'-methoxycarbonyl-1*H*-spiro[benzo[*c*]isothiazole-3,3'-pyrrolidine]-2,2-dioxide (**3af**)

<sup>1</sup>H NMR (500 MHz, CDCl<sub>3</sub>): δ 7.19 (t, 1H, *J* = 7.3 Hz), 7.01-6.94 (m, 2H), 6.87 (d, 1H, *J* = 7.5 Hz), 6.78-6.75 (m, 2H), 6.54 (d, 1H, *J* = 7.9 Hz), 6.35 (d, 1H, *J* = 7.7 Hz), 5.14 (s, 1H), 4.06 (d, 1H, *J* = 9.4 Hz), 3.89 (s, 3H), 3.11-3.05 (m, 1H), 2.96 (s, 3H), 2.14 (s, 3H), 1.42 (d, 3H, *J* = 7.0 Hz). <sup>13</sup>C NMR (125 MHz, CDCl<sub>3</sub>): δ 173.5, 140.8, 137.9, 136.9, 129.2, 128.5, 128.3, 127.3, 125.3, 125.1, 122.9, 121.5, 108.7, 65.9, 64.4, 52.4, 43.1, 26.2, 21.2, 12.7; HRMS (ESI-TOF<sup>+</sup>): *m/z* Calcd. for C<sub>21</sub>H<sub>25</sub>N<sub>2</sub>O<sub>4</sub>S [(M+H)<sup>+</sup>]: 401.1538. Found: 401.1534. Chiral HPLC (Daicel Chiralpak AD-H, 10% IPA/hexanes, 1 mL/min, λ = 254 nm) *t*<sub>R</sub>(major) = 20.100 min, *t*<sub>R</sub>(minor) = 7.738 min; [α]<sup>25</sup><sub>D</sub> = -30.4° (c = 0.28, CH<sub>2</sub>Cl<sub>2</sub>).

### <sup>1</sup>H NMR Spectrum of **3af**

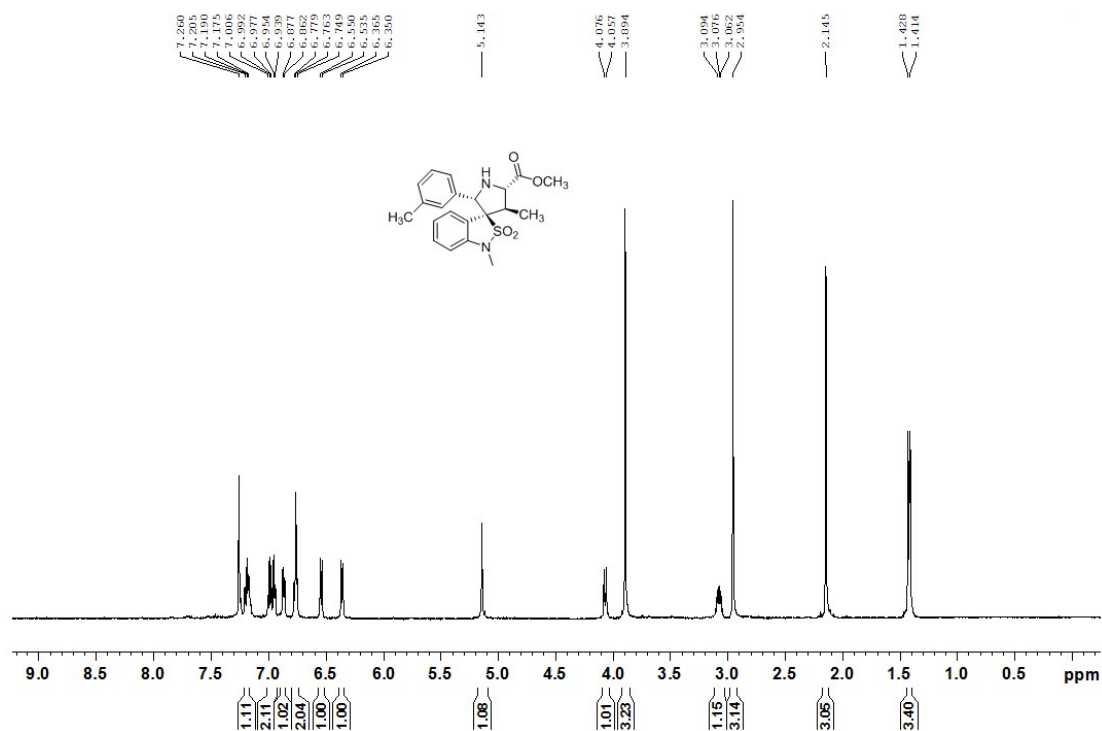

**<sup>13</sup>C NMR Spectrum of 3af**

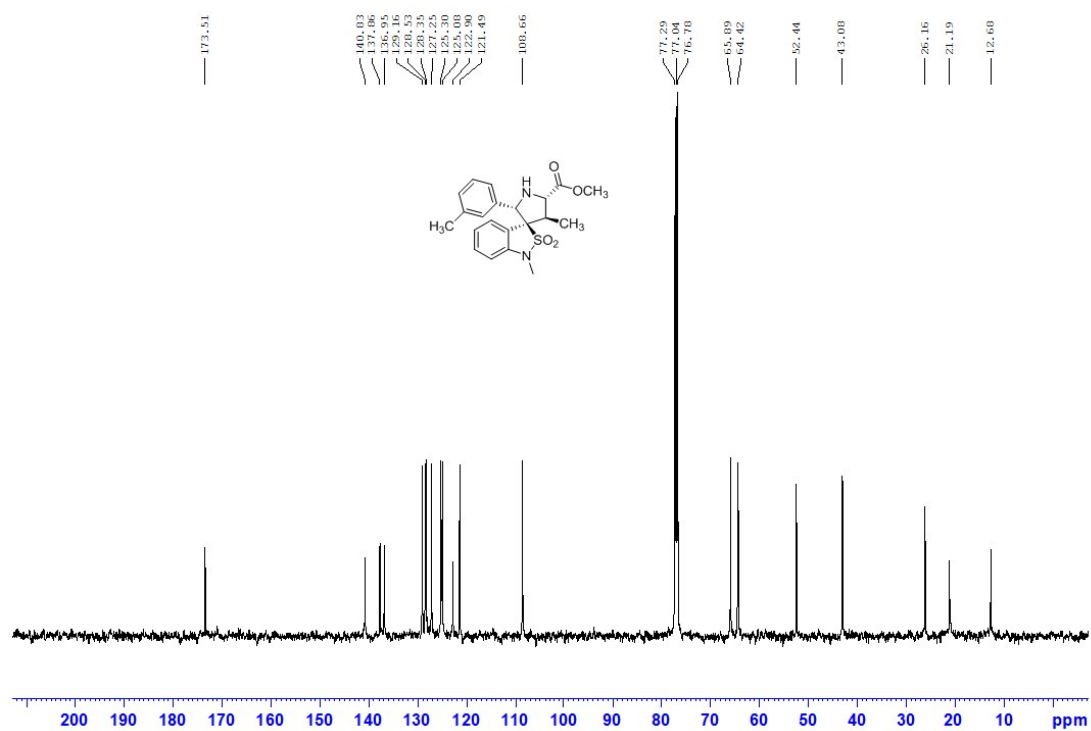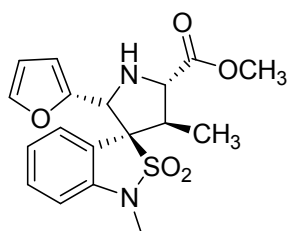

(2'S,3S,4'R,5'S)-1,4'-dimethyl-2'-(furan-2-yl)-5'-methoxycarbonyl-1*H*-spiro[benzo[*c*]isothiazole-3,3'-pyrrolidine]-2,2-dioxide (**3ag**)

<sup>1</sup>H NMR (500 MHz, CDCl<sub>3</sub>): δ 7.26-7.24 (m, 2H), 6.78 (t, 1H, *J* = 7.6 Hz), 6.67 (d, 1H, *J* = 7.9 Hz), 6.36 (d, 1H, *J* = 2.5 Hz), 6.29 (s, 1H), 6.05 (d, 1H, *J* = 7.7 Hz), 5.25 (s, 1H), 4.09 (d, 1H, *J* = 10.0 Hz), 3.84 (s, 3H), 3.23-3.18 (m, 1H), 3.11 (s, 3H), 1.31 (d, 3H, *J* = 7.1 Hz). <sup>13</sup>C NMR (125 MHz, CDCl<sub>3</sub>): δ 173.8, 152.7, 142.0, 141.1, 129.5, 124.2, 121.8, 121.2, 110.6, 109.8, 108.8, 63.0, 59.2, 52.4, 44.8, 26.5, 11.2.; HRMS (ESI-TOF<sup>+</sup>): *m/z* Calcd. for C<sub>18</sub>H<sub>21</sub>N<sub>2</sub>O<sub>5</sub>S [(M+H)<sup>+</sup>]: 377.1171. Found: 377.1172. Chiral HPLC (Daicel Chiralpak AD-H, 20% IPA/hexanes, 0.8 mL/min, λ = 254 nm) *t*<sub>R</sub>(major) = 25.329 min, *t*<sub>R</sub>(minor) = 23.234 min; [α]<sub>D</sub><sup>25</sup> = -42.6° (c = 0.32, CH<sub>2</sub>Cl<sub>2</sub>).

### <sup>1</sup>H NMR Spectrum of 3ag

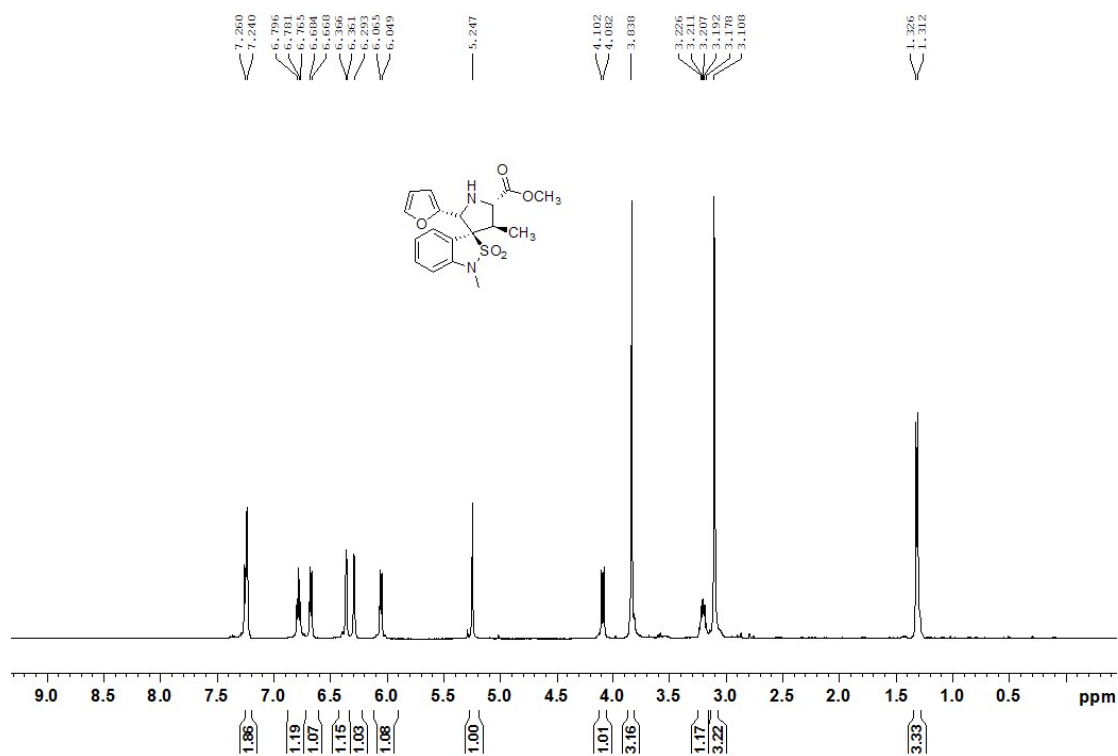

### <sup>13</sup>C NMR Spectrum of 3ag

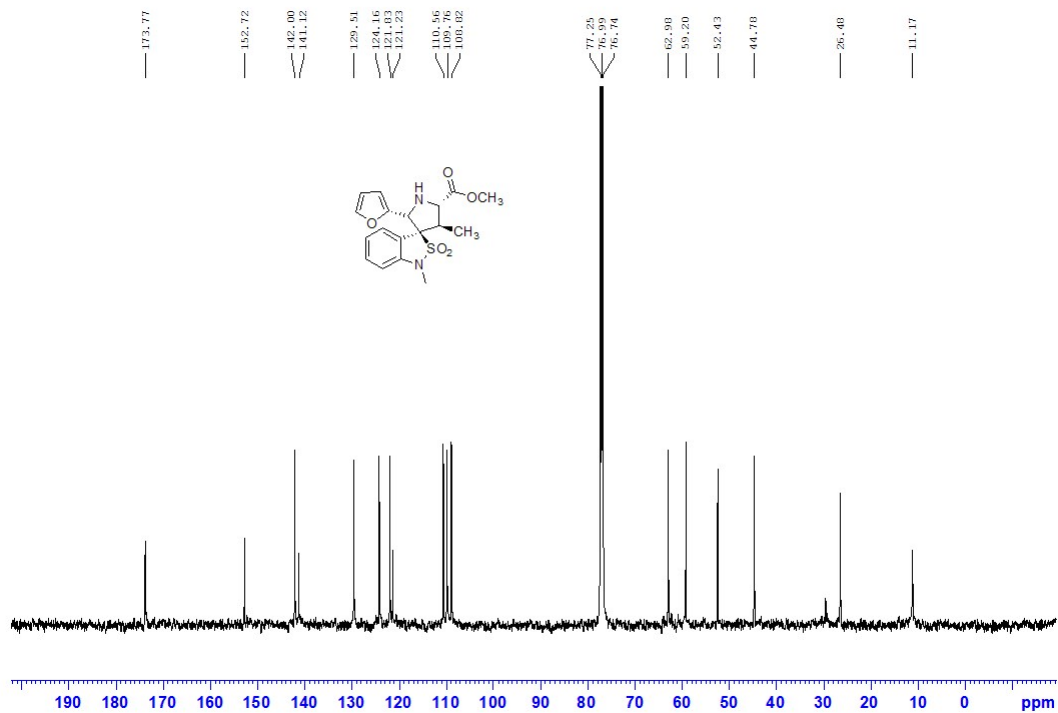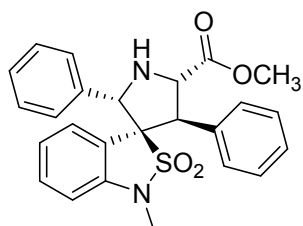

(2'*S*,3*S*,4'*R*,5'*S*)-1-methyl-2,4'-diphenyl-5'-methoxycarbonyl-1*H*-spiro[benzo[*c*]isothiazole-3,3'-pyrrolidine]-2,2-dioxide (**3ba**)

$^1\text{H}$  NMR (500 MHz,  $\text{CDCl}_3$ ):  $\delta$  7.28-7.26 (m, 5H), 7.19-7.10 (m, 6H), 6.95-6.89 (m, 2H), 6.29 (d, 1H,  $J = 7.9$  Hz), 5.48 (s, 1H), 4.69 (s, 1H), 4.15 (d, 1H,  $J = 8.7$  Hz), 3.80 (s, 3H), 2.98 (br, 1H), 2.57 (s, 3H).  $^{13}\text{C}$  NMR (125 MHz,  $\text{CDCl}_3$ ):  $\delta$  172.8, 140.6, 136.4, 135.9, 129.3, 128.2, 128.1, 128.0, 127.3, 125.6, 124.8, 121.6, 108.7, 67.9, 64.7, 55.6, 52.6, 26.0.; HRMS (ESI-TOF $^+$ ):  $m/z$  Calcd. for  $\text{C}_{25}\text{H}_{25}\text{N}_2\text{O}_4\text{S}$  [( $\text{M}+\text{H}$ ) $^+$ ]: 449.1535. Found: 449.1536. Chiral HPLC (Daicel Chiralpak AD-H, 20% IPA/hexanes, 0.8 mL/min,  $\lambda = 254$  nm)  $t_{\text{R}}$ (major) = 39.815 min,  $t_{\text{R}}$ (minor) = 29.564 min;  $[\alpha]_{\text{D}}^{25} = -70.4^\circ$  ( $c = 0.47$ ,  $\text{CH}_2\text{Cl}_2$ ).

### $^1\text{H}$ NMR Spectrum of **3ba**

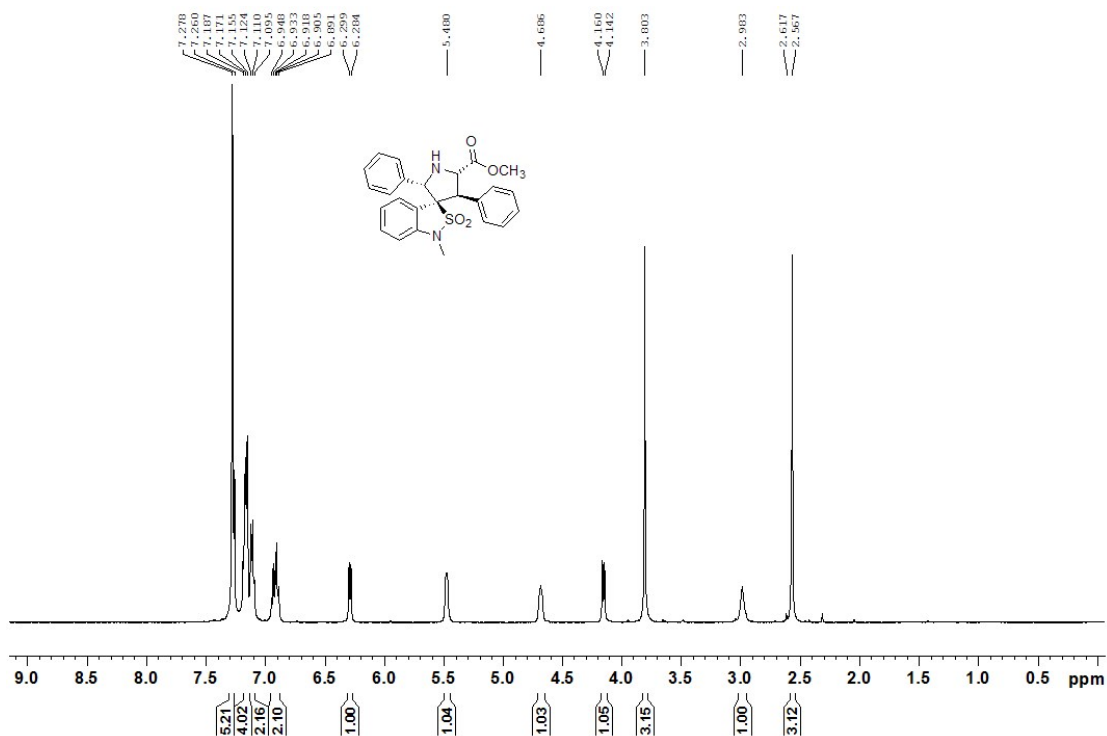

<sup>13</sup>C NMR Spectrum of 3ba

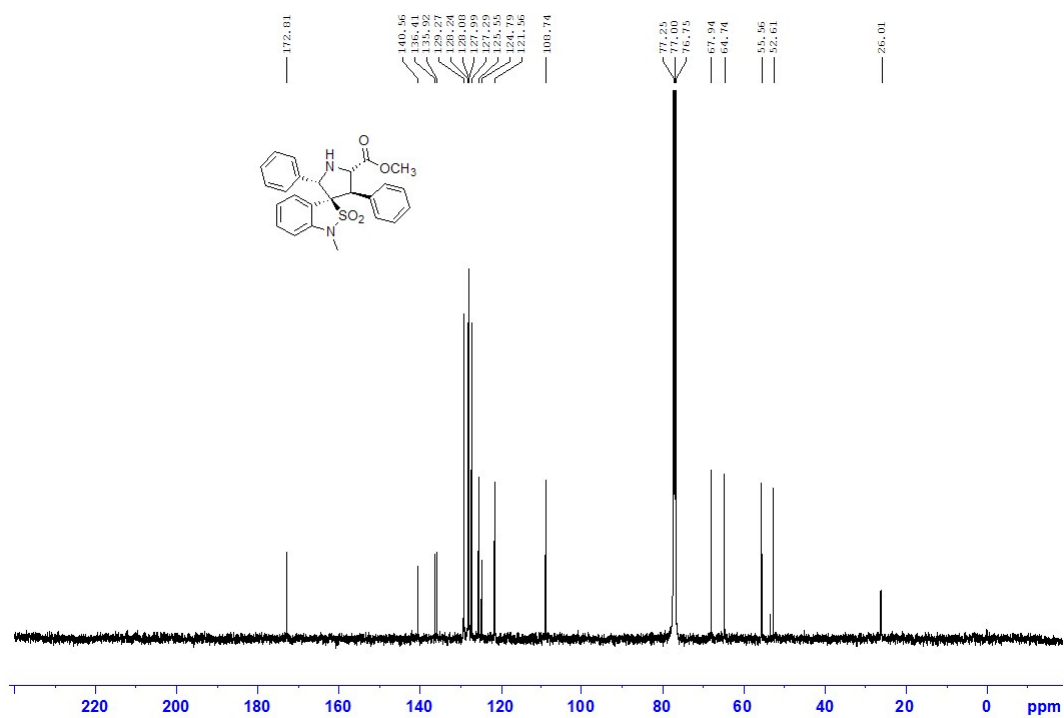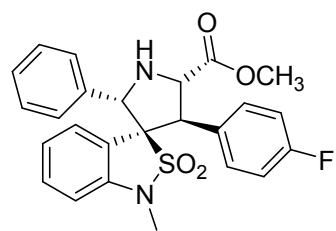

(2'*S*,3*S*,4'*R*,5'*S*)-4'-(4-fluorophenyl)-1-methyl-2'-phenyl--5'-methoxycarbonyl-1*H*-spiro[benzo[*c*]indole]

isothiazole-3,3'-pyrrolidine]-2,2-dioxide (**3ca**)

$^1\text{H}$  NMR (500 MHz,  $\text{CDCl}_3$ ):  $\delta$  7.26-7.14 (m, 8H), 6.94 (t, 2H,  $J = 0.87$  Hz), 6.89 (t, 1H,  $J = 7.7$  Hz), 6.73 (d, 1H,  $J = 7.6$  Hz), 6.31 (d, 1H,  $J = 7.9$  Hz), 5.48 (s, 1H), 4.67 (d, 1H,  $J = 9.0$  Hz), 4.11 (d, 1H,  $J = 9.0$  Hz), 3.80 (s, 3H), 2.61 (s, 3H).  $^{13}\text{C}$  NMR (125 MHz,  $\text{CDCl}_3$ )  $\delta$  172.7, 140.6, 136.8, 131.0, 129.4, 128.3, 128.1, 127.4, 125.6, 124.3, 121.6, 115.0, 114.9, 108.8, 67.1, 64.2, 54.9, 52.6, 26.1.; HRMS (ESI-TOF $^+$ ):  $m/z$  Calcd. for  $\text{C}_{25}\text{H}_{24}\text{FN}_2\text{O}_4\text{S}$  [(M+H) $^+$ ]: 467.1441. Found: 467.1446. Chiral HPLC (Daicel Chiralpak AD-H, 30% IPA/hexanes, 0.9 mL/min,  $\lambda = 254$  nm)  $t_{\text{R}}$ (major) = 30.036 min,  $t_{\text{R}}$ (minor) = 26.885 min;  $[\alpha]_{\text{D}}^{25} = -20.5^\circ$  ( $c = 0.18$ ,  $\text{CH}_2\text{Cl}_2$ ).

### $^1\text{H}$ NMR Spectrum of **3ca**

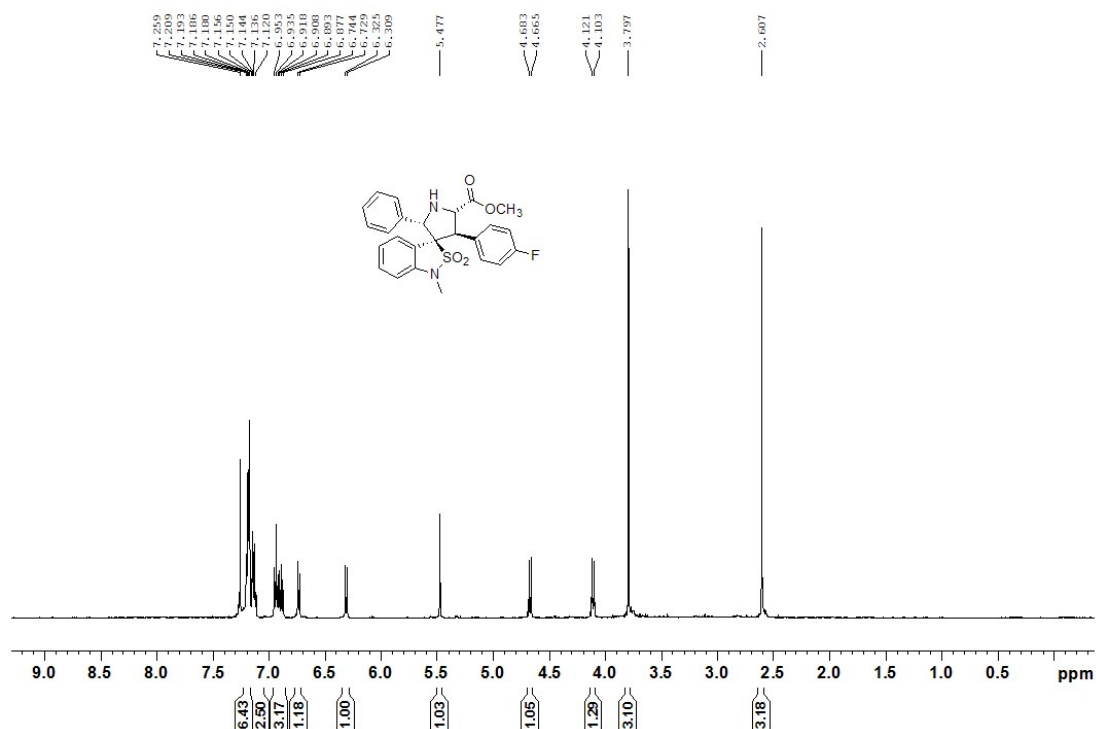

### $^{13}\text{C}$ NMR Spectrum of **3ca**

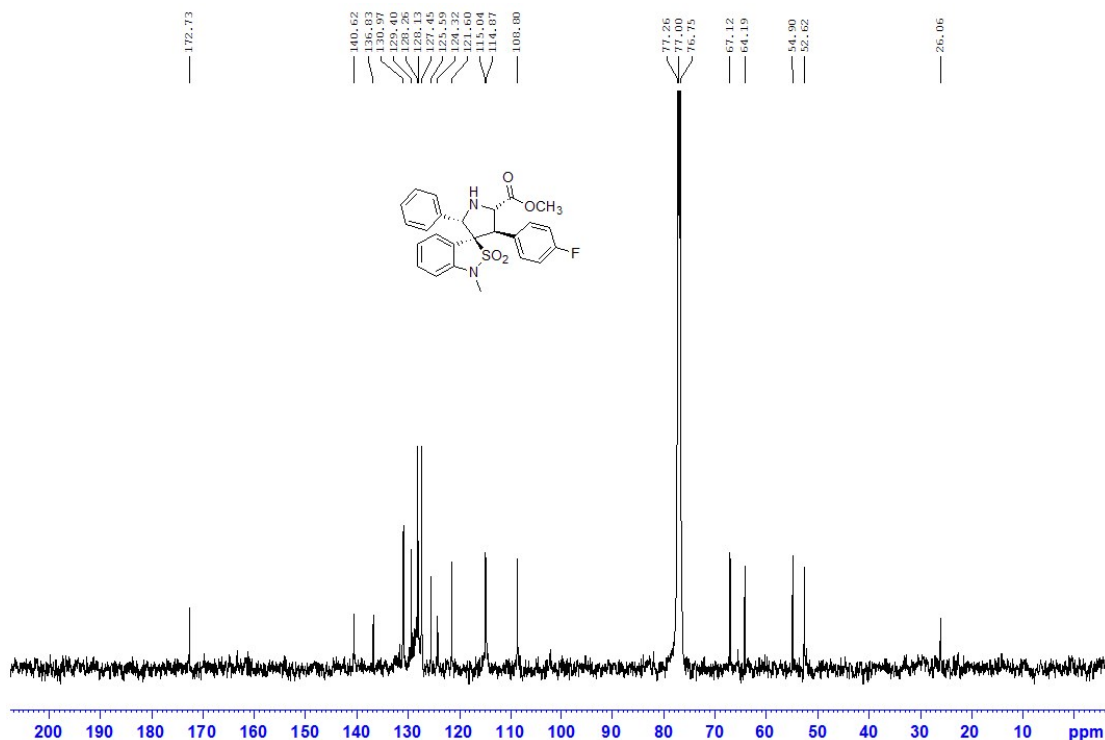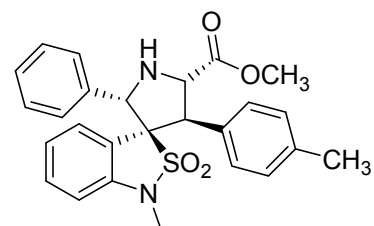

(2'*S*,3*S*,4'*R*,5'*S*)-1-methyl-2'-phenyl-4'-(*p*-tolyl)-5'-methoxycarbonyl-1*H*-spiro[benzo[*c*]isothiazole-3,3'-pyrrolidine]-2,2-dioxide (**3da**)

<sup>1</sup>H NMR (500 MHz, CDCl<sub>3</sub>): δ 7.21-7.07 (m, 10H), 6.98-6.93 (m, 2H), 6.28 (d, 1H, *J* = 7.9 Hz), 5.45 (s, 1H), 4.63 (d, 1H, *J* = 8.3 Hz), 4.13 (d, 1H, *J* = 8.5 Hz), 3.80 (s, 3H), 2.97 (br, 1H), 2.58 (s, 3H), 2.32 (s, 3H). <sup>13</sup>C NMR (125 MHz, CDCl<sub>3</sub>): δ 172.9, 140.6, 137.6, 136.3, 133.1, 129.3, 129.2, 128.9, 128.3, 128.0, 127.2, 125.6, 125.0, 121.5, 108.7, 68.3, 65.2, 55.2, 52.6, 26.0, 21.2.; HRMS (ESI-TOF<sup>+</sup>): *m/z* Calcd. for C<sub>26</sub>H<sub>28</sub>N<sub>2</sub>O<sub>4</sub>S [(M+H)<sup>+</sup>]: 463.1692. Found: 463.1688. Chiral HPLC (Daicel Chiralpak AD-H, 20% IPA/hexanes, 0.8 mL/min, λ = 254 nm) *t<sub>R</sub>*(major) = 43.559 min, *t<sub>R</sub>*(minor) = 41.731 min; [α]<sub>D</sub><sup>25</sup> = -90.9° (c = 0.57, CH<sub>2</sub>Cl<sub>2</sub>).

**<sup>1</sup>H NMR Spectrum of 3da**



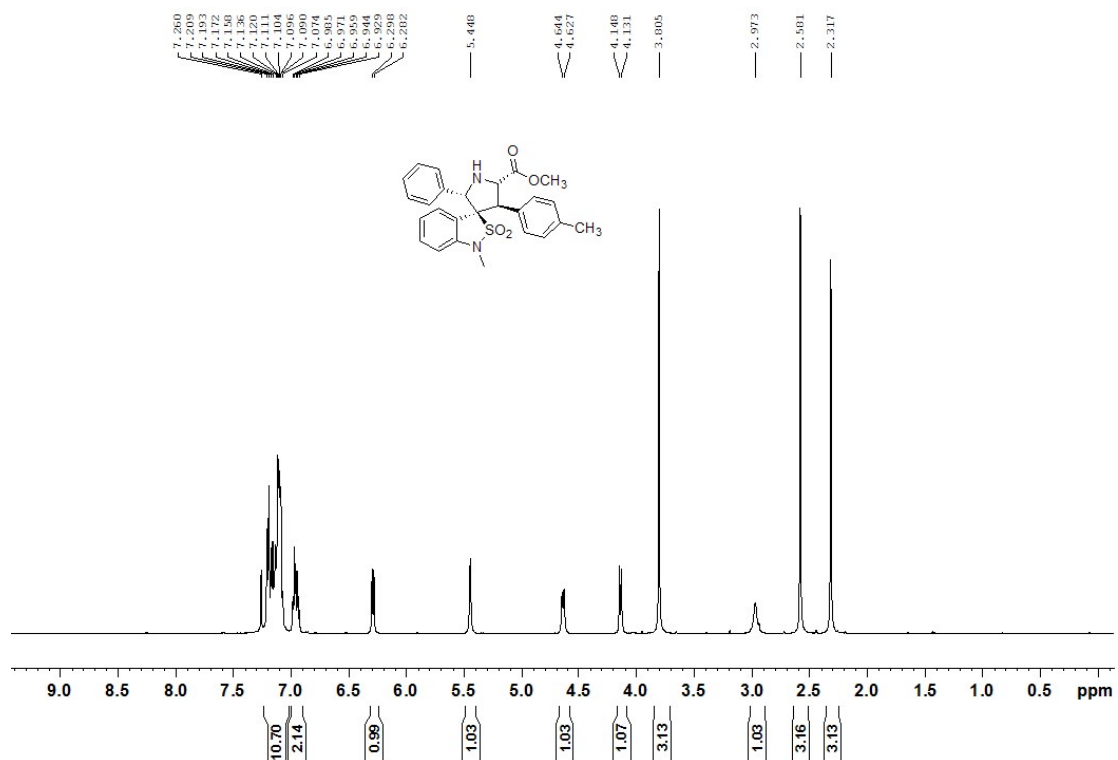

**<sup>13</sup>C NMR Spectrum of 3da**

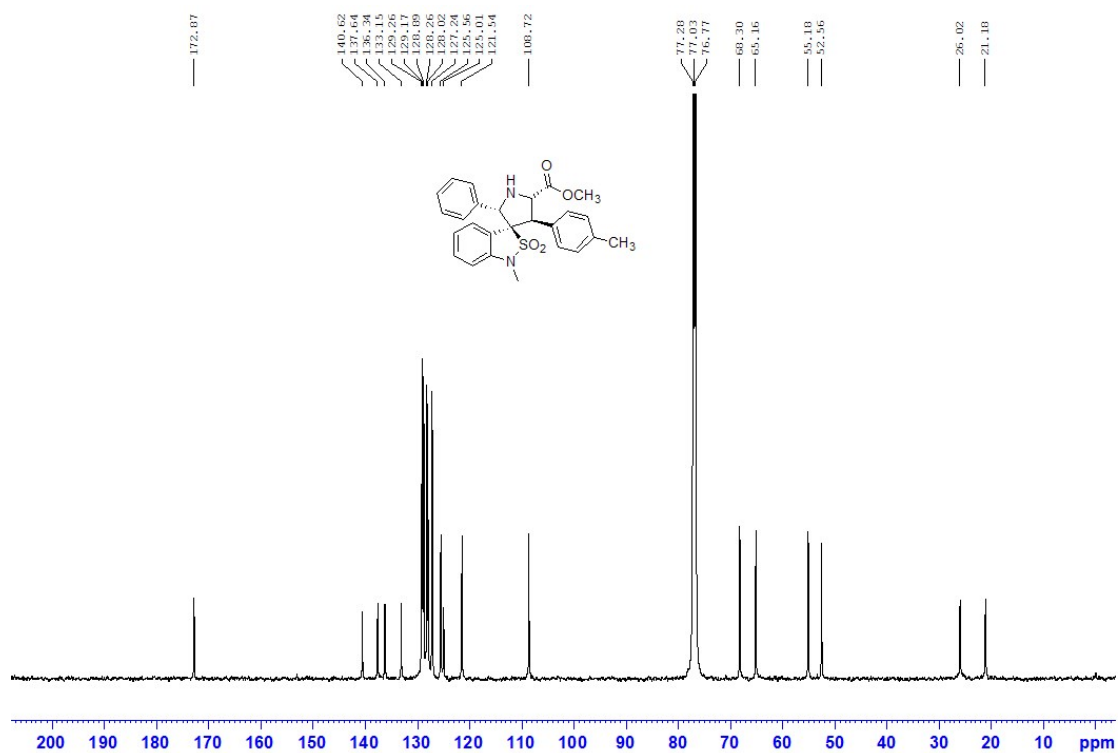

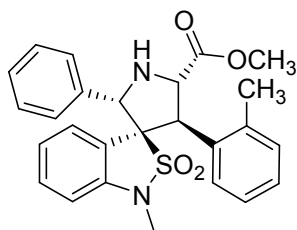

(2'*S*,3*S*,4'*R*,5'*S*)-1-methyl-2'-phenyl-4'-(*o*-tolyl)-5'-methoxycarbonyl-1*H*-  
 spiro[benzo[*c*]isothiazole-3,3'-pyrrolidine]-2,2-dioxide (**3ea**)

<sup>1</sup>H NMR (500 MHz, CDCl<sub>3</sub>): δ 7.76 (d, 1H, *J* = 7.8 Hz), 7.54 (d, 1H, *J* = 7.5 Hz), 7.37 (t, 1H, *J* = 7.6 Hz), 7.23 (t, 1H, *J* = 7.5 Hz), 7.20-7.15 (m, 2H), 7.11-7.07 (m, 2H), 6.99-6.98 (m, 4H), 6.19 (d, 1H, *J* = 7.8 Hz), 5.38 (d, 1H, *J* = 4.4 Hz), 4.66 (d, 1H, *J* = 7.2 Hz), 4.50 (s, 1H), 3.84 (s, 3H), 2.85 (br, 1H), 2.54 (s, 3H), 2.26 (s, 3H). <sup>13</sup>C NMR (125 MHz, CDCl<sub>3</sub>): δ 172.7, 140.1, 138.0, 137.0, 134.1, 130.2, 129.3, 128.2, 128.0, 127.9, 127.8, 126.7, 126.4, 126.2, 124.9, 121.6, 108.3, 75.7, 71.2, 67.6, 52.6, 49.0, 25.4, 20.4; HRMS (ESI-TOF<sup>+</sup>): *m/z* Calcd. for C<sub>26</sub>H<sub>27</sub>N<sub>2</sub>O<sub>4</sub>S [(M+H)<sup>+</sup>]: 463.1692. Found: 463.1702. Chiral HPLC (Daicel Chiralpak AD-H, 30% IPA/hexanes, 0.9 mL/min, λ = 254 nm) *t*<sub>R</sub>(major) = 19.522 min, *t*<sub>R</sub>(minor) = 17.436 min; [α]<sub>D</sub><sup>25</sup> = -72.1° (c = 0.28, CH<sub>2</sub>Cl<sub>2</sub>).

<sup>1</sup>H NMR Spectrum of **3ea**

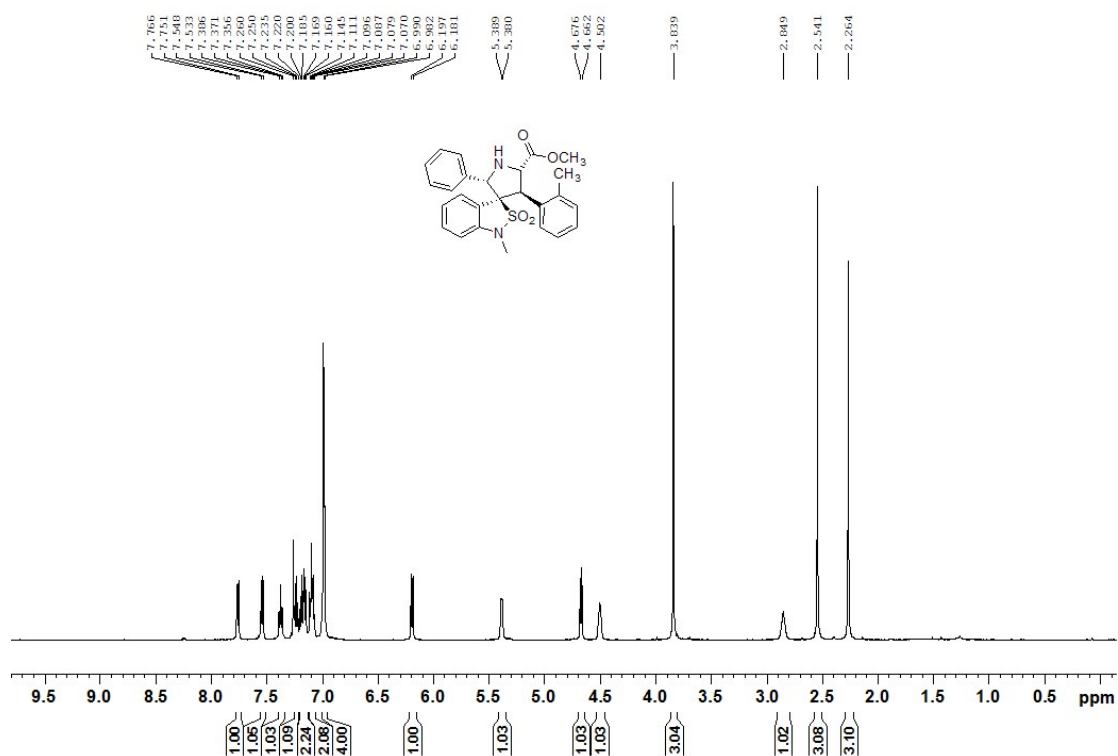

<sup>13</sup>C NMR Spectrum of **3ea**

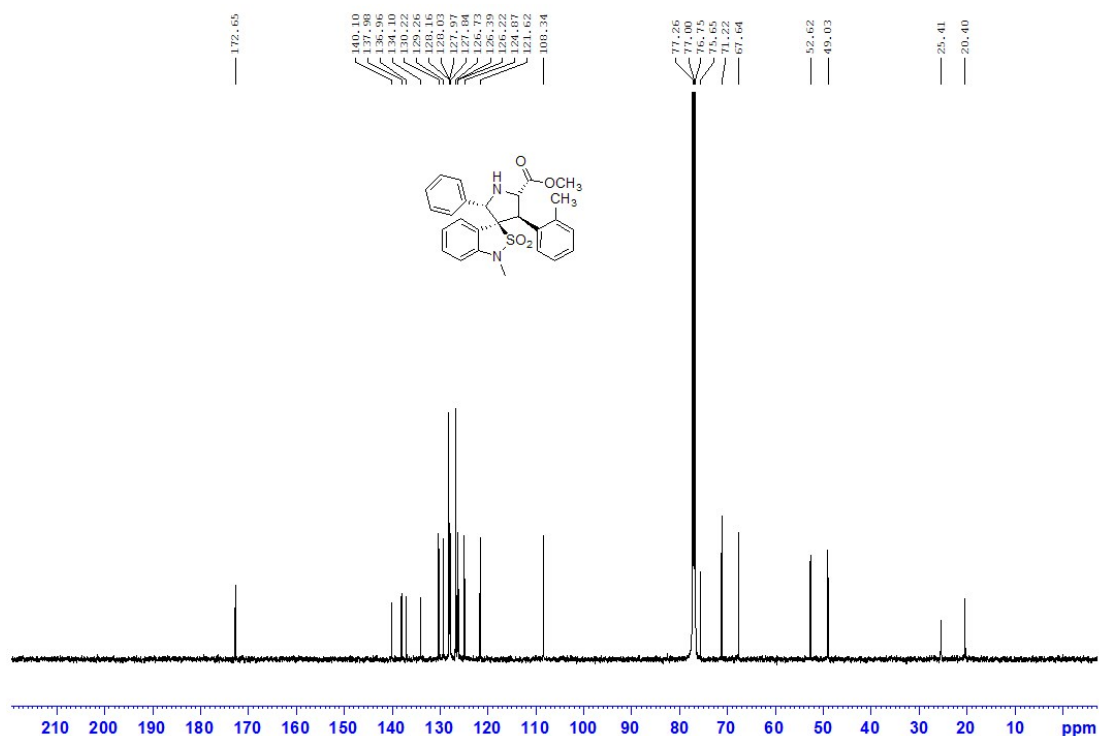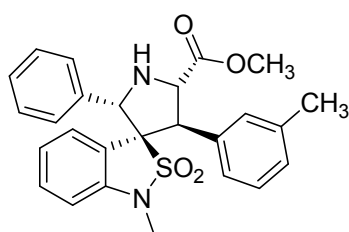

(2'S,3S,4'R,5'S)-1-methyl-2'-phenyl-4'-(m-tolyl)-5'-methoxycarbonyl-1H-spiro[benzo[c]isothiazole-3,3'-pyrrolidine]-2,2-dioxide (**3fa**)

<sup>1</sup>H NMR (500 MHz, CDCl<sub>3</sub>): δ 7.22-7.08 (m, 9H), 7.04 (s, 1H), 6.99-6.94 (m, 2H), 6.28 (d, 1H, J = 7.9 Hz), 5.46 (s, 1H), 4.64 (d, 1H, J = 8.4 Hz), 4.12 (d, 1H, J = 8.5 Hz), 3.81 (s, 3H), 2.97 (br, 1H), 2.56 (s, 3H), 2.29 (s, 3H). <sup>13</sup>C NMR (125 MHz, CDCl<sub>3</sub>): δ 172.8, 140.5, 137.6, 136.1, 130.2, 129.3, 128.8, 128.2, 128.0, 127.2, 126.2, 125.5, 125.0, 121.5, 108.6, 68.3, 65.1, 55.4, 52.6, 26.0, 21.4.; HRMS (ESI-TOF<sup>+</sup>): m/z Calcd. for C<sub>26</sub>H<sub>27</sub>N<sub>2</sub>O<sub>4</sub>S [(M+H)<sup>+</sup>]: 463.1692. Found: 463.1696. Chiral HPLC (Daicel Chiralpak AD-H, 30% IPA/hexanes, 0.9 mL/min, λ = 254 nm) t<sub>R</sub>(major) = 17.139 min, t<sub>R</sub>(minor) = 11.212 min; [α]<sub>D</sub><sup>25</sup> = -68.6° (c = 0.37, CH<sub>2</sub>Cl<sub>2</sub>).

#### <sup>1</sup>H NMR Spectrum of **3fa**

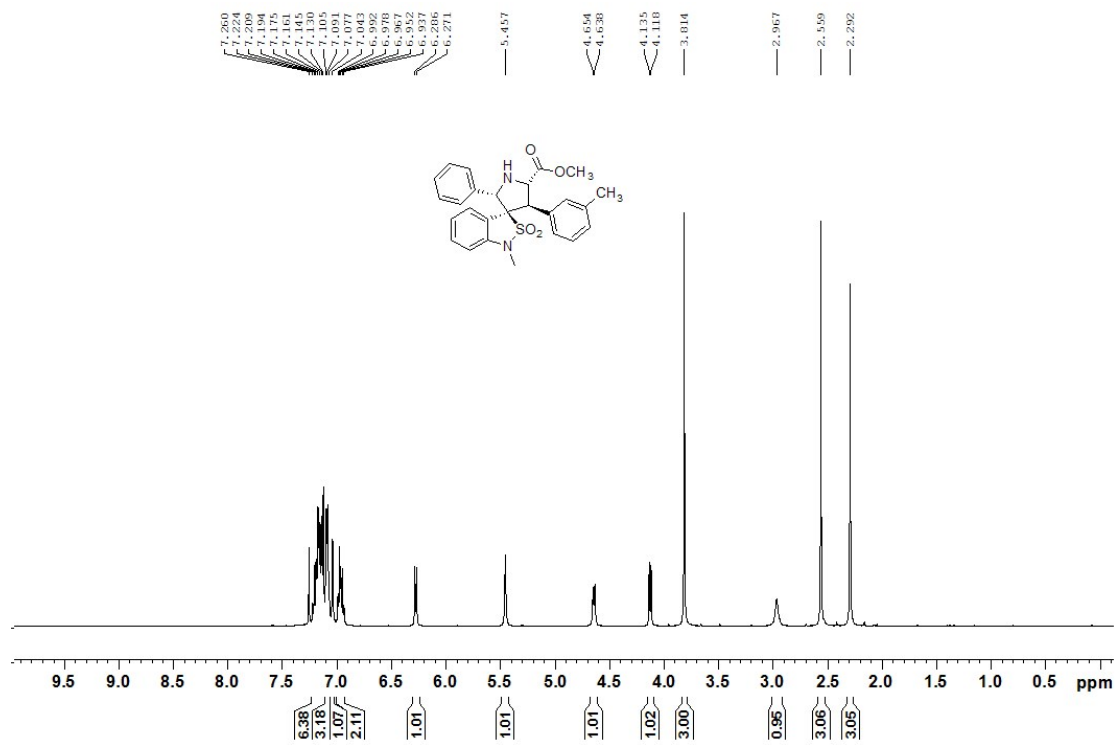

**<sup>13</sup>C NMR Spectrum of 3fa**

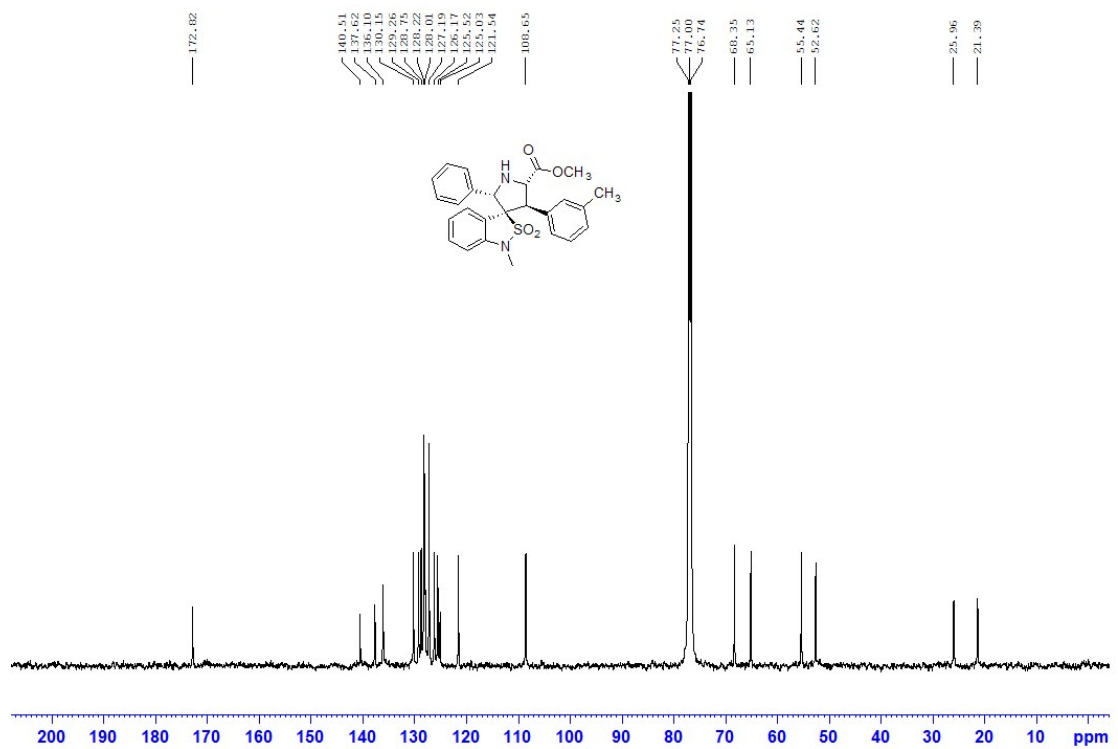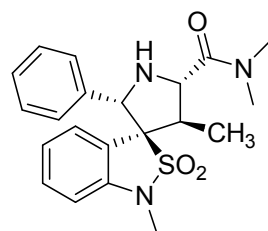

(2'*S*,3*S*,4'*R*,5'*S*)-1-methyl-2'-phenyl-4'-methyl-5'-*N,N*-dimethylaminocarbonyl-1*H*-spiro[benzo[*c*]

isothiazole-3,3'-pyrrolidine]-2,2-dioxide (5aa)

$^1\text{H}$  NMR (500 MHz,  $\text{CDCl}_3$ )  $\delta$  7.17 (t, 1H,  $J = 7.5$  Hz), 7.14-7.05 (m, 5H), 6.73 (t, 1H,  $J = 7.6$  Hz), 6.55 (d, 1H,  $J = 7.9$  Hz), 6.48 (d, 1H,  $J = 7.6$  Hz), 5.21 (s, 1H), 4.30 (d, 1H,  $J = 9.5$  Hz), 3.36-3.30 (m, 1H), 3.22 (s, 3H), 3.11 (s, 3H), 3.00 (s, 3H), 1.32 (d, 3H,  $J = 7.1$  Hz).  $^{13}\text{C}$  NMR (125 MHz,  $\text{CDCl}_3$ ):  $\delta$  171.2, 140.9, 138.1, 129.1, 127.9, 127.8, 127.6, 125.4, 122.9, 121.7, 108.7, 77.5, 66.6, 61.8, 43.8, 37.4, 36.2, 26.2, 12.0.; HRMS (ESI-TOF $^+$ ):  $m/z$  Calcd. for  $\text{C}_{21}\text{H}_{25}\text{N}_3\text{O}_3\text{S}$  [(M+H) $^+$ ]: 400.1695. Found: 400.1691. Chiral HPLC (Daicel Chiralpak AD-H, 25% IPA/hexanes, 0.8 mL/min,  $\lambda = 254$  nm)  $t_R$ (major) = 46.160 min,  $t_R$ (minor) = 18.956 min;  $[\alpha]_D^{25} = -76.3^\circ$  ( $c = 0.38$ ,  $\text{CH}_2\text{Cl}_2$ ).

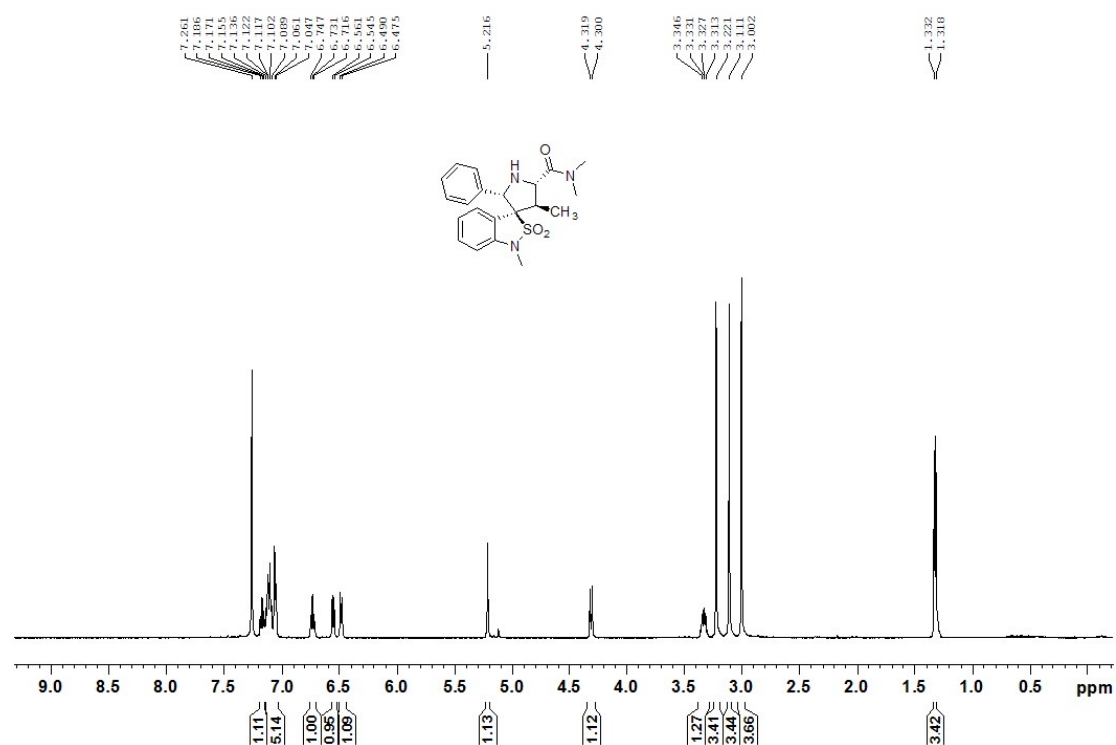

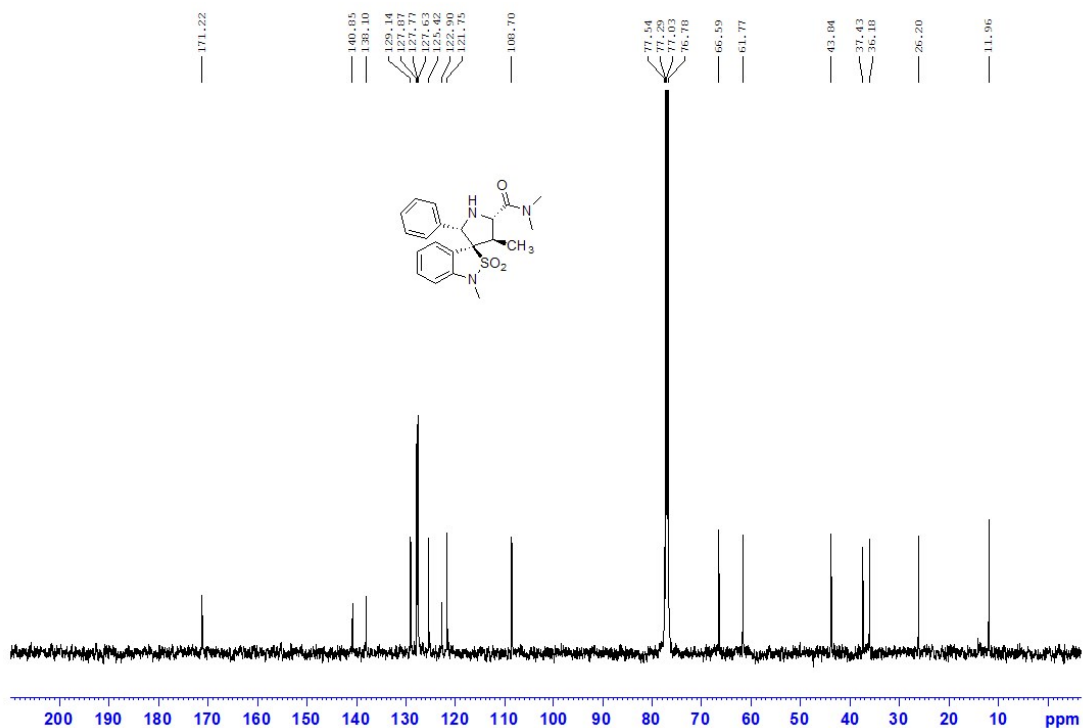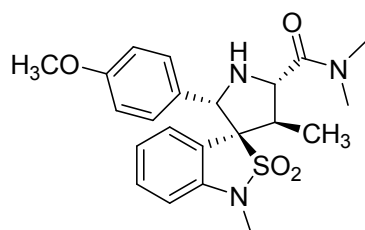

(2'*S*,3*S*,4'*R*,5'*S*)-1-methyl-2'-*p*-methoxyphenyl-4'-methyl-5'-*N,N*-dimethylaminocarbonyl-1*H*-spiro[benzo[*c*]isothiazole-3,3'-pyrrolidine]-2,2-dioxide (5ab)

$^1\text{H}$  NMR (500 MHz,  $\text{CDCl}_3$ ):  $\delta$  7.19 (t, 1H,  $J = 7.7$  Hz), 6.97 (d, 2H,  $J = 8.4$  Hz), 6.78 (t, 1H,  $J = 7.6$  Hz), 6.64 (d, 2H,  $J = 8.5$  Hz), 6.58 (d, 1H,  $J = 7.7$  Hz), 6.55 (d, 1H,  $J = 8.0$  Hz), 5.20 (s, 1H), 4.32 (d, 1H,  $J = 9.2$  Hz), 3.73 (s, 3H), 3.30-3.28 (m, 1H), 3.22 (s, 3H), 3.11 (s, 3H), 2.98 (s, 3H), 1.36 (d, 3H,  $J = 7.1$  Hz).  $^{13}\text{C}$  NMR (125 MHz,  $\text{CDCl}_3$ ):  $\delta$  171.1, 159.1, 140.8, 129.8, 129.1, 129.0, 125.5, 123.0, 121.8, 113.0, 108.7, 66.2, 61.7, 55.1, 43.9, 37.4, 36.2, 26.2, 12.2. HRMS (ESI-TOF $^+$ ):  $m/z$  Calcd. for  $\text{C}_{22}\text{H}_{27}\text{N}_3\text{O}_4\text{S}$  [( $\text{M}+\text{H}$ ) $^+$ ]: 430.1801. Found: 430.1808. Chiral HPLC (Daicel Chiralpak AD-H, 25% IPA/hexanes, 0.8 mL/min,  $\lambda = 254$  nm)  $t_{\text{R}}$ (major) = 33.434 min,  $t_{\text{R}}$ (minor) = 18.395 min;  $[\alpha]_{\text{D}}^{25} = -56.3^\circ$  ( $c = 0.32$ ,  $\text{CH}_2\text{Cl}_2$ ).

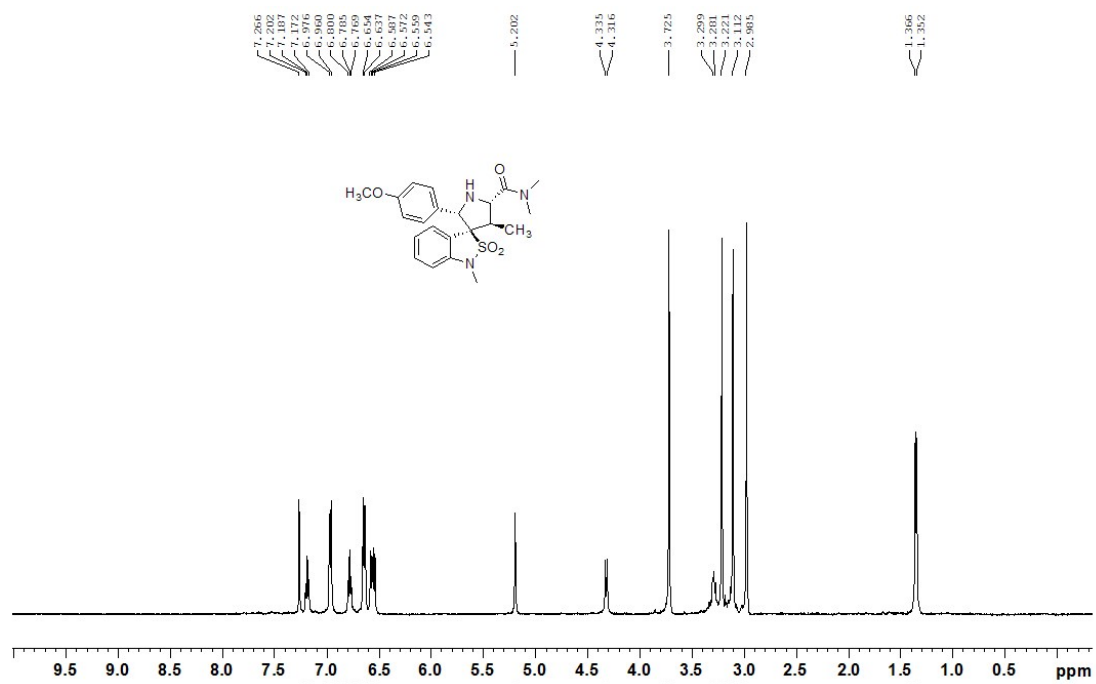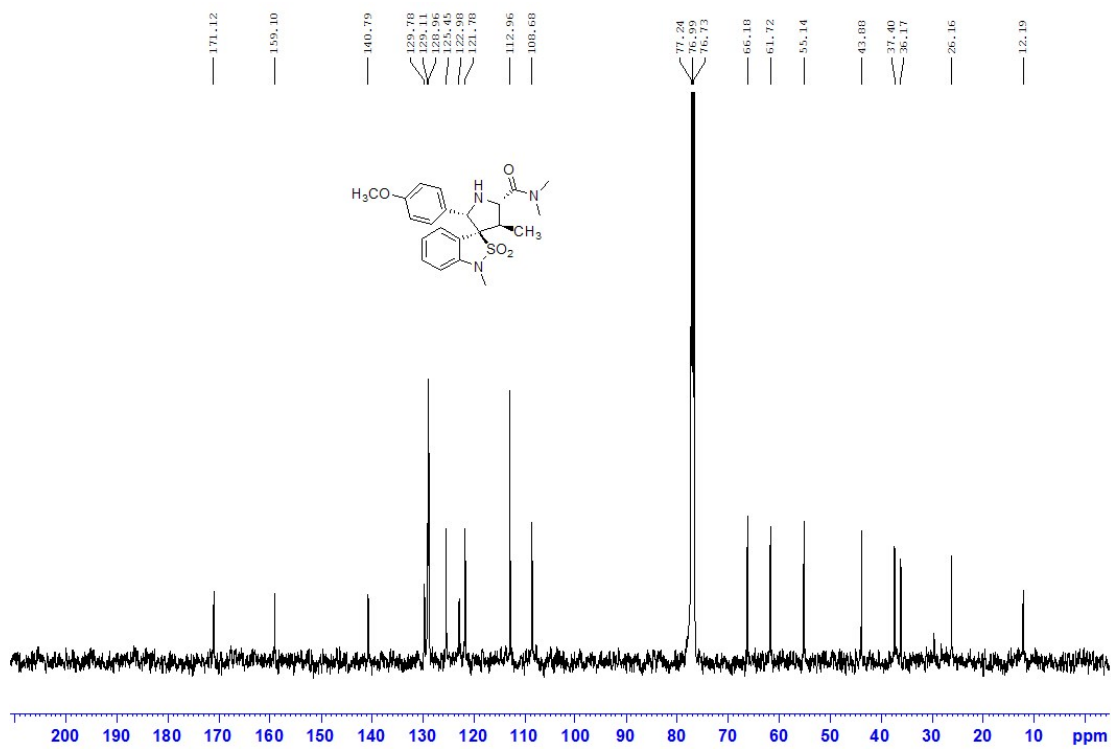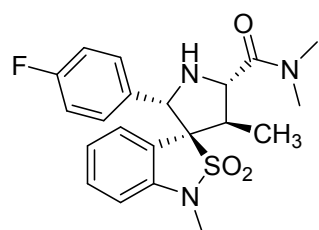

(2'*S*,3*S*,4'*R*,5'*S*)-1-methyl-2-*p*-flouropheryl-4'-methyl-5'-*N,N*-dimethylaminocarbonyl-1*H*-spiro

[benzo[*c*]isothiazole-3,3'-pyrrolidine]-2,2-dioxide (5ac)

<sup>1</sup>H NMR (500 MHz, CDCl<sub>3</sub>): δ 7.14 (t, 1H, *J* = 7.7 Hz), 6.97-6.94 (m, 2H), 6.74-6.71 (m, 3H), 6.52-6.49 (m, 2H), 5.15 (s, 1H), 4.26 (d, 1H, *J* = 9.2 Hz), 3.26-3.23 (m, 1H), 3.15 (s, 3H), 3.05 (s, 3H), 2.92 (s, 3H), 1.29 (d, 3H, *J* = 7.1 Hz). <sup>13</sup>C NMR (125 MHz, CDCl<sub>3</sub>): δ 171.2, 140.8, 133.8, 129.6, 129.5, 129.3, 125.4, 122.8, 121.9, 114.5, 114.3, 108.8, 66.1, 61.8, 43.5, 37.4, 36.2, 26.1, 12.1, HRMS (ESI-TOF<sup>+</sup>): *m/z* Calcd. for C<sub>21</sub>H<sub>24</sub>FN<sub>3</sub>O<sub>3</sub>S [(M+H)<sup>+</sup>]: 418.1601. Found: 418.1607. Chiral HPLC (Daicel Chiralpak AD-H, 25% IPA/hexanes, 0.8 mL/min, λ = 254 nm) *t*<sub>R</sub>(major) = 34.346 min, *t*<sub>R</sub>(minor) = 19.098 min; [α]<sub>D</sub><sup>25</sup> = -62.4° (c = 0.26, CH<sub>2</sub>Cl<sub>2</sub>)

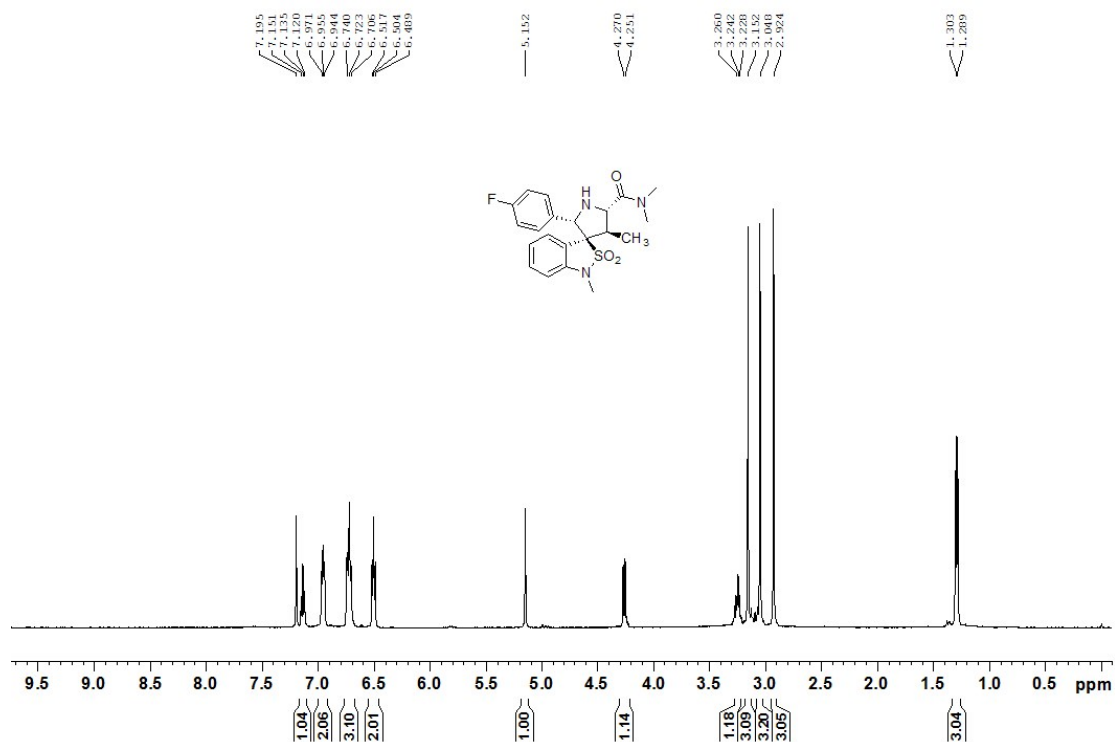



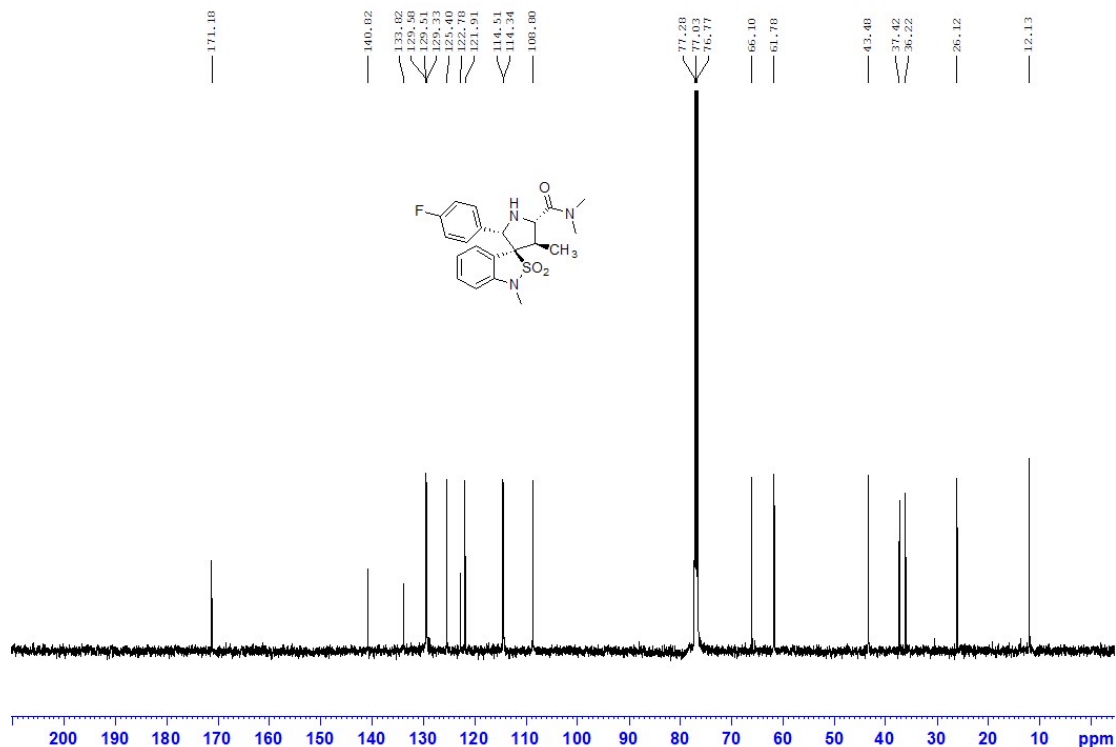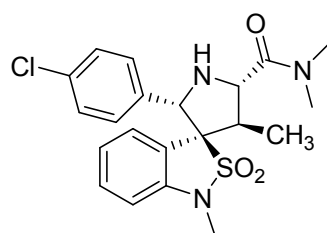

(2'*S*,3*S*,4'*R*,5'*S*)-1-methyl-2'-*p*-chlorophenyl-4'-methyl-5'-*N,N*-dimethylaminocarbonyl-1*H*-spiro [benzo[*c*]isothiazole-3,3'-pyrrolidine]-2,2-dioxide (5ad)

<sup>1</sup>H NMR (500 MHz, CDCl<sub>3</sub>) δ 7.20 (t, 1H, *J* = 7.8 Hz), 7.07-6.97 (m, 4H), 6.79 (t, 1H, *J* = 7.6 Hz), 6.58-6.56 (m, 2H), 5.16 (s, 1H), 4.28 (d, 1H, *J* = 9.4 Hz), 3.32-3.27 (m, 1H), 3.21 (s, 3H), 3.10 (s, 3H), 3.00 (s, 3H), 1.32 (d, 3H, *J* = 7.0 Hz). <sup>13</sup>C NMR (125 MHz, CDCl<sub>3</sub>) δ 171.3, 140.9, 137.0, 133.5, 129.4, 129.3, 127.7, 125.5, 122.7, 122.0, 108.9, 66.2, 61.8, 43.5, 37.5, 36.2, 26.2, 12.0; HRMS (ESI-TOF<sup>+</sup>): *m/z* Calcd. for C<sub>21</sub>H<sub>24</sub>ClN<sub>3</sub>O<sub>3</sub>S [(*M*+*H*)<sup>+</sup>]: 434.1305. Found: 434.1307. Chiral HPLC (Daicel Chiralpak AD-H, 25% IPA/hexanes, 0.8 mL/min, λ = 254 nm) *t*<sub>R</sub>(major) = 30.552 min, *t*<sub>R</sub>(minor) = 18.571 min; [α]<sub>D</sub><sup>25</sup> = -42.1° (c = 0.25, CH<sub>2</sub>Cl<sub>2</sub>)

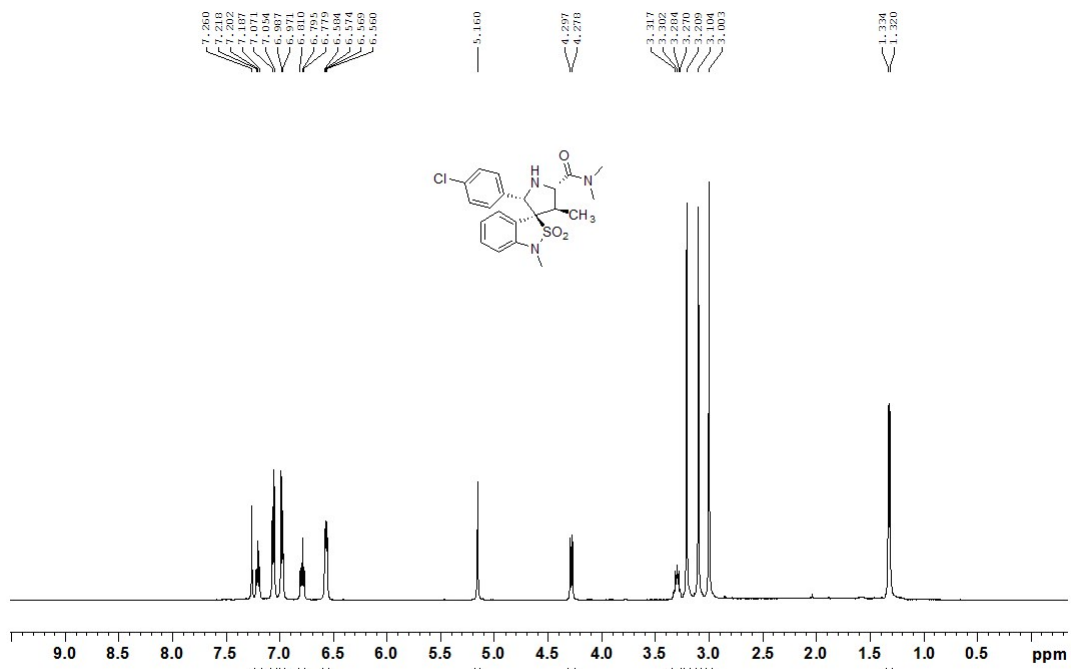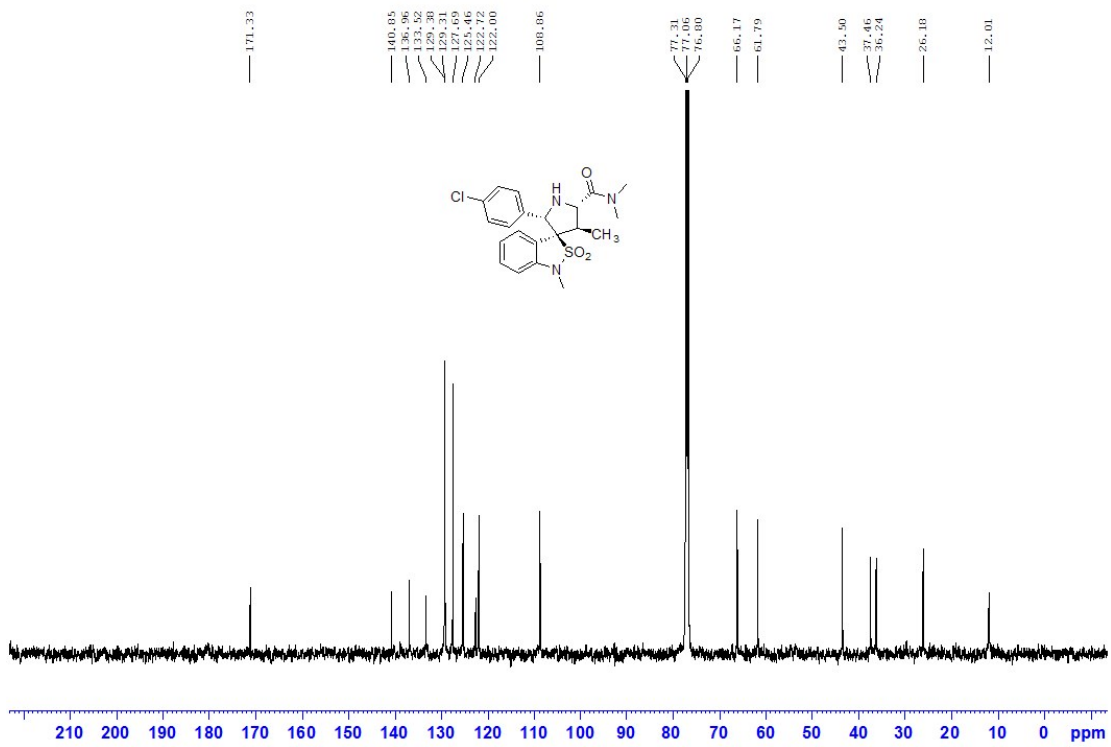

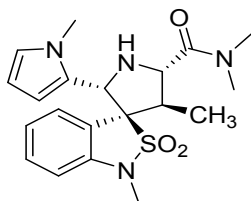

(2'S,3S,4'R,5'S)-N,N,1,4'-tetramethyl-2'-(1-methyl-1H-pyrrol-2-yl)-1H-spiro[benzo[c]isothiazole-3,3'-pyrrolidine]-5'-carboxamide 2,2-dioxide(5ae)

$^1\text{H}$  NMR (500 MHz,  $\text{CDCl}_3$ ):  $\delta$  7.24 (t, 1H,  $J = 7.9$  Hz), 6.72 (t, 1H,  $J = 7.6$  Hz), 6.67-6.66 (m, 2H), 6.45 (s, 1H), 6.12 (s, 1H), 5.79 (d, 1H,  $J = 7.7$  Hz), 5.47 (s, 1H), 4.47 (d, 1H,  $J = 10.8$  Hz), 3.18 (s, 3H), 3.13 (s, 3H), 3.12-3.10 (m, 1H), 3.07 (s, 3H), 2.99 (s, 3H), 1.10 (d, 3H,  $J = 7.1$  Hz).  $^{13}\text{C}$  NMR (125 MHz,  $\text{CDCl}_3$ ):  $\delta$  171.3, 141.2, 130.7, 129.5, 124.8, 122.8, 122.2, 121.5, 109.1, 108.5, 107.6, 77.6, 59.3, 56.8, 47.1, 37.4, 36.1, 33.5, 26.6, 9.5. HRMS (ESI-TOF $^+$ ):  $m/z$  Calcd. for  $\text{C}_{20}\text{H}_{26}\text{N}_4\text{O}_3\text{S}$  [(M+H) $^+$ ]: 403.1804. Found: 403.1804. Chiral HPLC (Daicel Chiralpak AD-H, 25% IPA/hexanes, 0.8 mL/min,  $\lambda = 254$  nm)  $t_{\text{R}}$ (major) = 35.043 min,  $t_{\text{R}}$ (minor) = 22.527 min;  $[\alpha]_{\text{D}}^{25} = -56.4^\circ$  (c = 0.31,  $\text{CH}_2\text{Cl}_2$ )

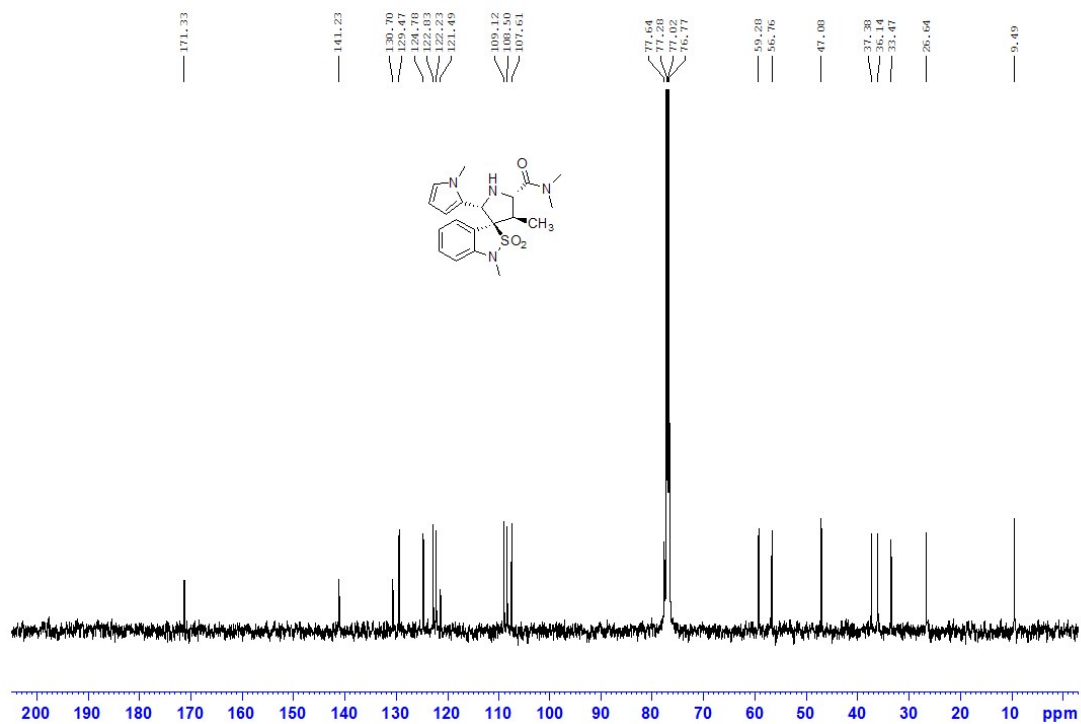

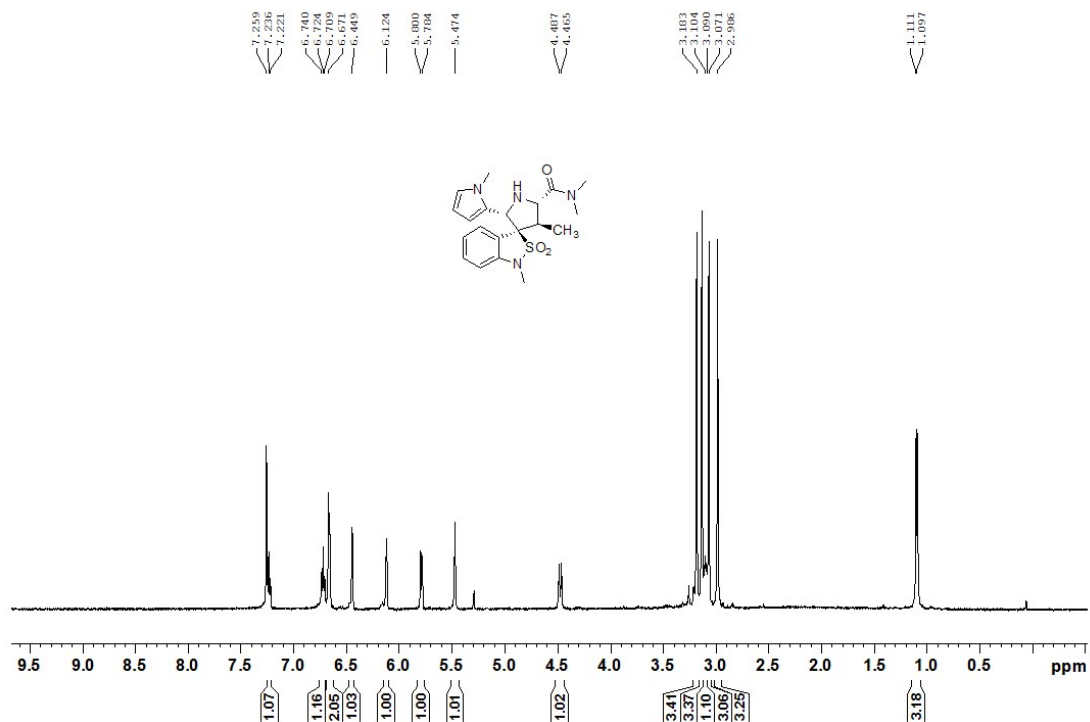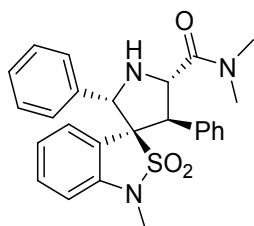

(2'S,3S,4'R,5'S)-N,N,1-trimethyl-2',4'-diphenyl-1H-spiro[benzo[c]isothiazole-3,3'-pyrrolidine]-5'-carboxamide 2,2-dioxide(5ba)

$^1\text{H}$  NMR (500 MHz,  $\text{CDCl}_3$ ):  $\delta$  7.74 (d, 1H,  $J = 7.5$  Hz), 7.54 (d, 2H,  $J = 7.4$  Hz), 7.42-7.36 (m, 3H), 7.21 (t, 1H,  $J = 7.6$  Hz), 7.13-7.11 (m, 2H), 7.04-7.01 (m, 2H), 6.94 (d, 2H,  $J = 7.7$  Hz), 6.22 (d, 1H,  $J = 7.8$  Hz), 5.48 (s, 1H), 4.83 (d, 1H,  $J = 5.9$  Hz), 4.12 (d, 1H,  $J = 6.9$  Hz), 3.07 (s, 3H), 2.64 (s, 3H), 2.54 (s, 3H).  $^{13}\text{C}$  NMR (125 MHz,  $\text{CDCl}_3$ ):  $\delta$  170.9, 140.2, 138.2, 133.7, 129.4, 129.1, 128.7, 128.3, 128.0, 127.9, 127.0, 126.0, 125.3, 121.9, 108.4, 77.6, 71.8, 65.8, 57.8, 37.0, 36.2, 25.6. HRMS (ESI-TOF $^+$ ):  $m/z$  Calcd. for  $\text{C}_{26}\text{H}_{28}\text{N}_3\text{O}_3\text{S}$  [(M+H) $^+$ ]: 462.1851. Found: 462.1853. Chiral HPLC (Daicel Chiralpak AD-H, 19% IPA/hexanes, 0.6 mL/min,  $\lambda = 254$  nm)  $t_{\text{R}}$ (major) = 84.636 min,  $t_{\text{R}}$ (minor) = 52.818 min;  $[\alpha]_{\text{D}}^{25} = -52.3^\circ$  ( $c = 0.28$ ,  $\text{CH}_2\text{Cl}_2$ )

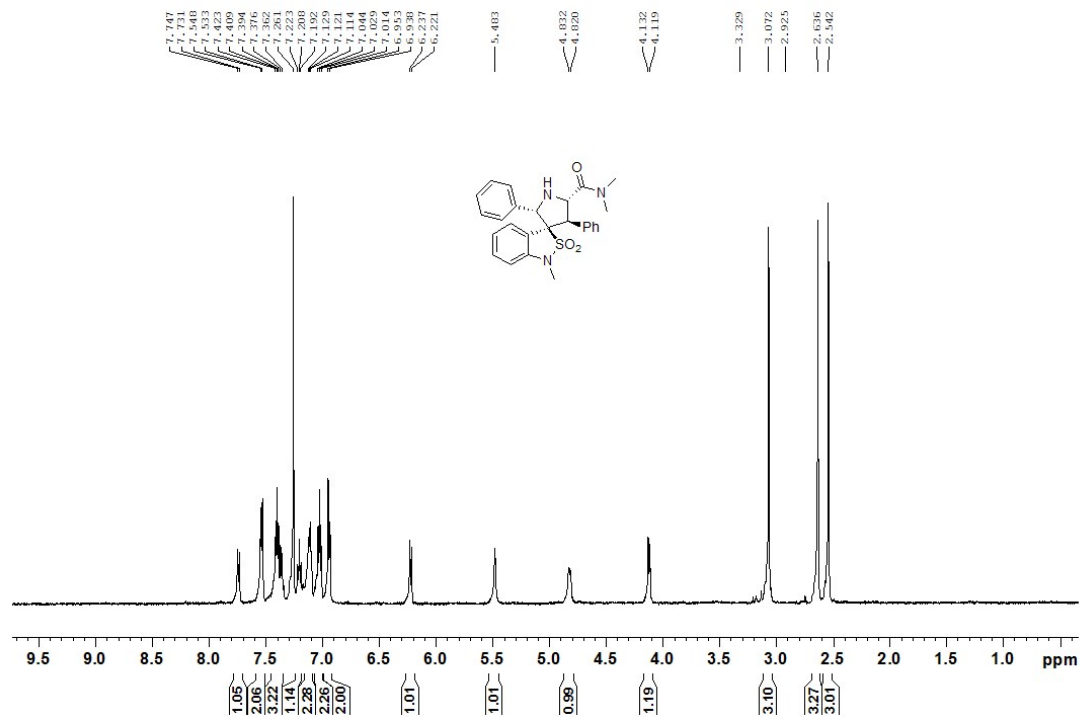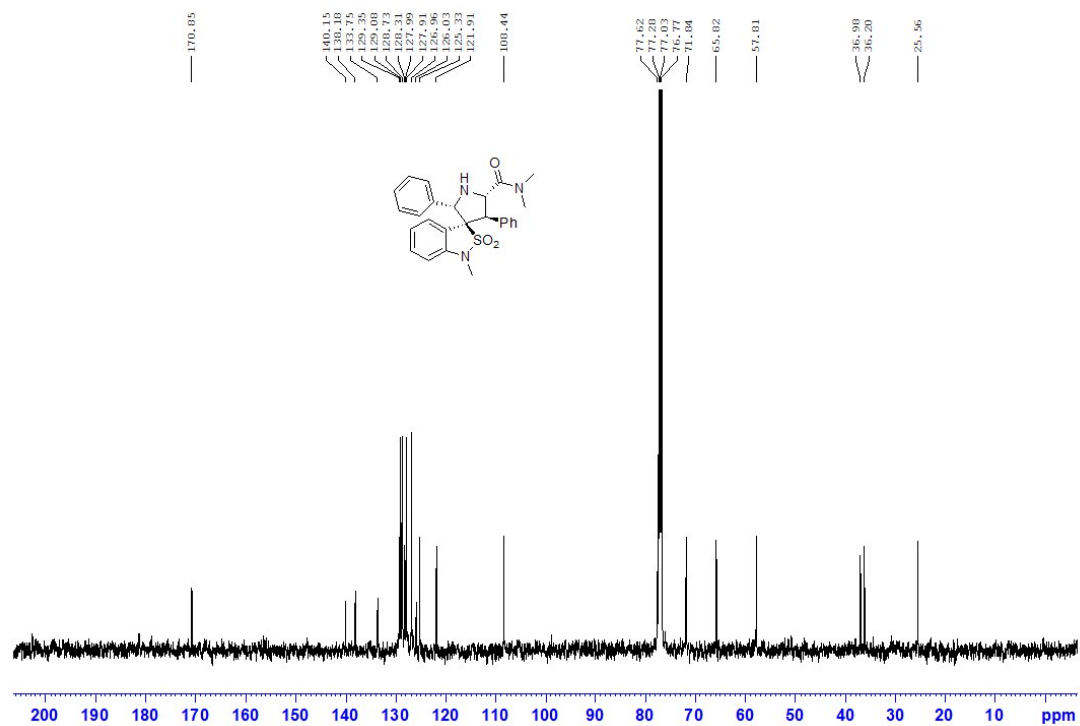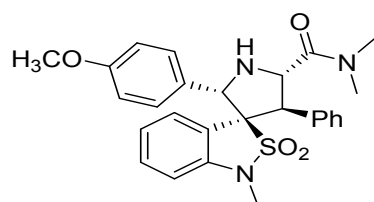

(2'S,3S,4'R,5'S)-2'-(4-methoxyphenyl)-N,N,1-trimethyl-4'-phenyl-1H-spiro[benzo[c]isothiazole-

3,3'-pyrrolidine]-5'-carboxamide 2,2-dioxide(5bb)

$^1\text{H}$  NMR (500 MHz,  $\text{CDCl}_3$ ):  $\delta$  7.76 (d, 1H,  $J = 7.6$  Hz), 7.53 (d, 2H,  $J = 7.3$  Hz), 7.42-7.35 (m, 3H), 7.21 (t, 1H,  $J = 7.6$  Hz), 7.11 (t, 1H,  $J = 7.6$  Hz), 6.84 (d, 2H,  $J = 8.5$  Hz), 6.55 (d, 2H,  $J = 8.4$  Hz), 6.27 (d, 1H,  $J = 7.9$  Hz), 5.42 (s, 1H), 4.78 (d, 1H, 5.5 Hz), 4.10 (d, 1H,  $J = 7.0$  Hz), 3.70 (s, 3H), 3.06 (s, 3H), 2.62 (s, 3H), 2.57 (s, 3H).  $^{13}\text{C}$  NMR (125 MHz,  $\text{CDCl}_3$ ):  $\delta$  170.9, 159.2, 140.2, 138.3, 129.3, 129.1, 129.0, 128.7, 128.3, 126.1, 125.8, 125.2, 121.9, 112.4, 108.6, 77.4, 71.5, 65.8, 57.8, 55.1, 37.0, 36.2, 25.7. HRMS (ESI-TOF $^+$ ):  $m/z$  Calcd. for  $\text{C}_{27}\text{H}_{29}\text{N}_3\text{O}_4\text{S}$  [(M+H) $^+$ ]: 492.1957. Found: 492.1953. Chiral HPLC (Daicel Chiralpak AD-H, 19% IPA/hexanes, 0.6 mL/min,  $\lambda = 254$  nm)  $t_{\text{R}}$ (major) = 103.481 min,  $t_{\text{R}}$ (minor) = 60.855 min;  $[\alpha]_{\text{D}}^{25} = -48.7^\circ$  ( $c = 0.31$ ,  $\text{CH}_2\text{Cl}_2$ )

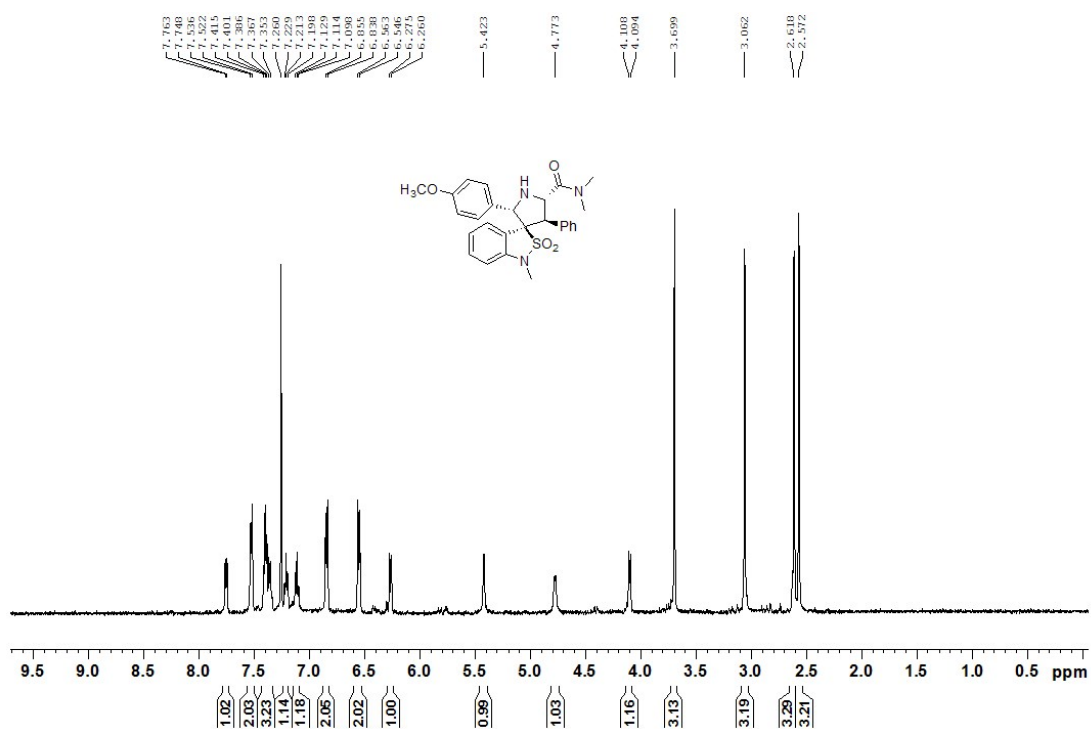

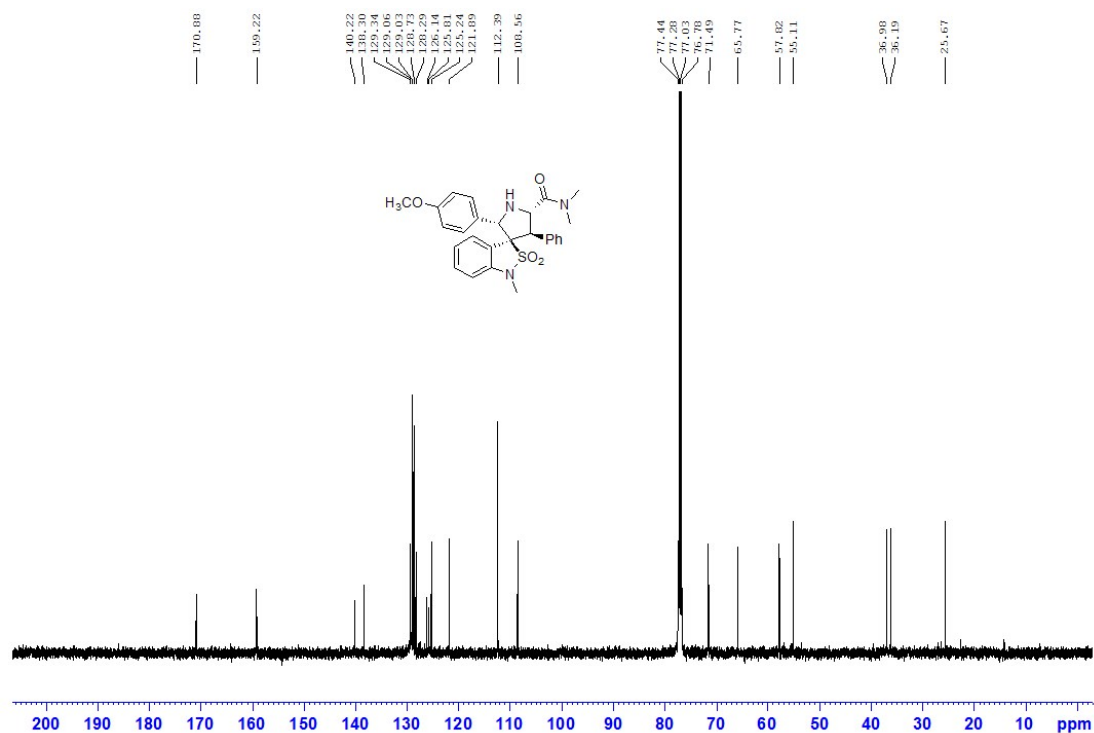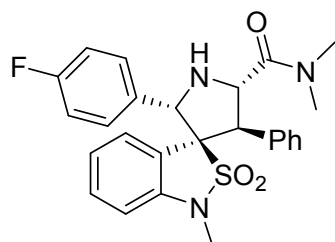

(2'S,3S,4'R,5'S)-2'-(4-fluorophenyl)-N,N,1-trimethyl-4'-phenyl-1H-spiro[benzo[c]isothiazole-3,3'-pyrrolidine]-5'-carboxamide 2,2-dioxide(5bc)

$^1\text{H}$  NMR (500 MHz,  $\text{CDCl}_3$ ):  $\delta$  7.80 (d, 1H,  $J = 7.5$  Hz), 7.51-7.49 (m, 2H), 7.40-7.34 (m, 3H), 7.20 (t, 1H,  $J = 7.4$  Hz), 7.11 (t, 1H,  $J = 7.5$  Hz), 6.93-6.91 (m, 2H), 6.70 (t, 2H,  $J = 8.5$  Hz), 6.25 (d, 1H,  $J = 7.8$  Hz), 5.36 (s, 1H), 4.68 (d, 1H,  $J = 7.1$  Hz), 4.08 (d, 1H,  $J = 7.1$  Hz), 3.24 (s, 3H), 2.59 (s, 3H), 2.58 (s, 3H).  $^{13}\text{C}$  NMR (125 MHz,  $\text{CDCl}_3$ ):  $\delta$  170.9, 140.1, 138.2, 133.8, 129.3, 129.1, 128.7, 128.3, 128.0, 127.9, 127.7, 126.9, 126.0, 125.3, 121.9, 108.4, 77.6, 71.9, 65.9, 57.8, 37.0, 36.2, 25.6. HRMS (ESI-TOF $^+$ ):  $m/z$  Calcd. for  $\text{C}_{26}\text{H}_{26}\text{N}_3\text{O}_3\text{S}$  [(M+H) $^+$ ]: 480.1757. Found: 480.1756. Chiral HPLC (Daicel Chiralpak AD-H, 11% IPA/hexanes, 0.7 mL/min,  $\lambda = 254$  nm)  $t_{\text{R}}$ (major) = 105.849 min,  $t_{\text{R}}$ (minor) = 79.699 min;  $[\alpha]_{\text{D}}^{25} = -62.1^\circ$  (c = 0.26,  $\text{CH}_2\text{Cl}_2$ )

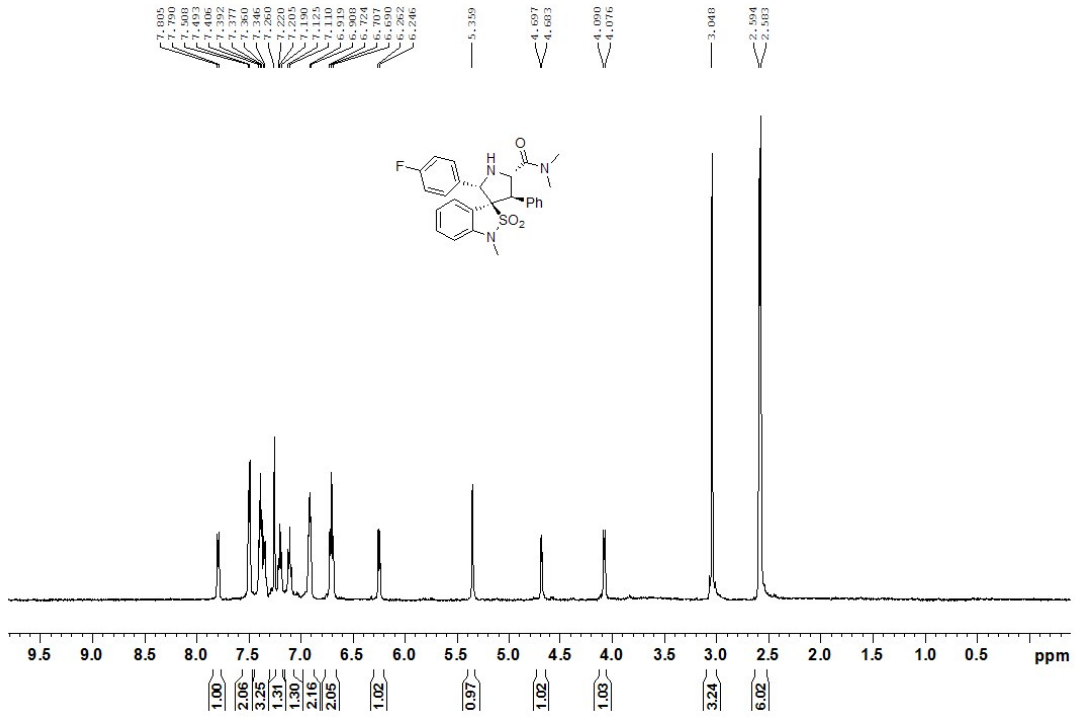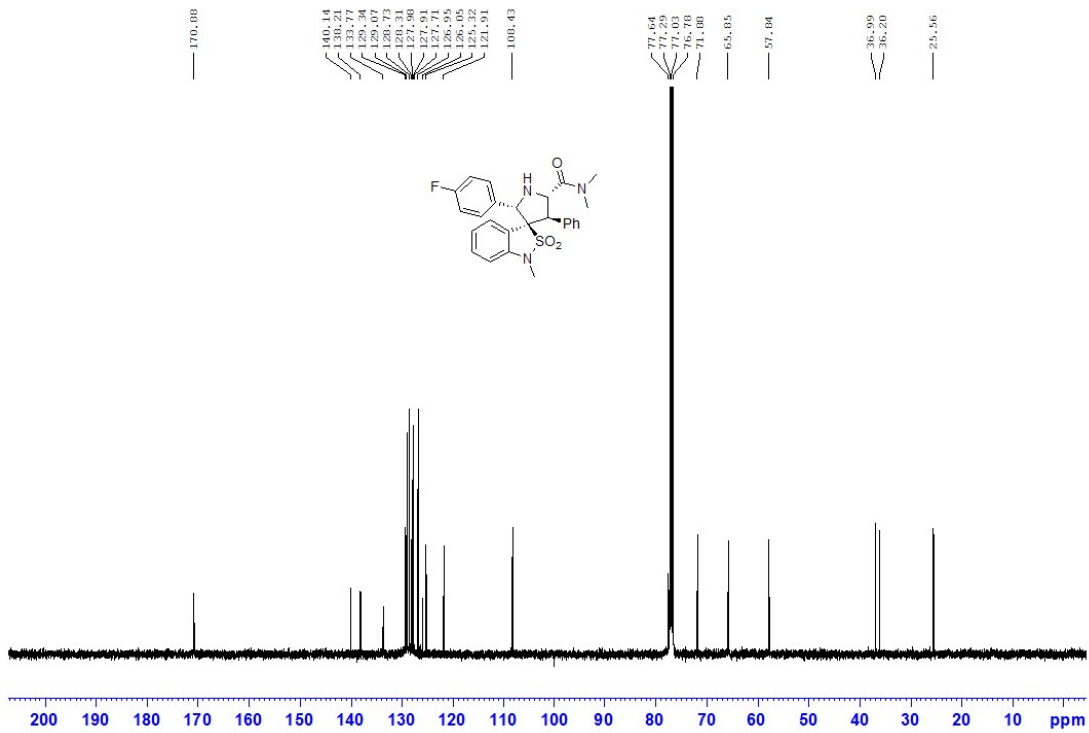



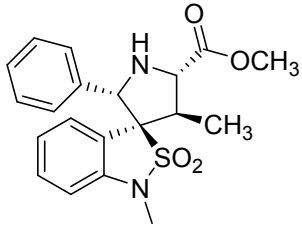

HPLC Conditions: Daicel Chiralpak AD-H, 30% IPA/hexanes, 1 mL/min

D:\液相数据\数据文件\2017\桥鲁振\2017-7-11-3.lcd

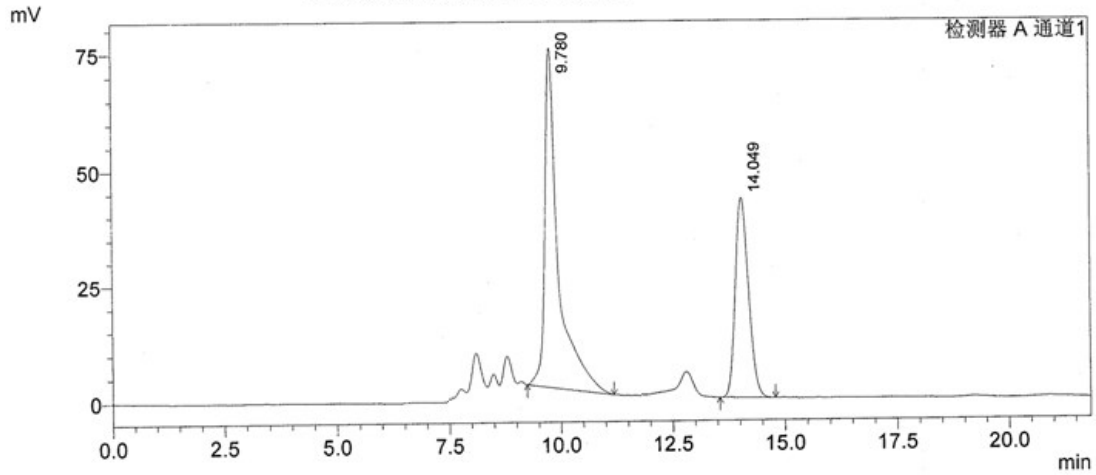

1 检测器 A 通道1/254nm

峰表

| 检测器 A Ch1 254nm |        |         |        |         |         |
|-----------------|--------|---------|--------|---------|---------|
| 峰#              | 保留时间   | 面积      | 高度     | 面积 %    | 高度 %    |
| 1               | 9.780  | 1538811 | 73352  | 63.438  | 62.801  |
| 2               | 14.049 | 886867  | 43449  | 36.562  | 37.199  |
| 总计              |        | 2425678 | 116802 | 100.000 | 100.000 |

D:\液相数据\数据文件\2017\桥鲁振\2017-7-11-4.lcd

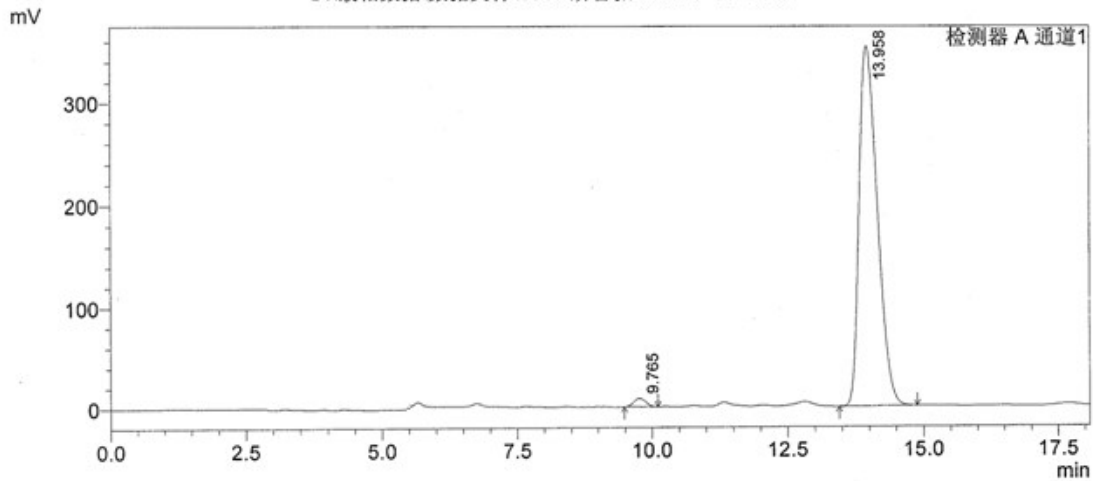

1 检测器 A 通道1/254nm

峰表

| 检测器 A Ch1 254nm |        |         |        |         |         |
|-----------------|--------|---------|--------|---------|---------|
| 峰#              | 保留时间   | 面积      | 高度     | 面积 %    | 高度 %    |
| 1               | 9.765  | 129557  | 8534   | 1.533   | 2.348   |
| 2               | 13.958 | 8324066 | 354962 | 98.467  | 97.652  |
| 总计              |        | 8453623 | 363496 | 100.000 | 100.000 |

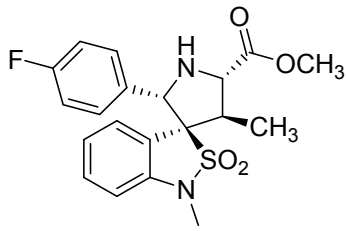

HPLC Conditions: Daicel Chiralpak AD-H, 30% IPA/hexanes, 1 mL/min

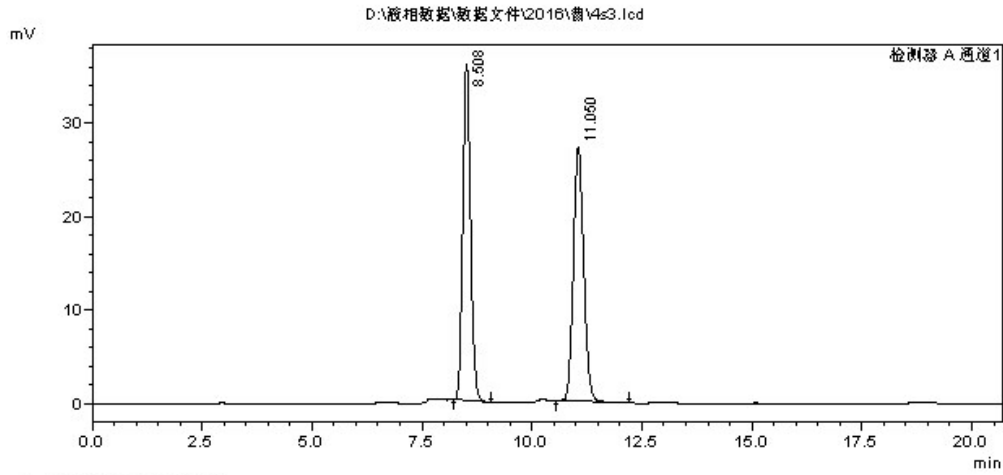

峰表

| 峰# | 保留时间   | 面积     | 高度    | 面积 %    | 高度 %    |
|----|--------|--------|-------|---------|---------|
| 1  | 8.508  | 441415 | 35925 | 49.855  | 56.974  |
| 2  | 11.050 | 443980 | 27130 | 50.145  | 43.026  |
| 总计 |        | 885395 | 63055 | 100.000 | 100.000 |

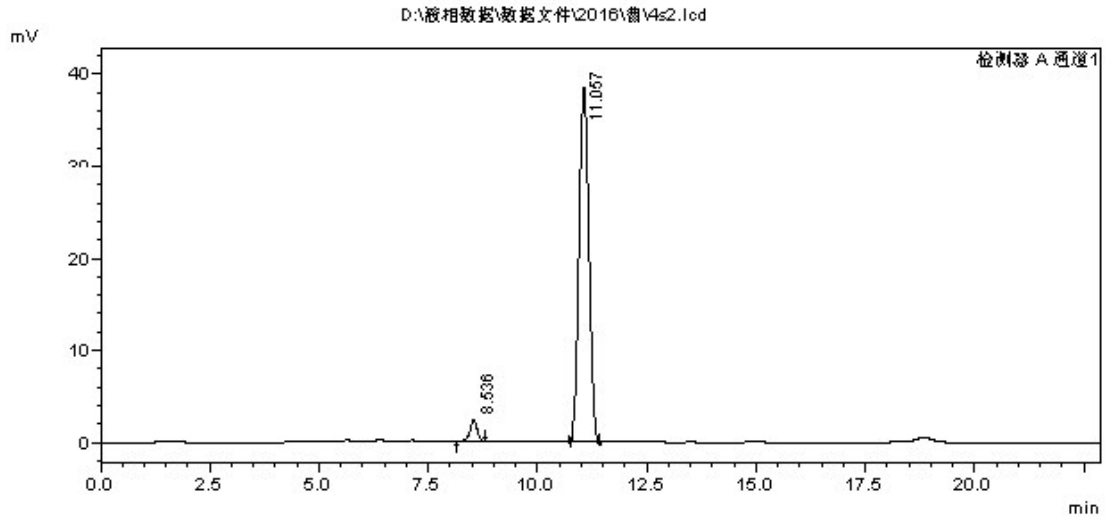

峰表

| 峰# | 保留时间   | 面积     | 高度    | 面积 %    | 高度 %    |
|----|--------|--------|-------|---------|---------|
| 1  | 8.536  | 25918  | 2276  | 4.366   | 5.737   |
| 2  | 11.057 | 567742 | 37397 | 95.634  | 94.263  |
| 总计 |        | 593660 | 39674 | 100.000 | 100.000 |

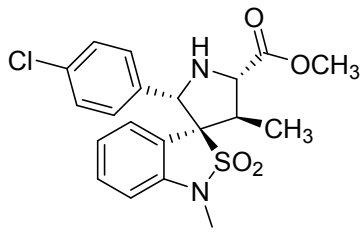

HPLC Conditions: Daicel Chiralpak AD-H, 30% IPA/hexanes, 1 mL/min

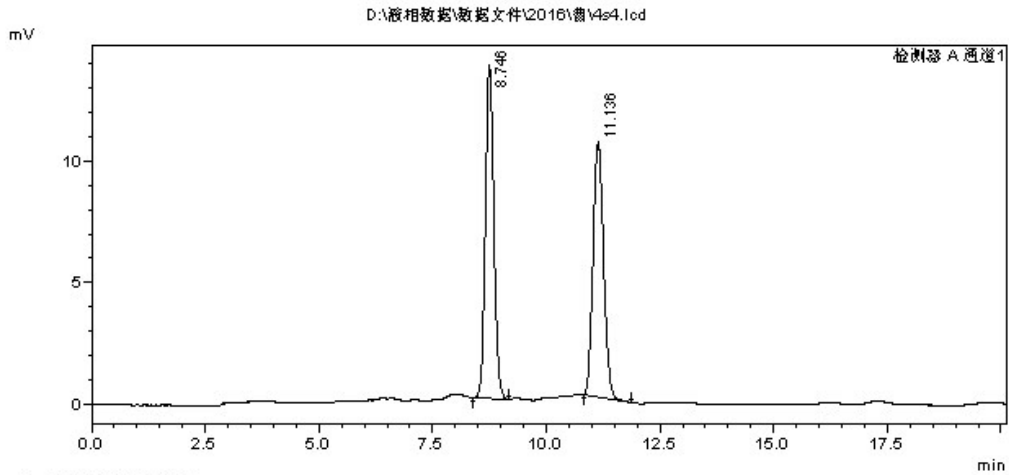

峰表

| 检测器 A Ch1 254nm |        |        |       |         |         |
|-----------------|--------|--------|-------|---------|---------|
| 峰#              | 保留时间   | 面积     | 高度    | 面积 %    | 高度 %    |
| 1               | 8.746  | 175134 | 13641 | 50.854  | 56.690  |
| 2               | 11.136 | 169253 | 10421 | 49.146  | 43.310  |
| 总计              |        | 344387 | 24062 | 100.000 | 100.000 |

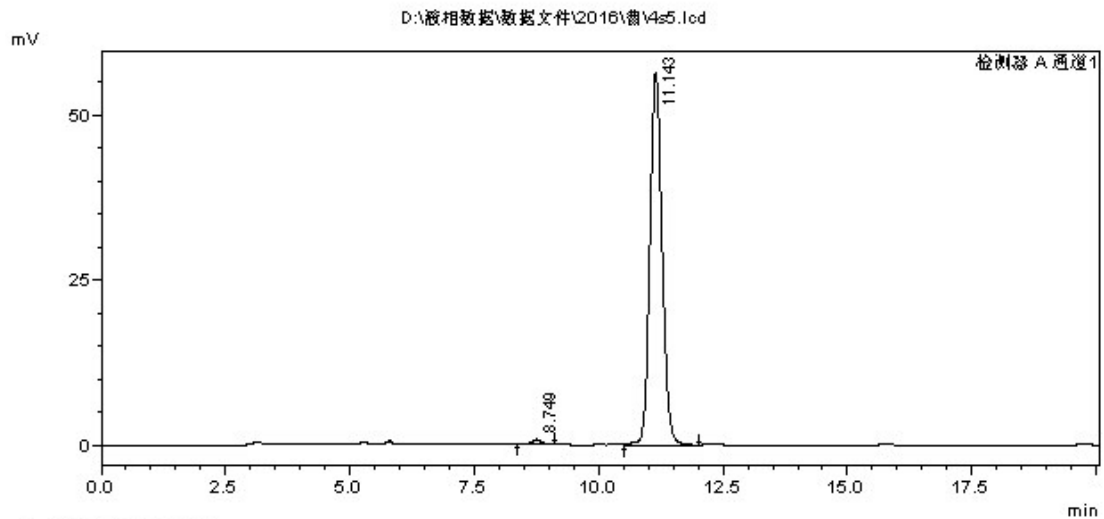

峰表

| 检测器 A Ch1 254nm |        |        |       |         |         |
|-----------------|--------|--------|-------|---------|---------|
| 峰#              | 保留时间   | 面积     | 高度    | 面积 %    | 高度 %    |
| 1               | 8.749  | 12379  | 812   | 1.273   | 1.418   |
| 2               | 11.143 | 960183 | 56418 | 98.727  | 98.582  |
| 总计              |        | 972561 | 57229 | 100.000 | 100.000 |

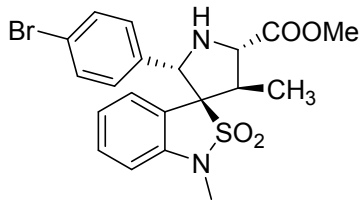

HPLC Conditions: Daicel Chiralpak AD-H, 30% IPA/hexanes, 1 mL/min

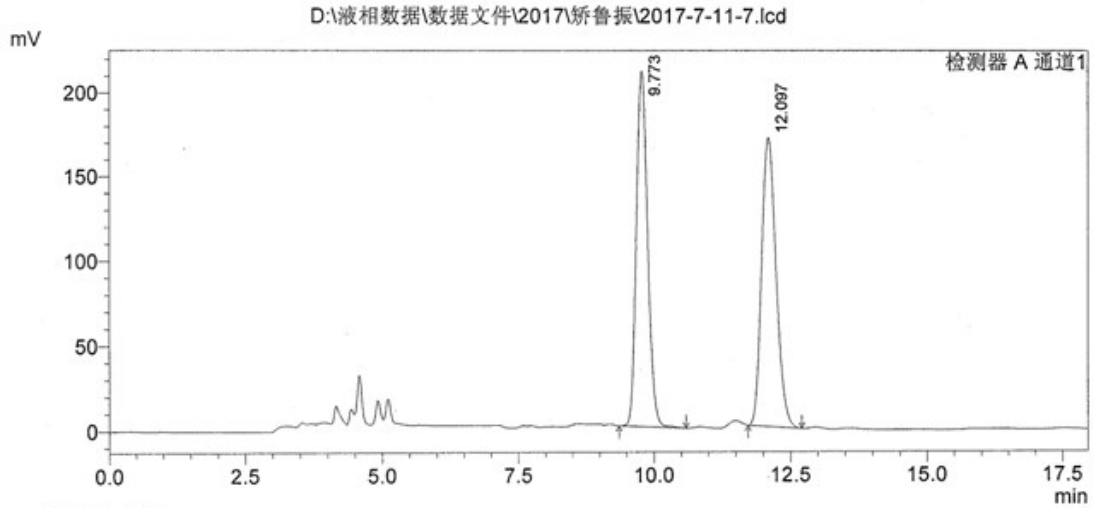

峰表

| 峰# | 保留时间   | 面积      | 高度     | 面积 %    | 高度 %    |
|----|--------|---------|--------|---------|---------|
| 1  | 9.773  | 3037592 | 211163 | 49.250  | 55.239  |
| 2  | 12.097 | 3130084 | 171109 | 50.750  | 44.761  |
| 总计 |        | 6167676 | 382272 | 100.000 | 100.000 |

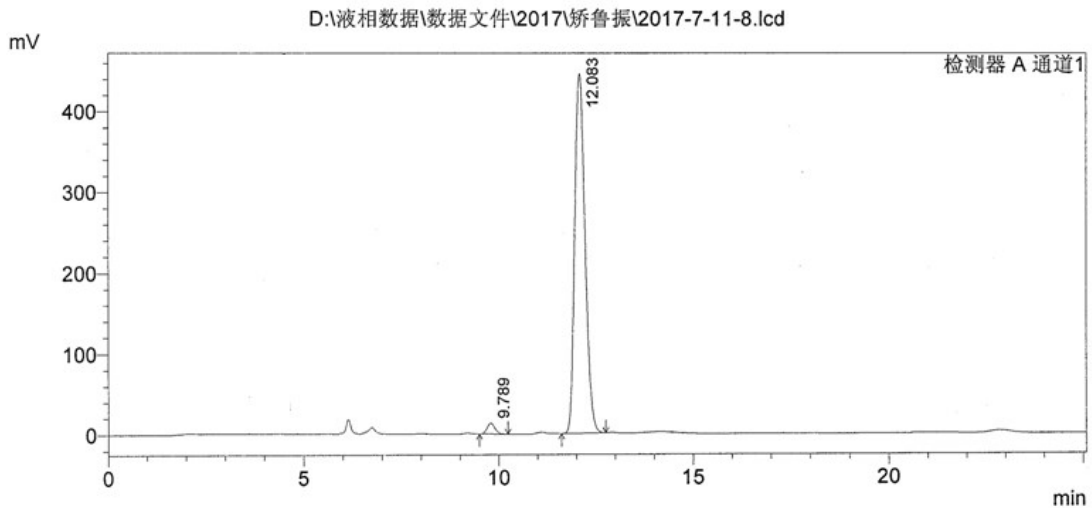

峰表

| 峰# | 保留时间   | 面积      | 高度     | 面积 %    | 高度 %    |
|----|--------|---------|--------|---------|---------|
| 1  | 9.789  | 189577  | 13662  | 2.244   | 2.968   |
| 2  | 12.083 | 8258808 | 446576 | 97.756  | 97.032  |
| 总计 |        | 8448385 | 460238 | 100.000 | 100.000 |

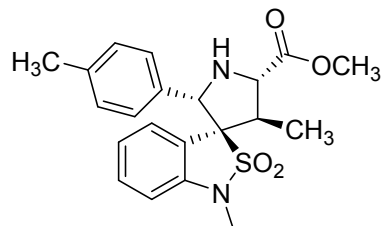

HPLC Conditions: Daicel Chiralpak AD-H, 30% IPA/hexanes, 1 mL/min

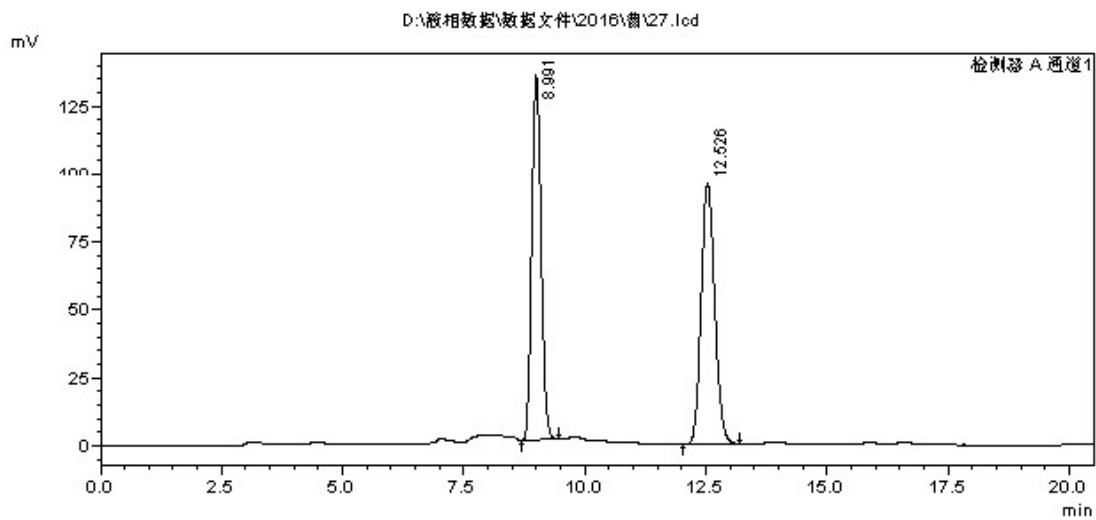

峰表

| 峰# | 保留时间   | 面积      | 高度     | 面积 %    | 高度 %    |
|----|--------|---------|--------|---------|---------|
| 1  | 8.991  | 1789630 | 134340 | 48.928  | 58.284  |
| 2  | 12.526 | 1868087 | 96151  | 51.072  | 41.716  |
| 总计 |        | 3657717 | 230491 | 100.000 | 100.000 |

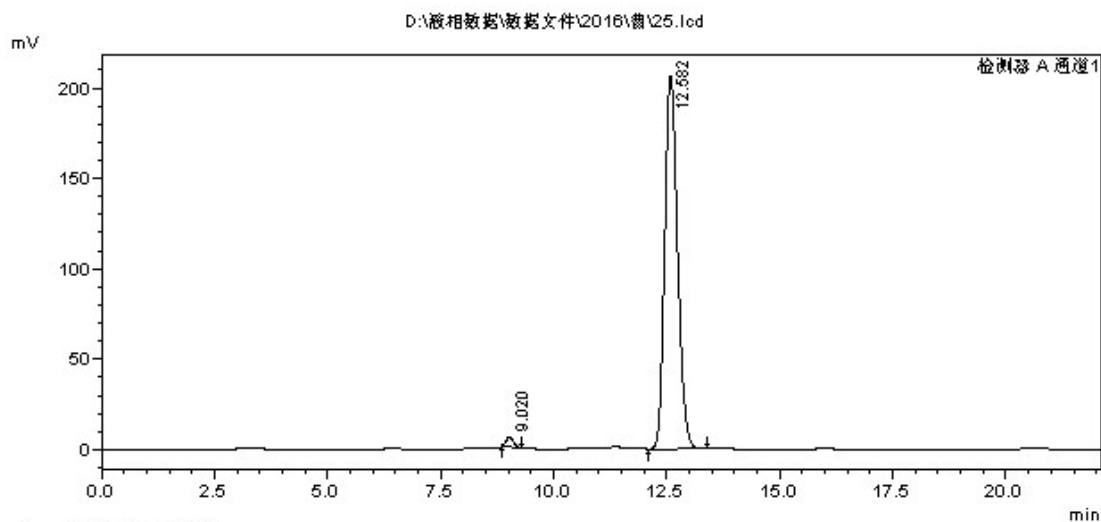

峰表

| 峰# | 保留时间   | 面积      | 高度     | 面积 %    | 高度 %    |
|----|--------|---------|--------|---------|---------|
| 1  | 9.020  | 56991   | 5217   | 1.376   | 2.469   |
| 2  | 12.582 | 4086127 | 206070 | 98.624  | 97.531  |
| 总计 |        | 4143118 | 211286 | 100.000 | 100.000 |

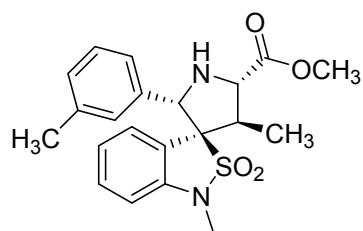

HPLC Conditions: Daicel Chiralpak AD-H, 10% IPA/hexanes, 1 mL/min

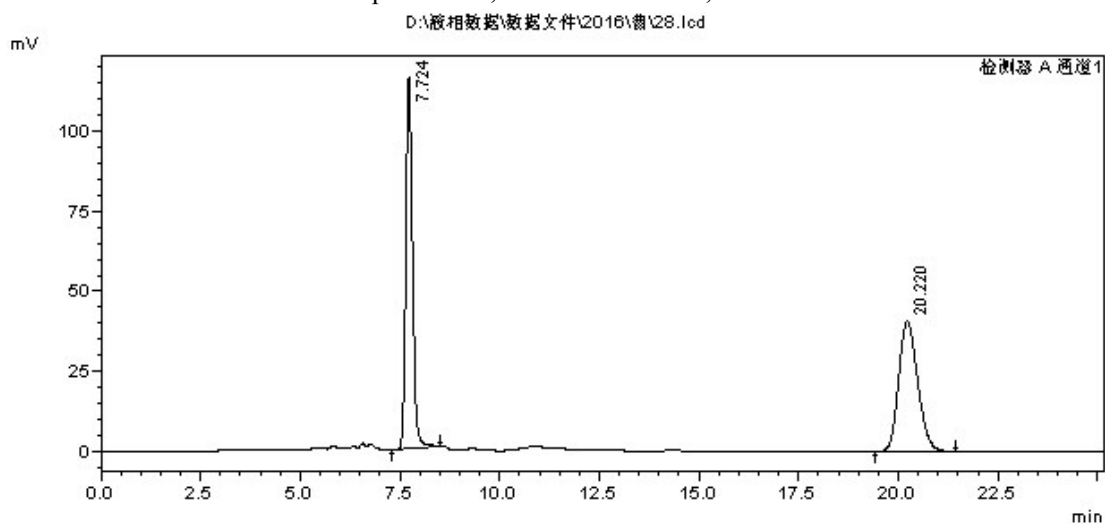

峰表

检测器 A Ch1 254nm

| 峰# | 保留时间   | 面积      | 高度     | 面积 %    | 高度 %    |
|----|--------|---------|--------|---------|---------|
| 1  | 7.724  | 1362392 | 116118 | 50.398  | 74.045  |
| 2  | 20.220 | 1340874 | 40704  | 49.602  | 25.955  |
| 总计 |        | 2703265 | 156822 | 100.000 | 100.000 |

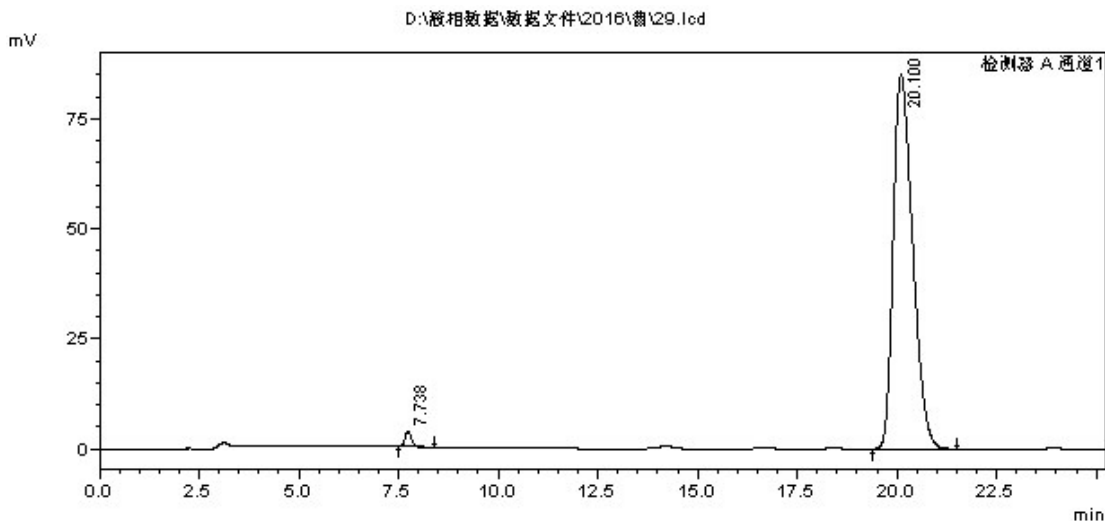

峰表

检测器 A Ch1 254nm

| 峰# | 保留时间   | 面积      | 高度    | 面积 %    | 高度 %    |
|----|--------|---------|-------|---------|---------|
| 1  | 7.738  | 42346   | 3437  | 1.445   | 3.883   |
| 2  | 20.100 | 2889055 | 85092 | 98.555  | 96.117  |
| 总计 |        | 2931402 | 88529 | 100.000 | 100.000 |

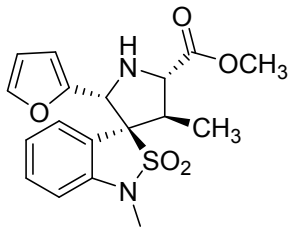

HPLC Conditions: Daicel Chiralpak AD-H, 20% IPA/hexanes, 0.8 mL/min

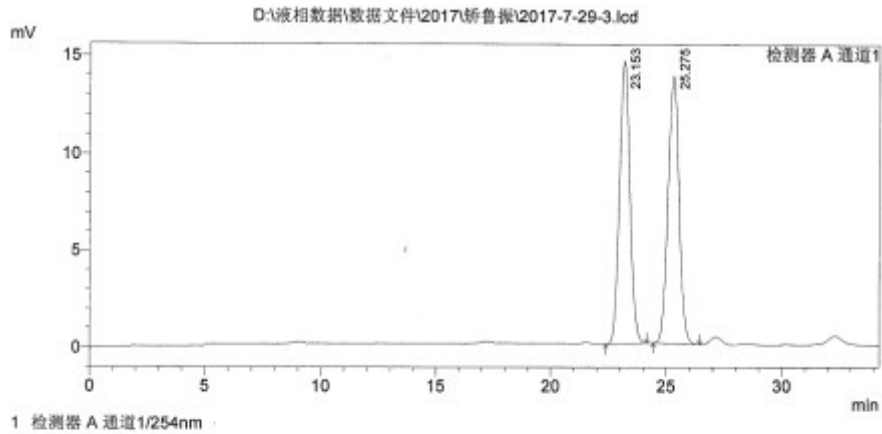

峰表

| 峰# | 保留时间   | 面积     | 高度    | 面积 %    | 高度 %    |
|----|--------|--------|-------|---------|---------|
| 1  | 23.153 | 457227 | 14576 | 49.973  | 51.343  |
| 2  | 25.275 | 457715 | 13813 | 50.027  | 48.657  |
| 总计 |        | 914942 | 28389 | 100.000 | 100.000 |

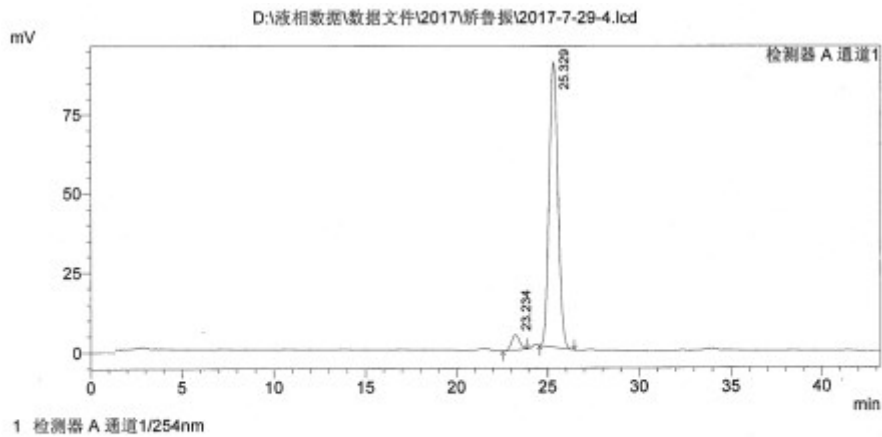

峰表

| 峰# | 保留时间   | 面积      | 高度    | 面积 %    | 高度 %    |
|----|--------|---------|-------|---------|---------|
| 1  | 23.234 | 141986  | 4730  | 4.478   | 4.986   |
| 2  | 25.329 | 3028907 | 90131 | 95.522  | 95.014  |
| 总计 |        | 3170793 | 94861 | 100.000 | 100.000 |

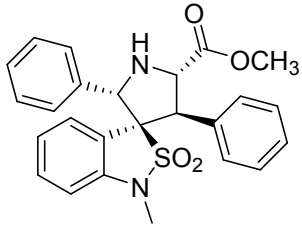

HPLC Conditions: Daicel Chiralpak AD-H, 20% IPA/hexanes, 0.8 mL/min

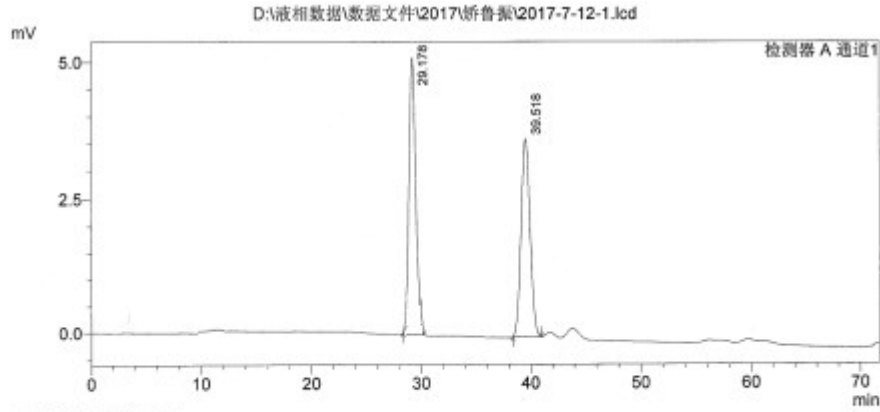

峰表

| 峰# | 保留时间   | 面积     | 高度   | 面积 %    | 高度 %    |
|----|--------|--------|------|---------|---------|
| 1  | 29.178 | 191182 | 4778 | 48.623  | 56.511  |
| 2  | 39.518 | 210269 | 3677 | 51.377  | 43.489  |
| 总计 |        | 401452 | 8455 | 100.000 | 100.000 |

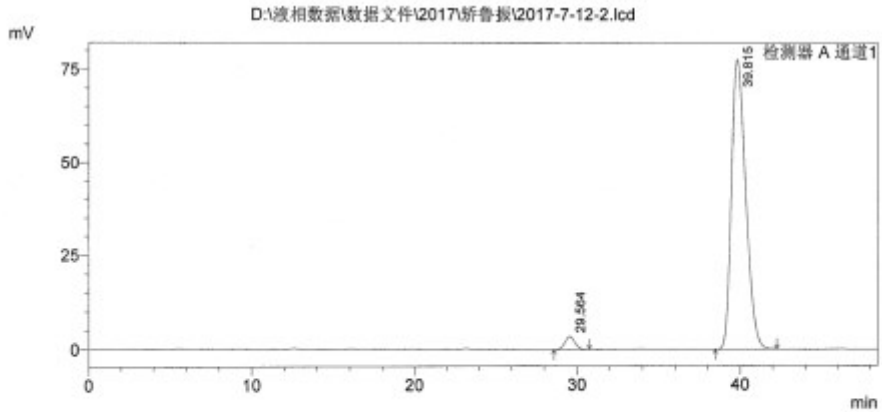

峰表

| 峰# | 保留时间   | 面积      | 高度    | 面积 %    | 高度 %    |
|----|--------|---------|-------|---------|---------|
| 1  | 29.564 | 143344  | 3393  | 2.939   | 4.176   |
| 2  | 39.815 | 4733645 | 77856 | 97.061  | 95.824  |
| 总计 |        | 4876988 | 81249 | 100.000 | 100.000 |



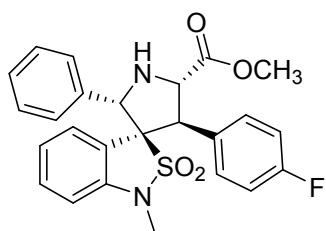

HPLC Conditions: Daicel Chiralpak AD-H, 30% IPA/hexanes, 0.9 mL/min

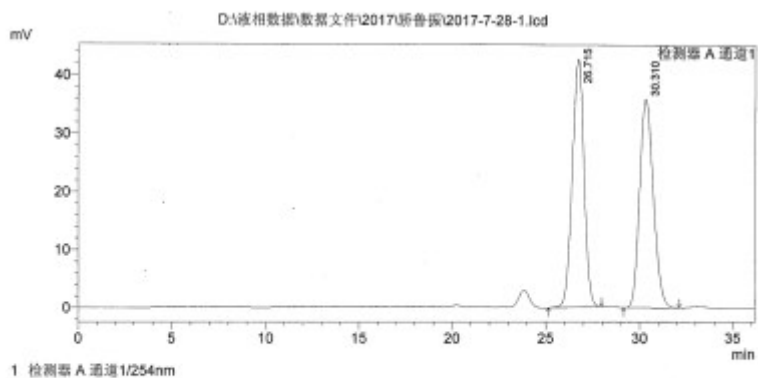

峰表

| 峰# | 保留时间   | 面积      | 高度    | 面积 %    | 高度 %    |
|----|--------|---------|-------|---------|---------|
| 1  | 26.715 | 1862720 | 42791 | 50.154  | 54.275  |
| 2  | 30.310 | 1851305 | 36049 | 49.846  | 45.725  |
| 总计 |        | 3714024 | 78840 | 100.000 | 100.000 |

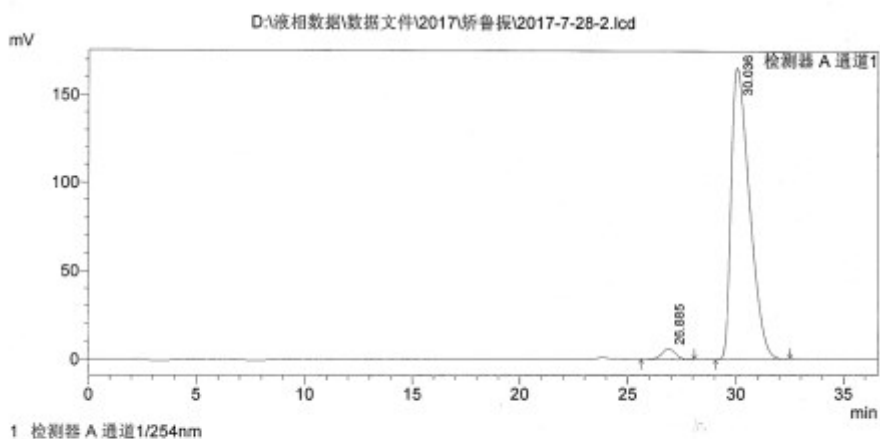

峰表

| 峰# | 保留时间   | 面积       | 高度     | 面积 %    | 高度 %    |
|----|--------|----------|--------|---------|---------|
| 1  | 26.885 | 257336   | 5942   | 2.554   | 3.452   |
| 2  | 30.036 | 9817924  | 166209 | 97.446  | 96.548  |
| 总计 |        | 10075260 | 172152 | 100.000 | 100.000 |

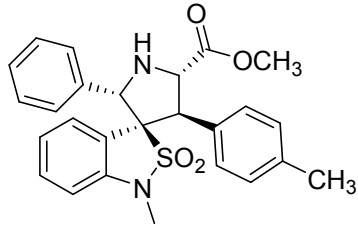

HPLC Conditions: Daicel Chiralpak AD-H, 20% IPA/hexanes, 0.8 mL/min

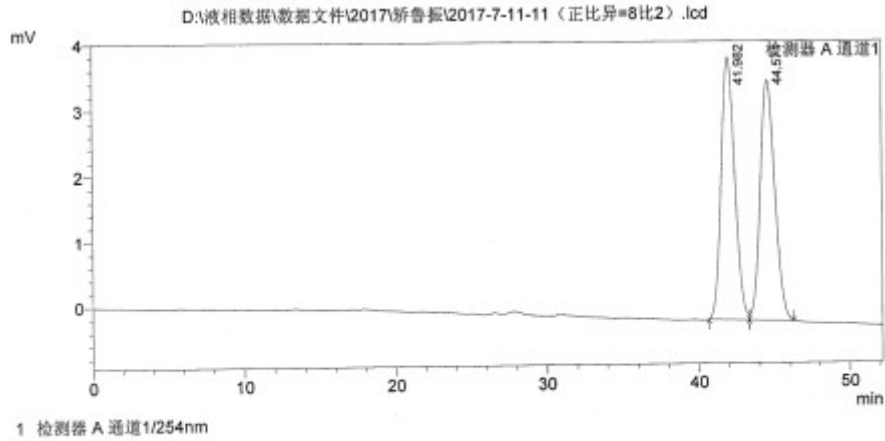

峰表

| 峰# | 保留时间   | 面积     | 高度   | 面积 %    | 高度 %    |
|----|--------|--------|------|---------|---------|
| 1  | 41.982 | 249793 | 4028 | 50.216  | 52.145  |
| 2  | 44.571 | 247647 | 3696 | 49.784  | 47.855  |
| 总计 |        | 497441 | 7724 | 100.000 | 100.000 |

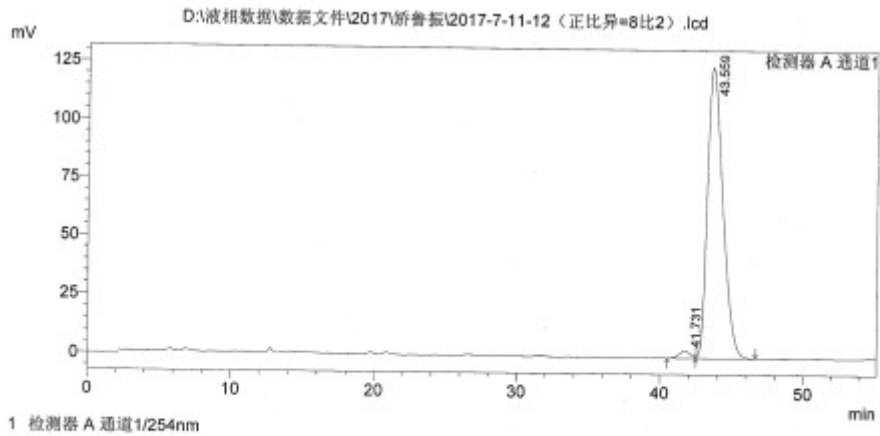

峰表

| 峰# | 保留时间   | 面积      | 高度     | 面积 %    | 高度 %    |
|----|--------|---------|--------|---------|---------|
| 1  | 41.731 | 169293  | 3008   | 1.788   | 2.348   |
| 2  | 43.559 | 9297057 | 125071 | 98.212  | 97.652  |
| 总计 |        | 9466349 | 128078 | 100.000 | 100.000 |

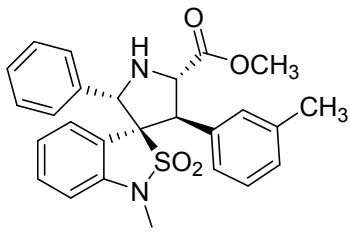

HPLC Conditions: Daicel Chiralpak AD-H, 30% IPA/hexanes, 0.9 mL/min

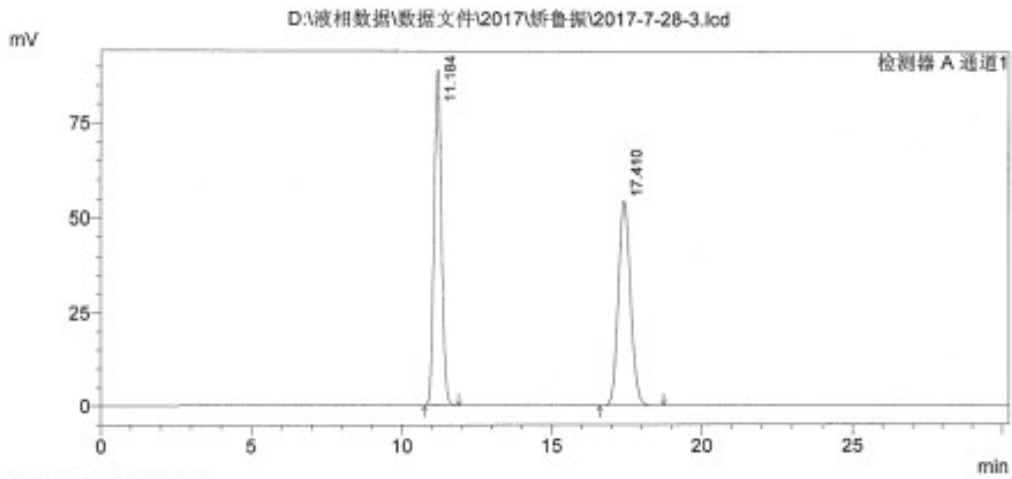

峰表

| 峰# | 保留时间   | 面积      | 高度     | 面积 %    | 高度 %    |
|----|--------|---------|--------|---------|---------|
| 1  | 11.184 | 1545634 | 89237  | 49.911  | 62.051  |
| 2  | 17.410 | 1551163 | 54575  | 50.089  | 37.949  |
| 总计 |        | 3096797 | 143812 | 100.000 | 100.000 |

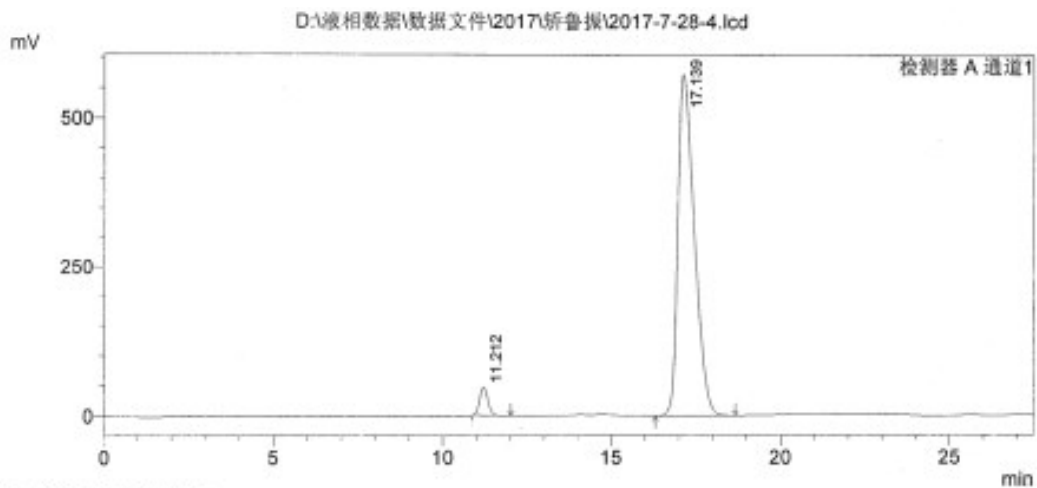

峰表

| 峰# | 保留时间   | 面积       | 高度     | 面积 %    | 高度 %    |
|----|--------|----------|--------|---------|---------|
| 1  | 11.212 | 798358   | 46785  | 3.944   | 7.546   |
| 2  | 17.139 | 19441888 | 573218 | 96.056  | 92.454  |
| 总计 |        | 20240246 | 620003 | 100.000 | 100.000 |

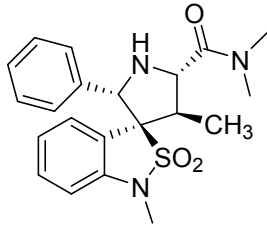

HPLC Conditions: Daicel Chiralpak AD-H, 25% IPA/hexanes, 0.8 mL/min  
 The experimental results of Ag-catalysis

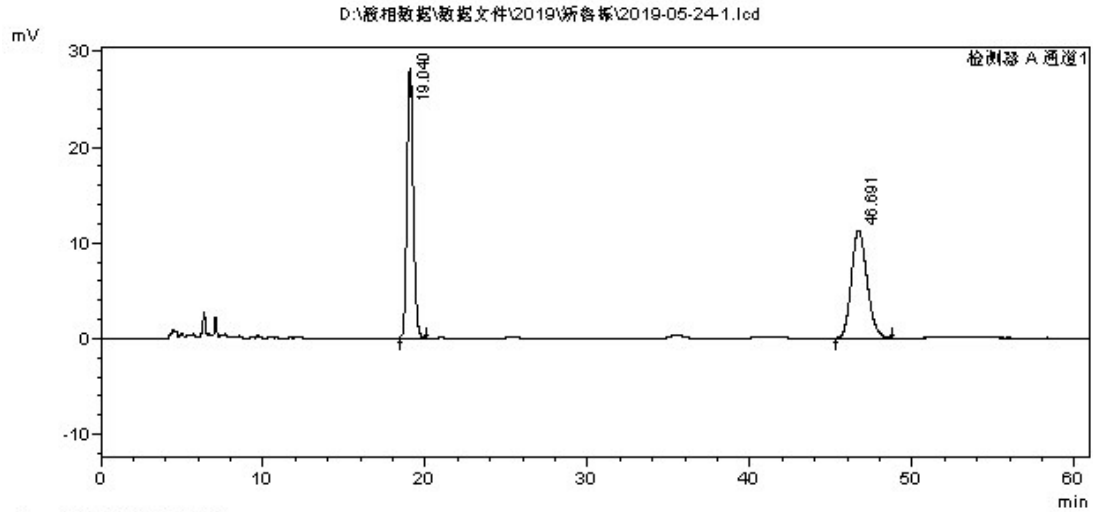

峰表

| 峰# | 保留时间   | 面积      | 高度    | 面积 %    | 高度 %    |
|----|--------|---------|-------|---------|---------|
| 1  | 19.040 | 751730  | 28173 | 49.970  | 71.468  |
| 2  | 46.691 | 752633  | 11247 | 50.030  | 28.532  |
| 总计 |        | 1504363 | 39421 | 100.000 | 100.000 |

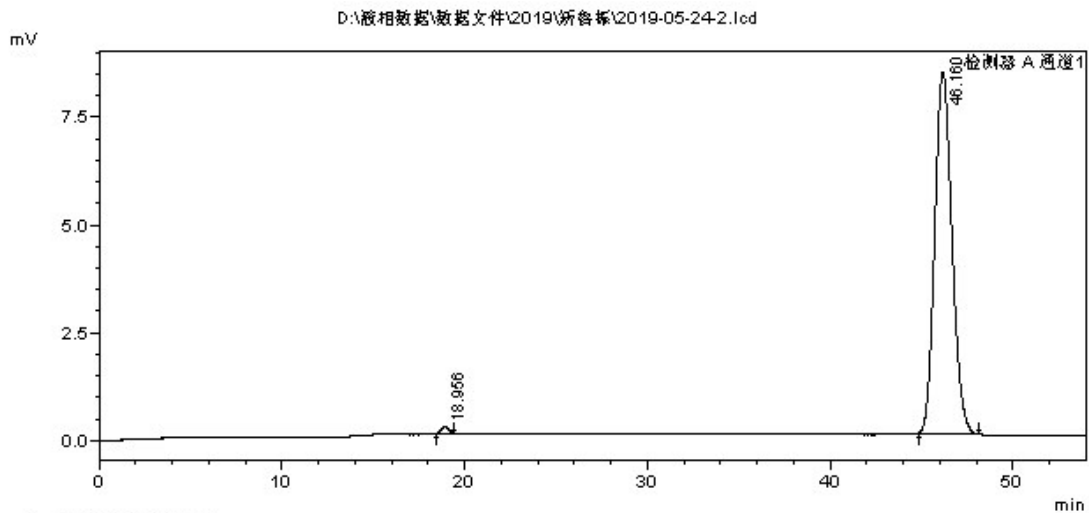

峰表

| 峰# | 保留时间   | 面积     | 高度   | 面积 %    | 高度 %    |
|----|--------|--------|------|---------|---------|
| 1  | 18.956 | 4344   | 160  | 0.785   | 1.879   |
| 2  | 46.160 | 548828 | 8380 | 99.215  | 98.121  |
| 总计 |        | 553172 | 8541 | 100.000 | 100.000 |

# The experimental results of Cu-catalysis

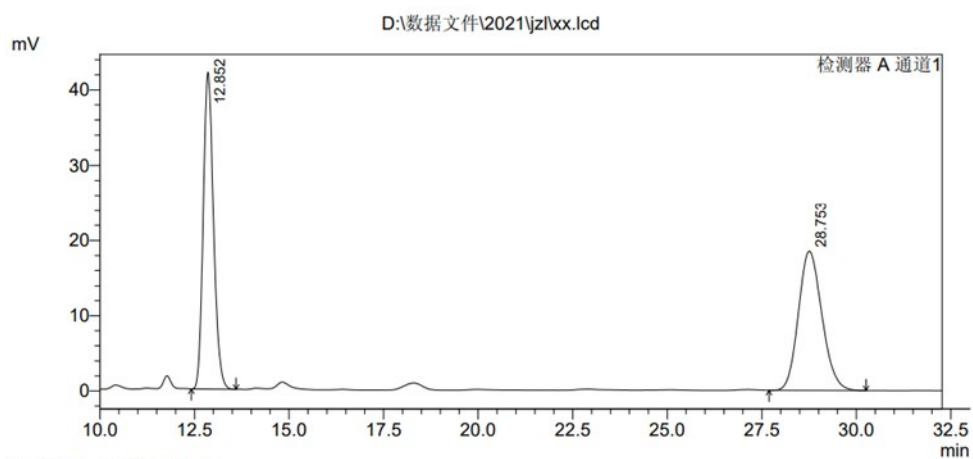

峰表

| 峰# | 保留时间   | 面积      | 高度    | 面积 %    | 高度 %    |
|----|--------|---------|-------|---------|---------|
| 1  | 12.852 | 797554  | 42096 | 49.902  | 69.462  |
| 2  | 28.753 | 800688  | 18507 | 50.098  | 30.538  |
| 总计 |        | 1598242 | 60603 | 100.000 | 100.000 |

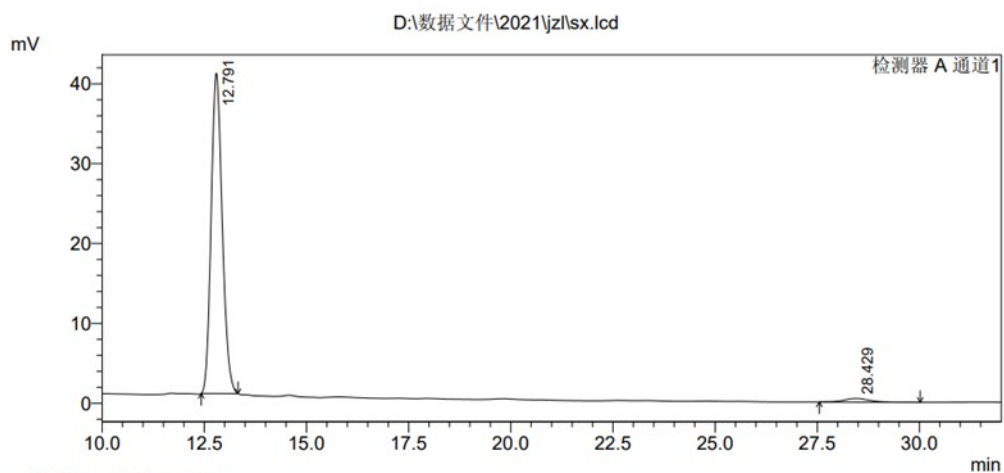

峰表

| 峰# | 保留时间   | 面积     | 高度    | 面积 %    | 高度 %    |
|----|--------|--------|-------|---------|---------|
| 1  | 12.791 | 755959 | 40097 | 97.608  | 98.901  |
| 2  | 28.429 | 18530  | 445   | 2.392   | 1.099   |
| 总计 |        | 774489 | 40543 | 100.000 | 100.000 |

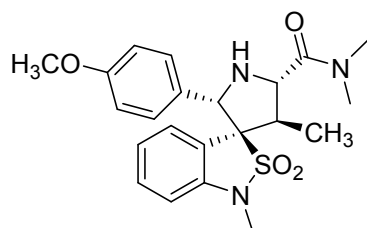

HPLC Conditions: Daicel Chiralpak AD-H, 25% IPA/hexanes, 0.8 mL/min

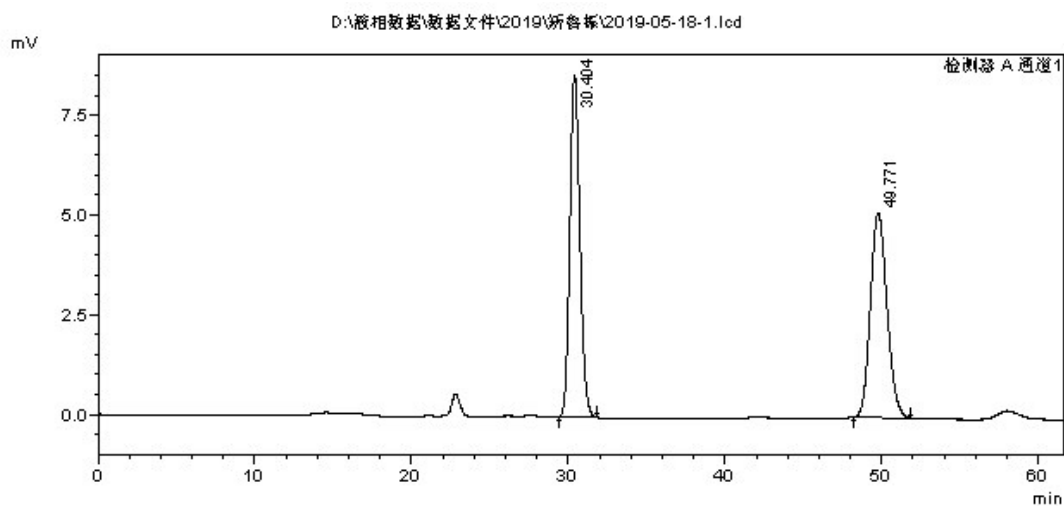

峰表

检测器 A Ch1 254nm

| 峰# | 保留时间   | 面积     | 高度    | 面积 %    | 高度 %    |
|----|--------|--------|-------|---------|---------|
| 1  | 30.404 | 381238 | 8561  | 50.211  | 62.481  |
| 2  | 49.771 | 378031 | 5141  | 49.789  | 37.519  |
| 总计 |        | 759269 | 13702 | 100.000 | 100.000 |

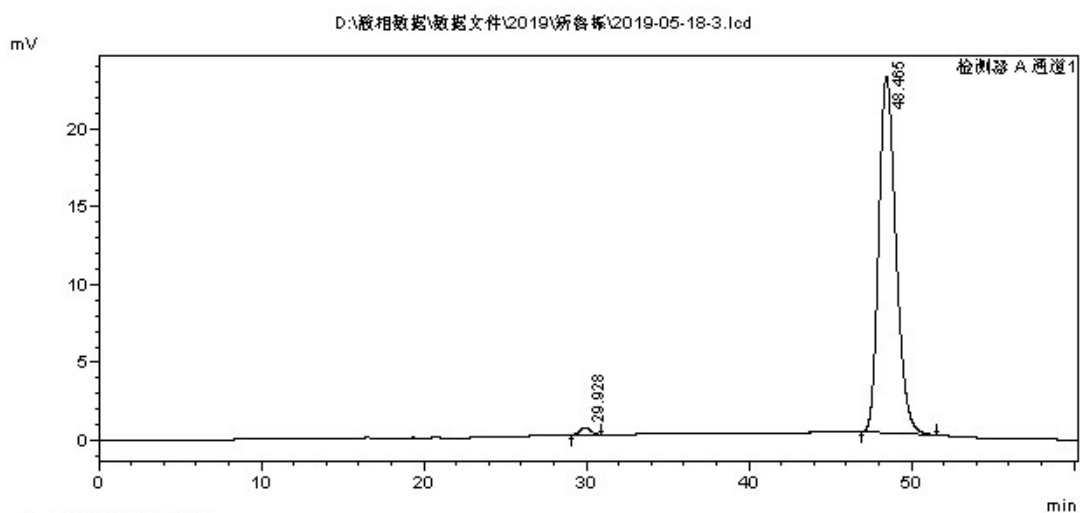

峰表

检测器 A Ch1 254nm

| 峰# | 保留时间   | 面积      | 高度    | 面积 %    | 高度 %    |
|----|--------|---------|-------|---------|---------|
| 1  | 29.928 | 21004   | 477   | 1.233   | 2.046   |
| 2  | 48.465 | 1682920 | 22833 | 98.767  | 97.954  |
| 总计 |        | 1703924 | 23309 | 100.000 | 100.000 |

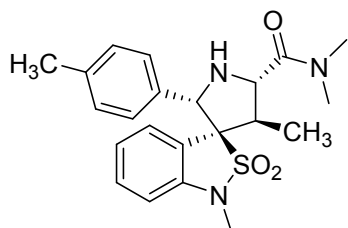

HPLC Conditions: Daicel Chiralpak AD-H, 25% IPA/hexanes, 0.8 mL/min

D:\液相数据\数据文件\2019\新任务\2019-05-24-5.lod

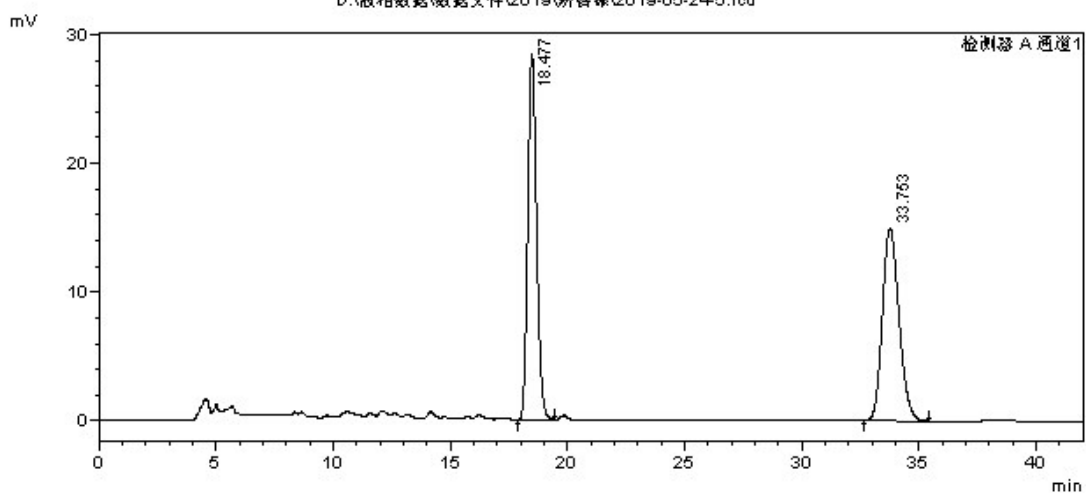

1 检测器 A 通道1/254nm

峰表

| 峰# | 保留时间   | 面积      | 高度    | 面积 %    | 高度 %    |
|----|--------|---------|-------|---------|---------|
| 1  | 18.477 | 741016  | 28390 | 50.154  | 65.480  |
| 2  | 33.753 | 736456  | 14967 | 49.846  | 34.520  |
| 总计 |        | 1477471 | 43356 | 100.000 | 100.000 |

D:\液相数据\数据文件\2019\新任务\2019-05-24-4.lod

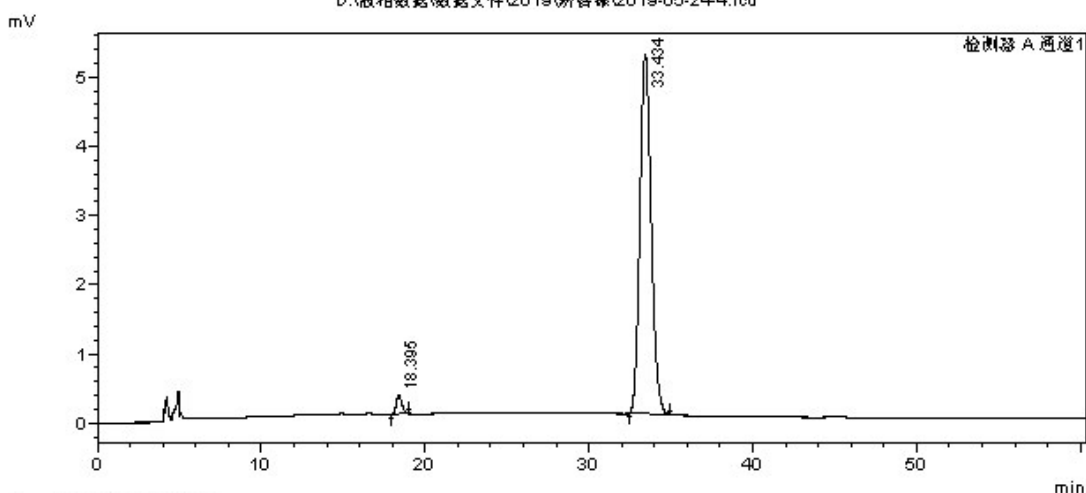

1 检测器 A 通道1/254nm

峰表

| 峰# | 保留时间   | 面积     | 高度   | 面积 %    | 高度 %    |
|----|--------|--------|------|---------|---------|
| 1  | 18.395 | 6482   | 267  | 2.530   | 4.892   |
| 2  | 33.434 | 249718 | 5190 | 97.470  | 95.108  |
| 总计 |        | 256201 | 5456 | 100.000 | 100.000 |

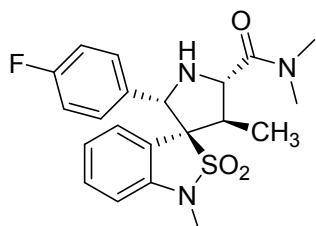

HPLC Conditions: Daicel Chiralpak AD-H, 25% IPA/hexanes, 0.8 mL/min

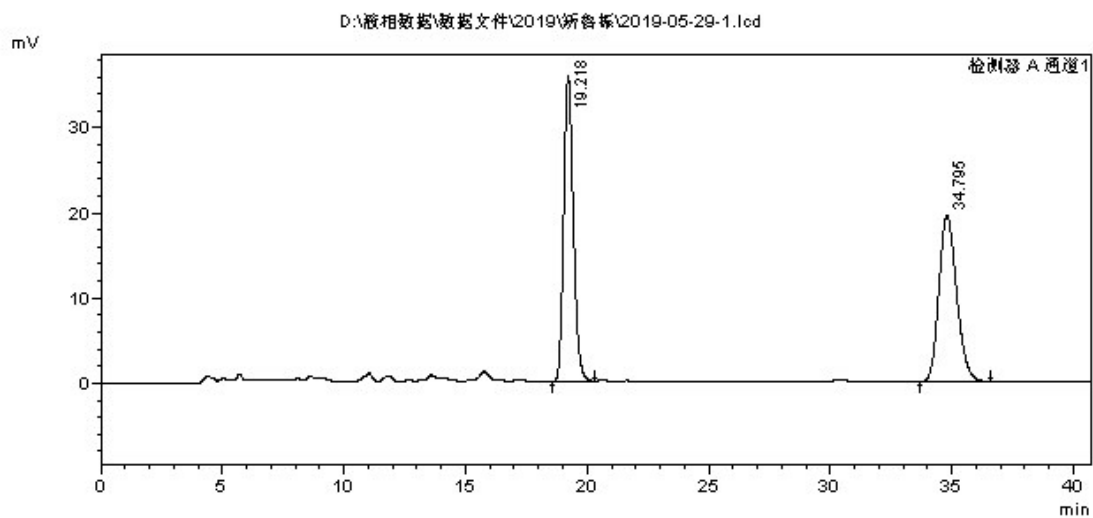

峰表

检测器 A Ch1 254nm

| 峰# | 保留时间   | 面积      | 高度    | 面积 %    | 高度 %    |
|----|--------|---------|-------|---------|---------|
| 1  | 19.218 | 989303  | 35853 | 50.053  | 64.786  |
| 2  | 34.795 | 987198  | 19488 | 49.947  | 35.214  |
| 总计 |        | 1976501 | 55341 | 100.000 | 100.000 |

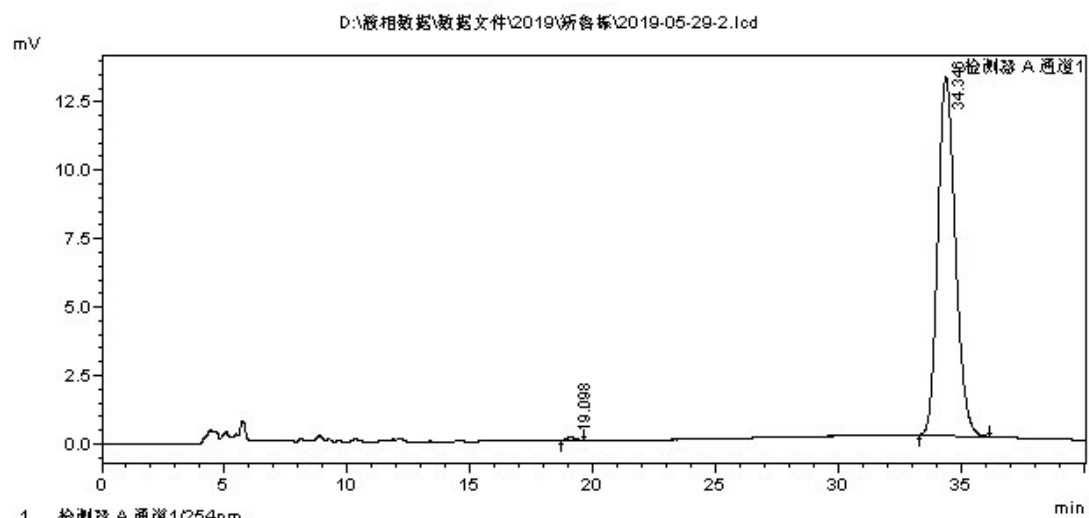

峰表

检测器 A Ch1 254nm

| 峰# | 保留时间   | 面积     | 高度    | 面积 %    | 高度 %    |
|----|--------|--------|-------|---------|---------|
| 1  | 19.098 | 3496   | 135   | 0.532   | 1.019   |
| 2  | 34.346 | 653473 | 13112 | 99.468  | 98.981  |
| 总计 |        | 656968 | 13247 | 100.000 | 100.000 |

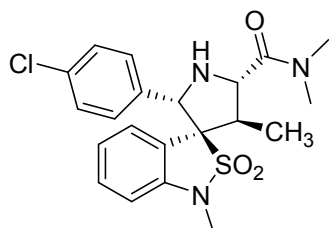

HPLC Conditions: Daicel Chiralpak AD-H, 25% IPA/hexanes, 0.8 mL/min



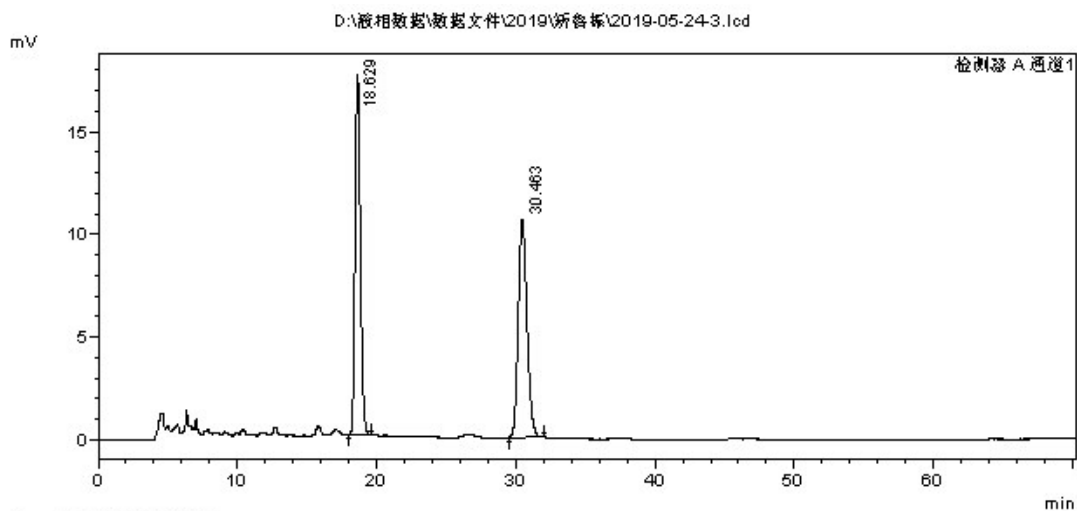

峰表

检测器 A Ch1 254nm

| 峰# | 保留时间   | 面积     | 高度    | 面积 %    | 高度 %    |
|----|--------|--------|-------|---------|---------|
| 1  | 18.629 | 466184 | 17564 | 50.035  | 62.359  |
| 2  | 30.463 | 465526 | 10602 | 49.965  | 37.641  |
| 总计 |        | 931709 | 28166 | 100.000 | 100.000 |

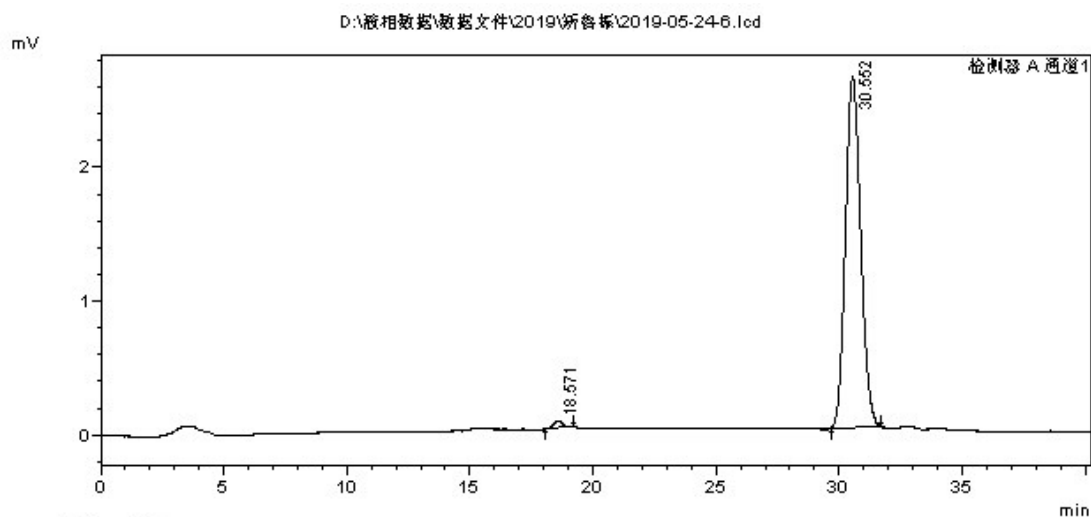

峰表

检测器 A Ch1 254nm

| 峰# | 保留时间   | 面积     | 高度   | 面积 %    | 高度 %    |
|----|--------|--------|------|---------|---------|
| 1  | 18.571 | 1381   | 50   | 1.207   | 1.868   |
| 2  | 30.552 | 112967 | 2622 | 98.793  | 98.132  |
| 总计 |        | 114347 | 2672 | 100.000 | 100.000 |

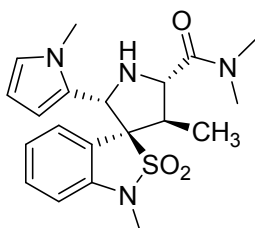

HPLC Conditions: Daicel Chiralpak AD-H, 25% IPA/hexanes, 0.8 mL/min

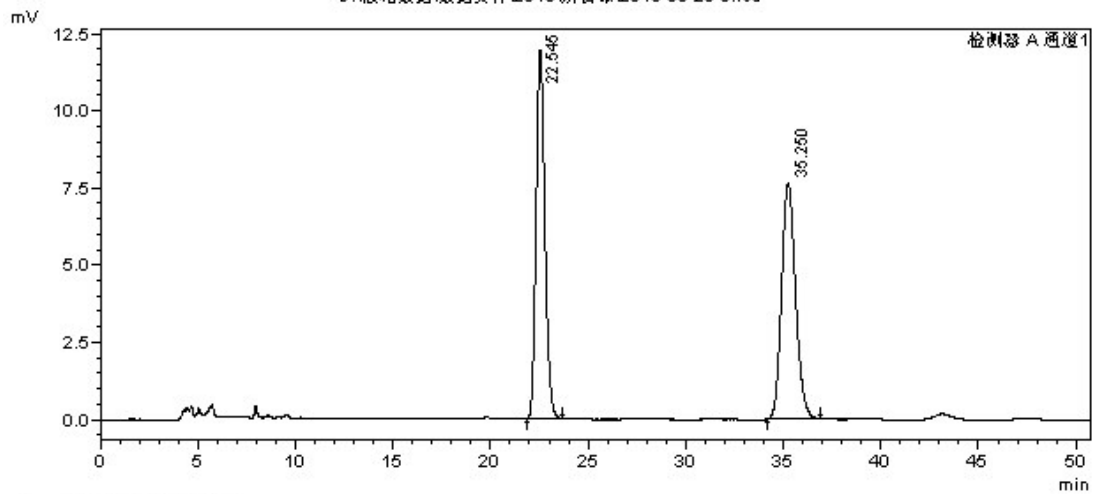

峰表

检测器 A Ch1 254nm

| 峰# | 保留时间   | 面积     | 高度    | 面积 %    | 高度 %    |
|----|--------|--------|-------|---------|---------|
| 1  | 22.545 | 374352 | 11935 | 49.685  | 61.016  |
| 2  | 35.250 | 379099 | 7625  | 50.315  | 38.984  |
| 总计 |        | 753452 | 19560 | 100.000 | 100.000 |

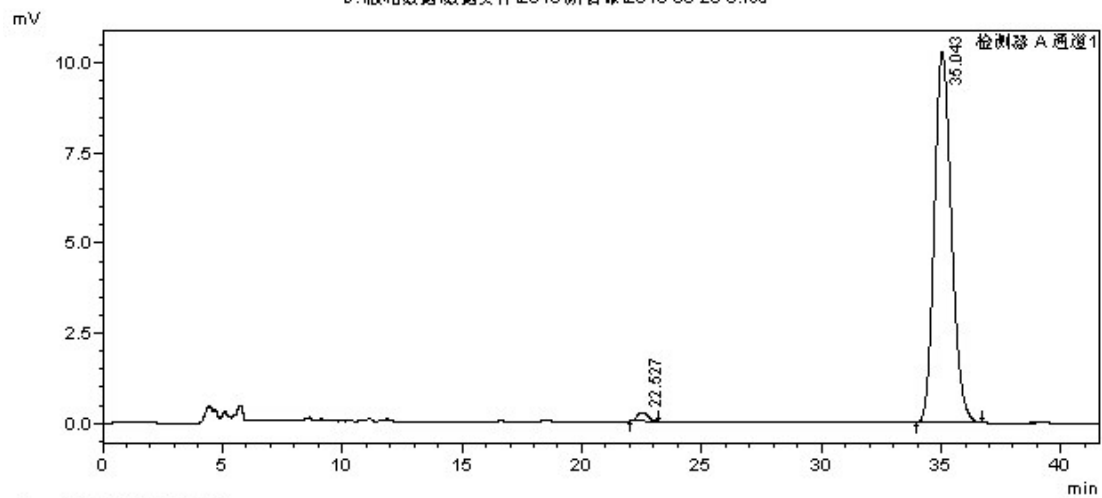

峰表

检测器 A Ch1 254nm

| 峰# | 保留时间   | 面积     | 高度    | 面积 %    | 高度 %    |
|----|--------|--------|-------|---------|---------|
| 1  | 22.527 | 7155   | 240   | 1.381   | 2.281   |
| 2  | 35.043 | 510921 | 10280 | 98.619  | 97.719  |
| 总计 |        | 518075 | 10520 | 100.000 | 100.000 |

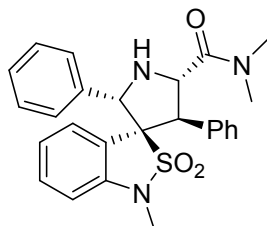

HPLC Conditions: Daicel Chiralpak AD-H, 19% IPA/hexanes, 0.6 mL/min

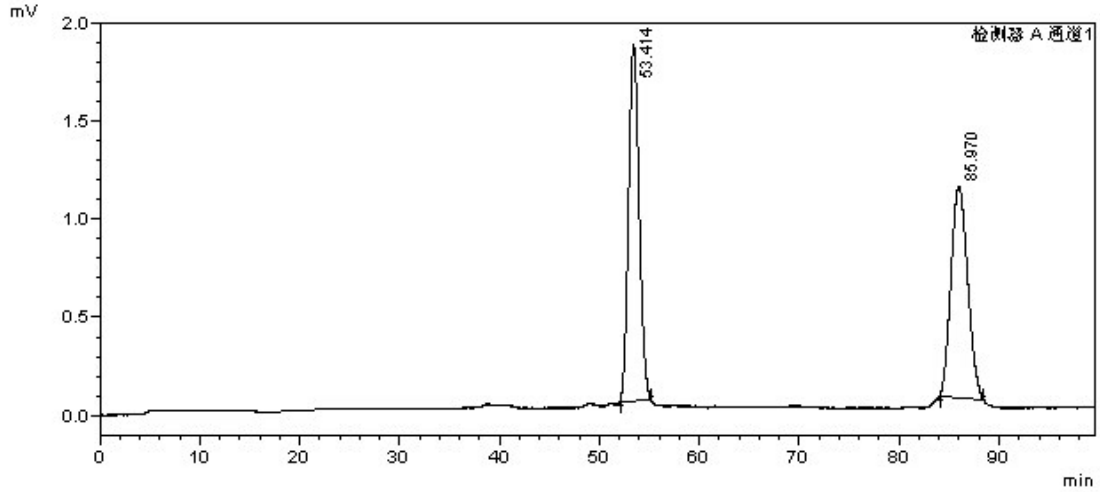

1 检测器 A 通道1/254nm

峰表

| 检测器 A Ch1 254nm |        |        |      |         |         |
|-----------------|--------|--------|------|---------|---------|
| 峰#              | 保留时间   | 面积     | 高度   | 面积 %    | 高度 %    |
| 1               | 53.414 | 133928 | 1817 | 51.580  | 62.681  |
| 2               | 85.970 | 125725 | 1082 | 48.420  | 37.319  |
| 总计              |        | 259653 | 2899 | 100.000 | 100.000 |

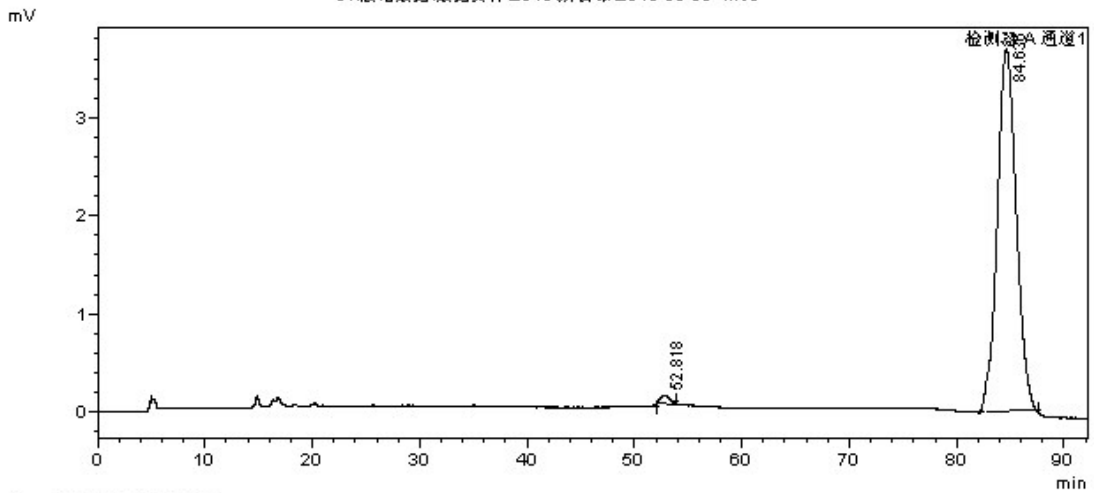

1 检测器 A 通道1/254nm

峰表

| 检测器 A Ch1 254nm |        |        |      |         |         |
|-----------------|--------|--------|------|---------|---------|
| 峰#              | 保留时间   | 面积     | 高度   | 面积 %    | 高度 %    |
| 1               | 52.818 | 5371   | 87   | 1.342   | 2.467   |
| 2               | 84.636 | 394724 | 3455 | 98.658  | 97.533  |
| 总计              |        | 400095 | 3542 | 100.000 | 100.000 |

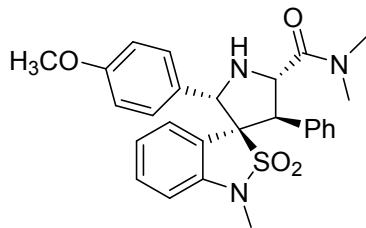

HPLC Conditions: Daicel Chiralpak AD-H, 19% IPA/hexanes, 0.6 mL/min

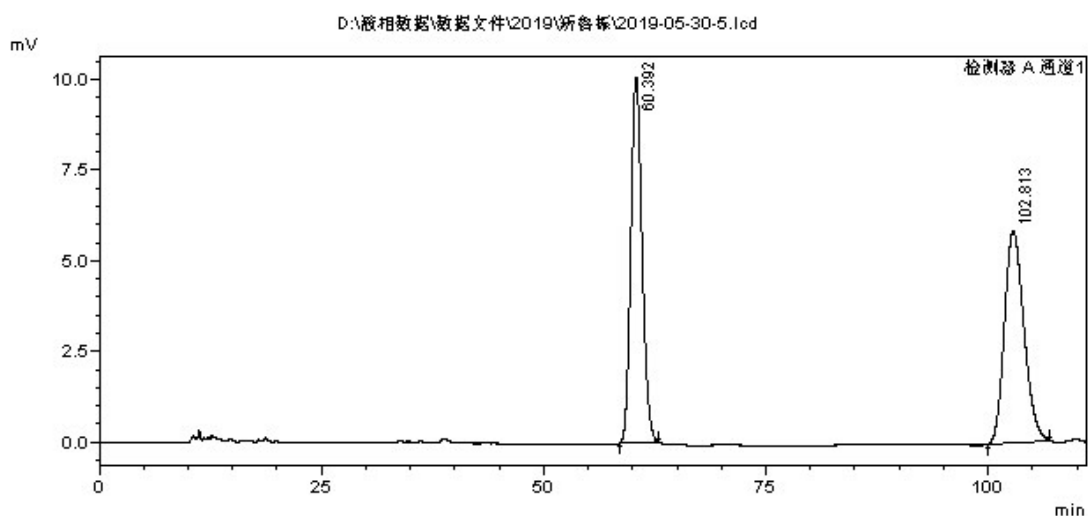

峰表

| 峰# | 保留时间    | 面积      | 高度    | 面积 %    | 高度 %    |
|----|---------|---------|-------|---------|---------|
| 1  | 60.392  | 889680  | 10074 | 49.879  | 63.265  |
| 2  | 102.813 | 894015  | 5850  | 50.121  | 36.735  |
| 总计 |         | 1783695 | 15924 | 100.000 | 100.000 |

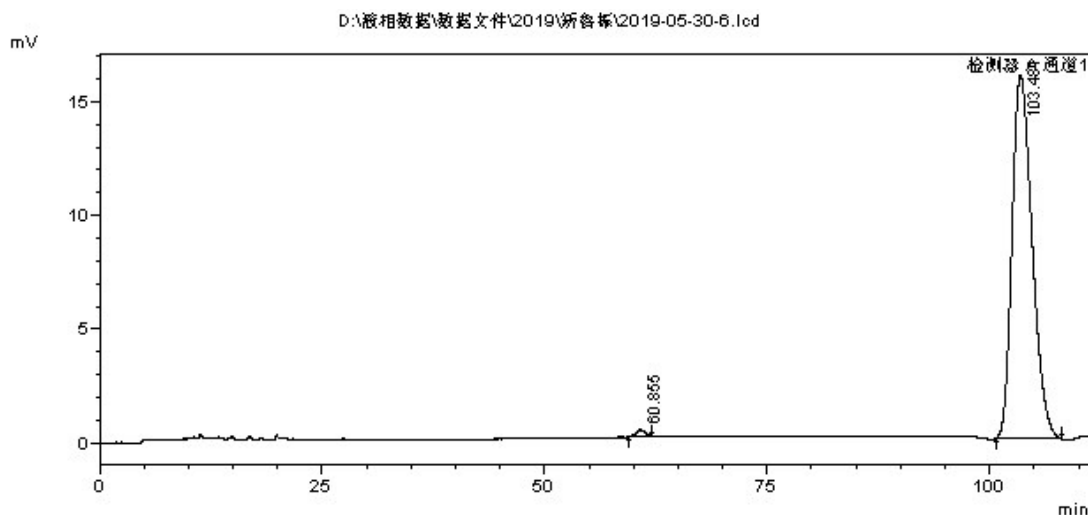

峰表

| 峰# | 保留时间    | 面积      | 高度    | 面积 %    | 高度 %    |
|----|---------|---------|-------|---------|---------|
| 1  | 60.855  | 22537   | 289   | 0.888   | 1.777   |
| 2  | 103.481 | 2514687 | 15974 | 99.112  | 98.223  |
| 总计 |         | 2537224 | 16263 | 100.000 | 100.000 |

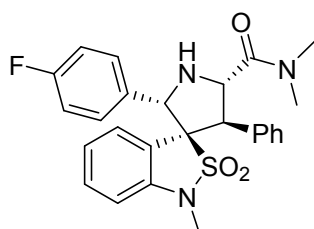

HPLC Conditions: Daicel Chiralpak AD-H, 11% IPA/hexanes, 0.7 mL/min

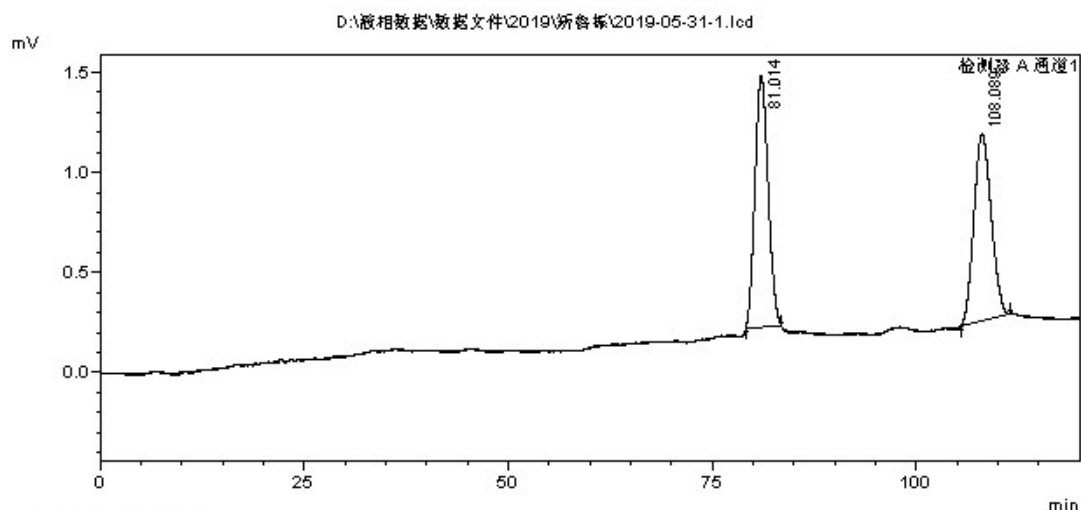

峰表

检测器 A Ch1 254nm

| 峰# | 保留时间    | 面积     | 高度   | 面积 %    | 高度 %    |
|----|---------|--------|------|---------|---------|
| 1  | 81.014  | 141295 | 1256 | 50.493  | 57.259  |
| 2  | 108.089 | 138533 | 938  | 49.507  | 42.741  |
| 总计 |         | 279828 | 2194 | 100.000 | 100.000 |

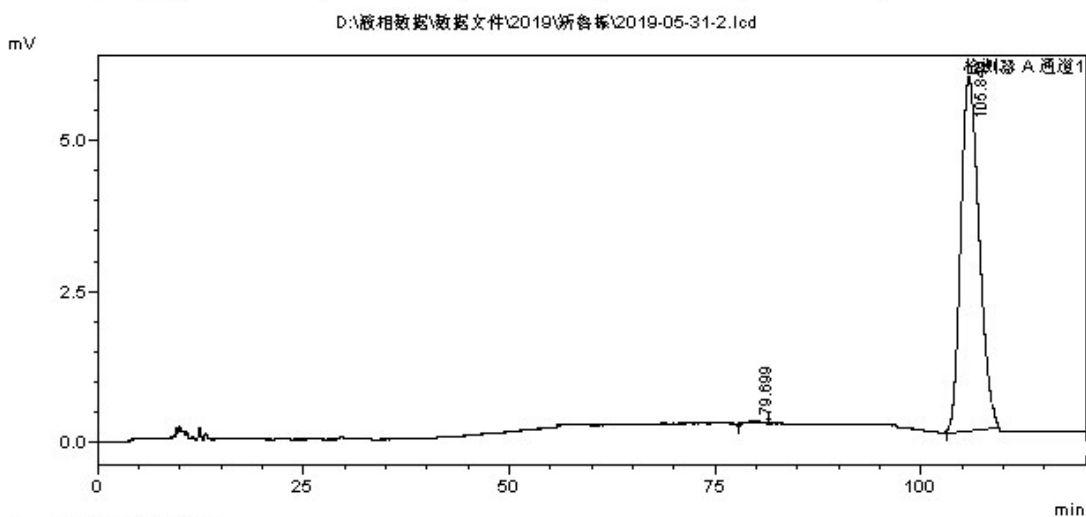

峰表

检测器 A Ch1 254nm

| 峰# | 保留时间    | 面积     | 高度   | 面积 %    | 高度 %    |
|----|---------|--------|------|---------|---------|
| 1  | 79.699  | 4374   | 43   | 0.512   | 0.742   |
| 2  | 105.849 | 849572 | 5711 | 99.488  | 99.258  |
| 总计 |         | 853946 | 5754 | 100.000 | 100.000 |
